# Supplementary material for: Antiapoptotic Protein FAIM2 is targeted by miR-3202, and DUX4 via TRIM21, leading to cell death and defective myogenesis
Source: PubMed Central journal article supplement (PMC9038730; doi:10.1038/s41419-022-04804-x), 2022-04-25
Supplement: 41419_2022_4804_MOESM1_ESM.pdf [file 41419_2022_4804_MOESM1_ESM.pdf]

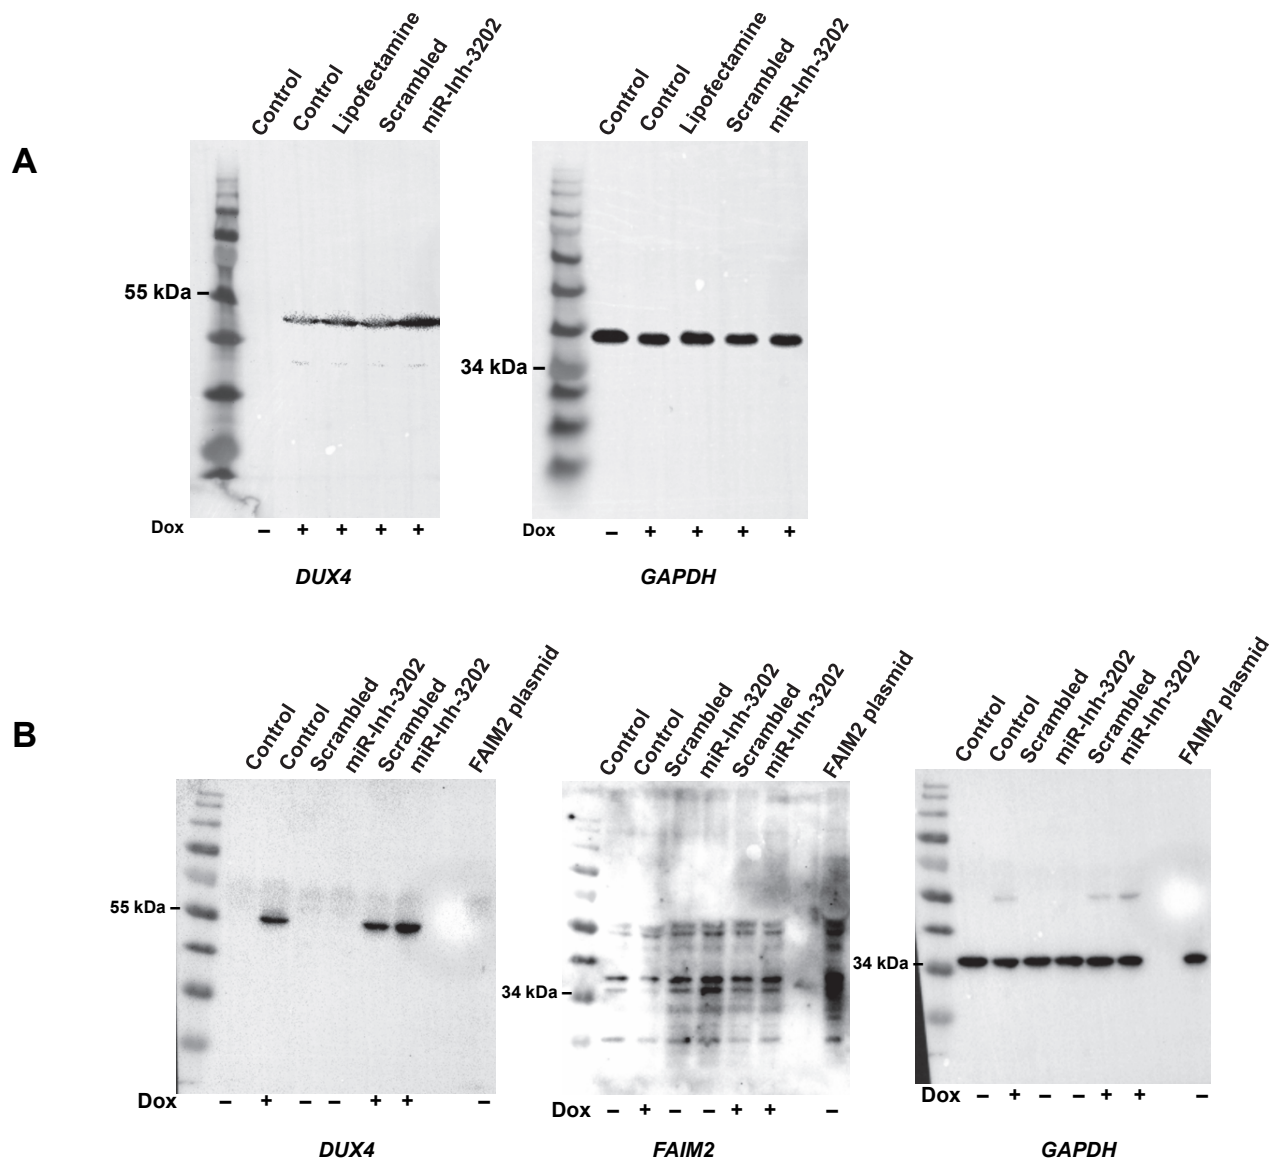

Uncropped western blots from Figure 2 of the main article.

A) Western blots of Fig. 2E

B) Western blots of Fig. 2F

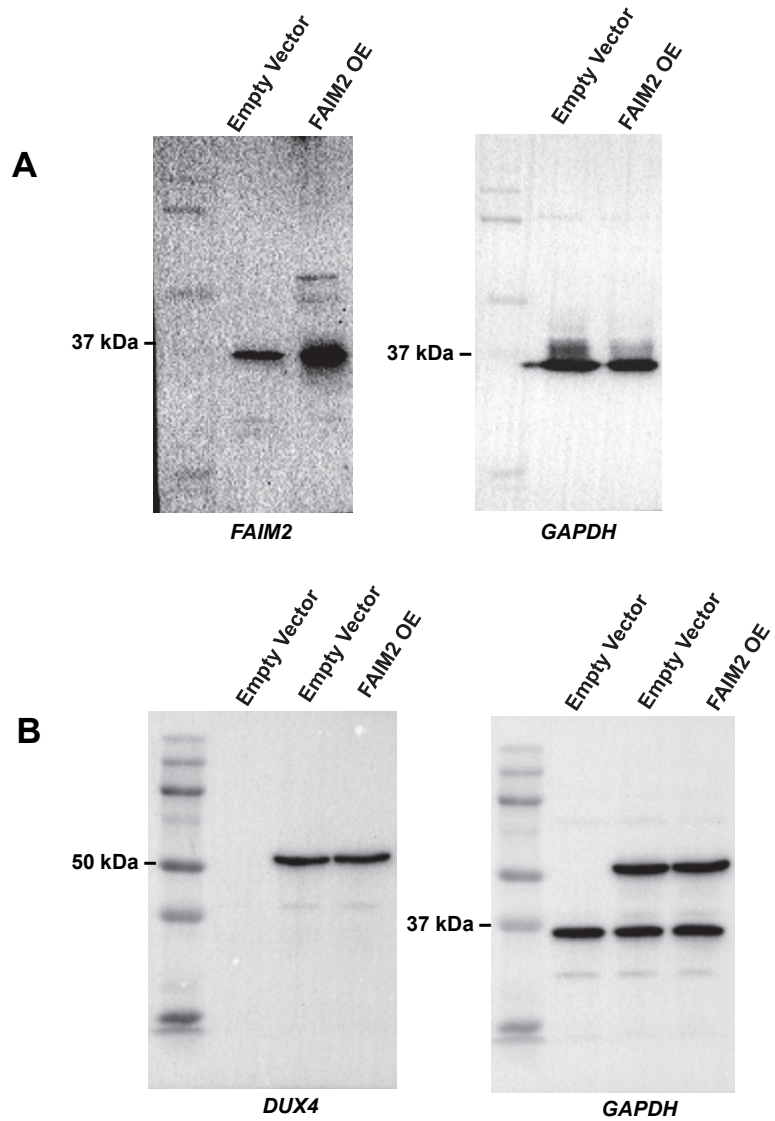

Uncropped western blots from Figure 3 of the main article.

A) Western blots of Fig. 3B

B) Western blots of Fig. 3C

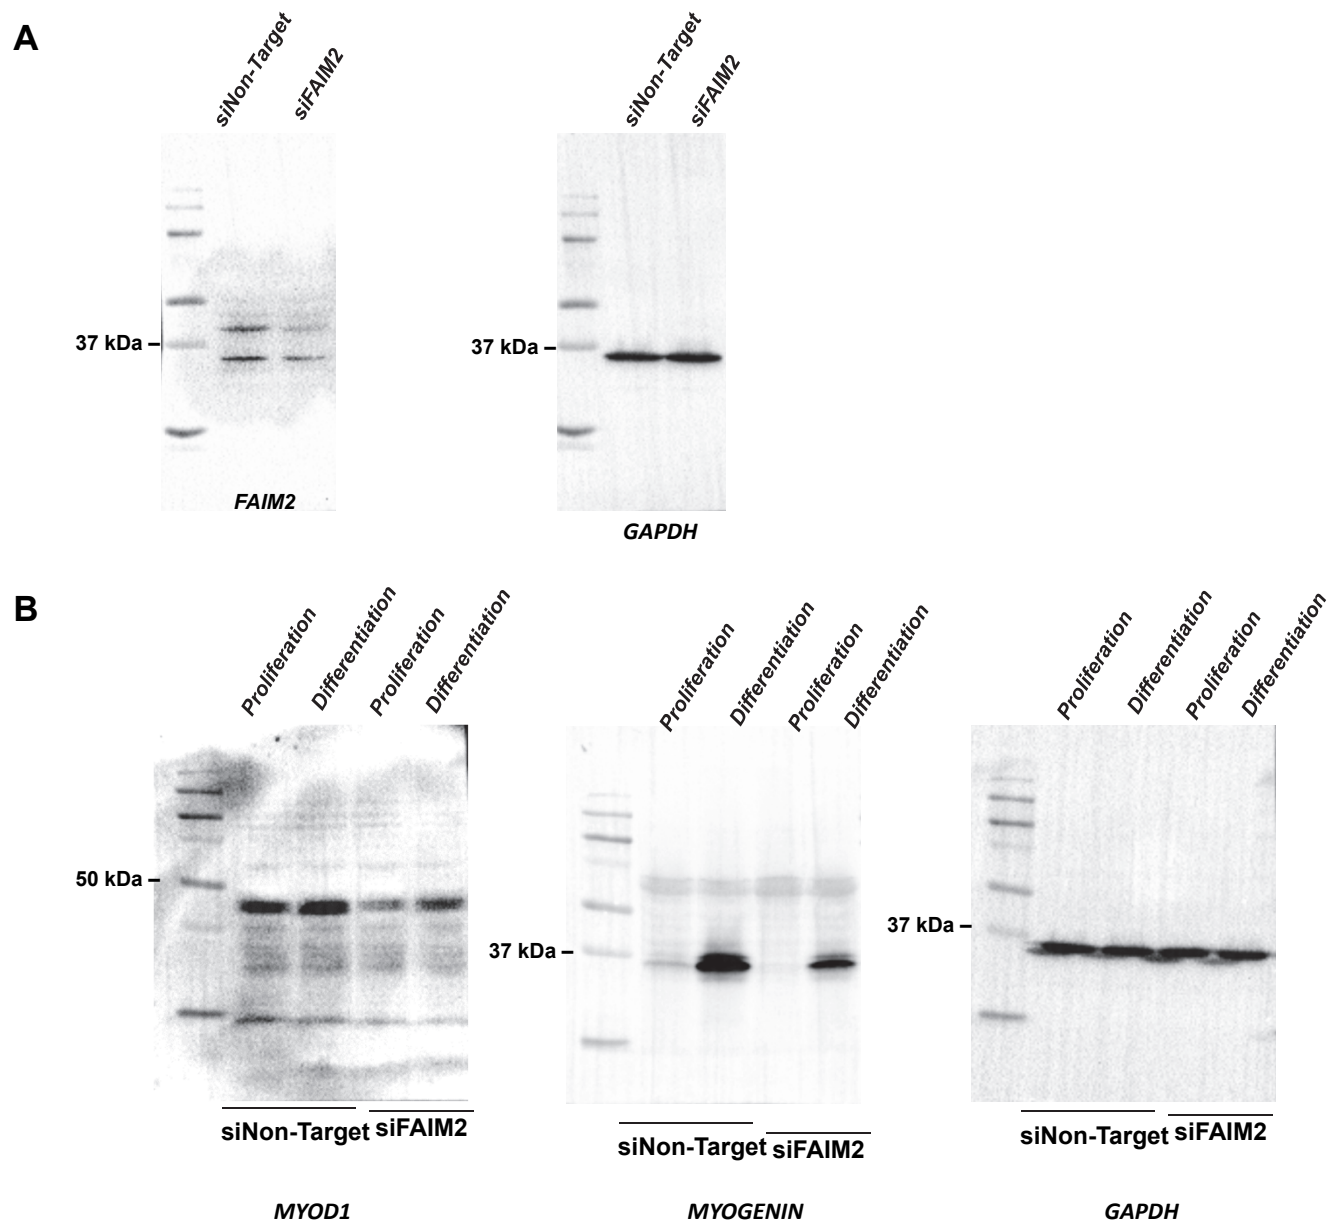

Uncropped western blots from Figure 4 of the main article

A) Western blots of Fig. 4B

B) Western blots of Fig. 4F

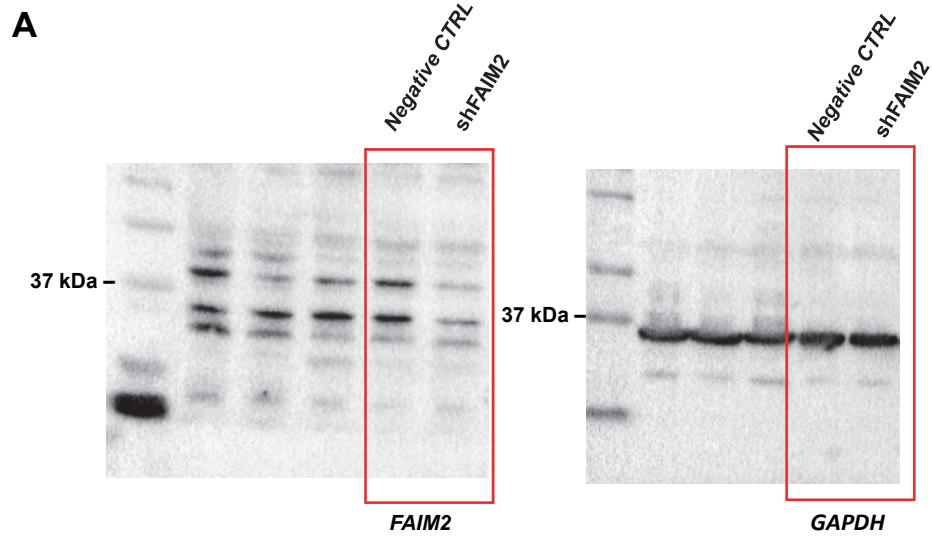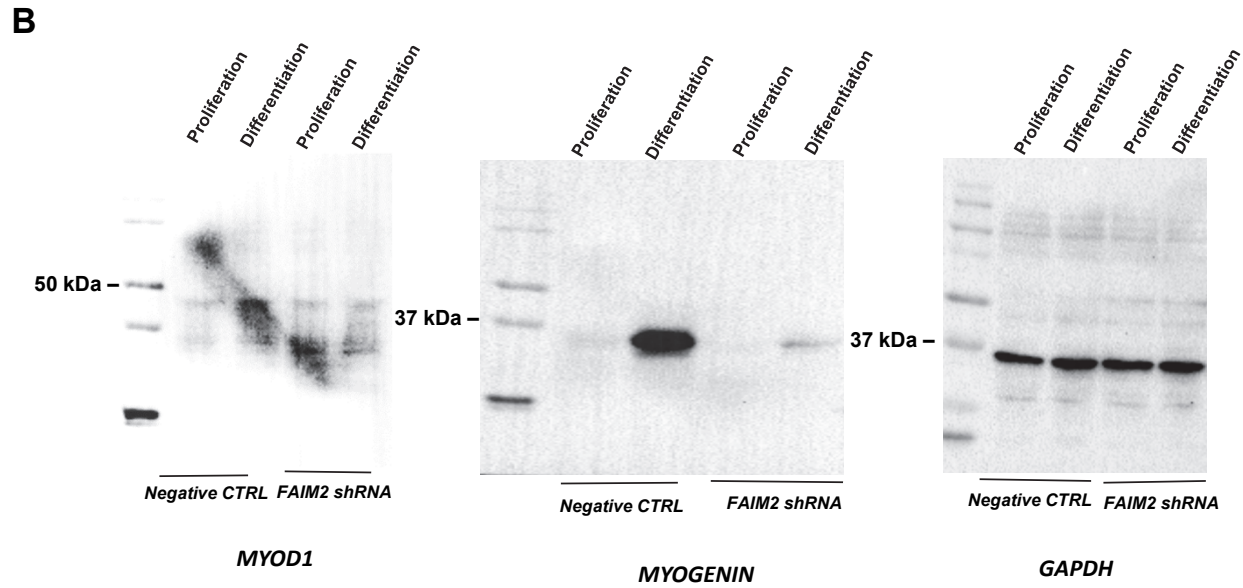

Uncropped western blots from Figure 5 of the main article  
 A) Western blots of Fig. 5B (relevant lanes highlighted in red)  
 B) Western blots of Fig. 5H

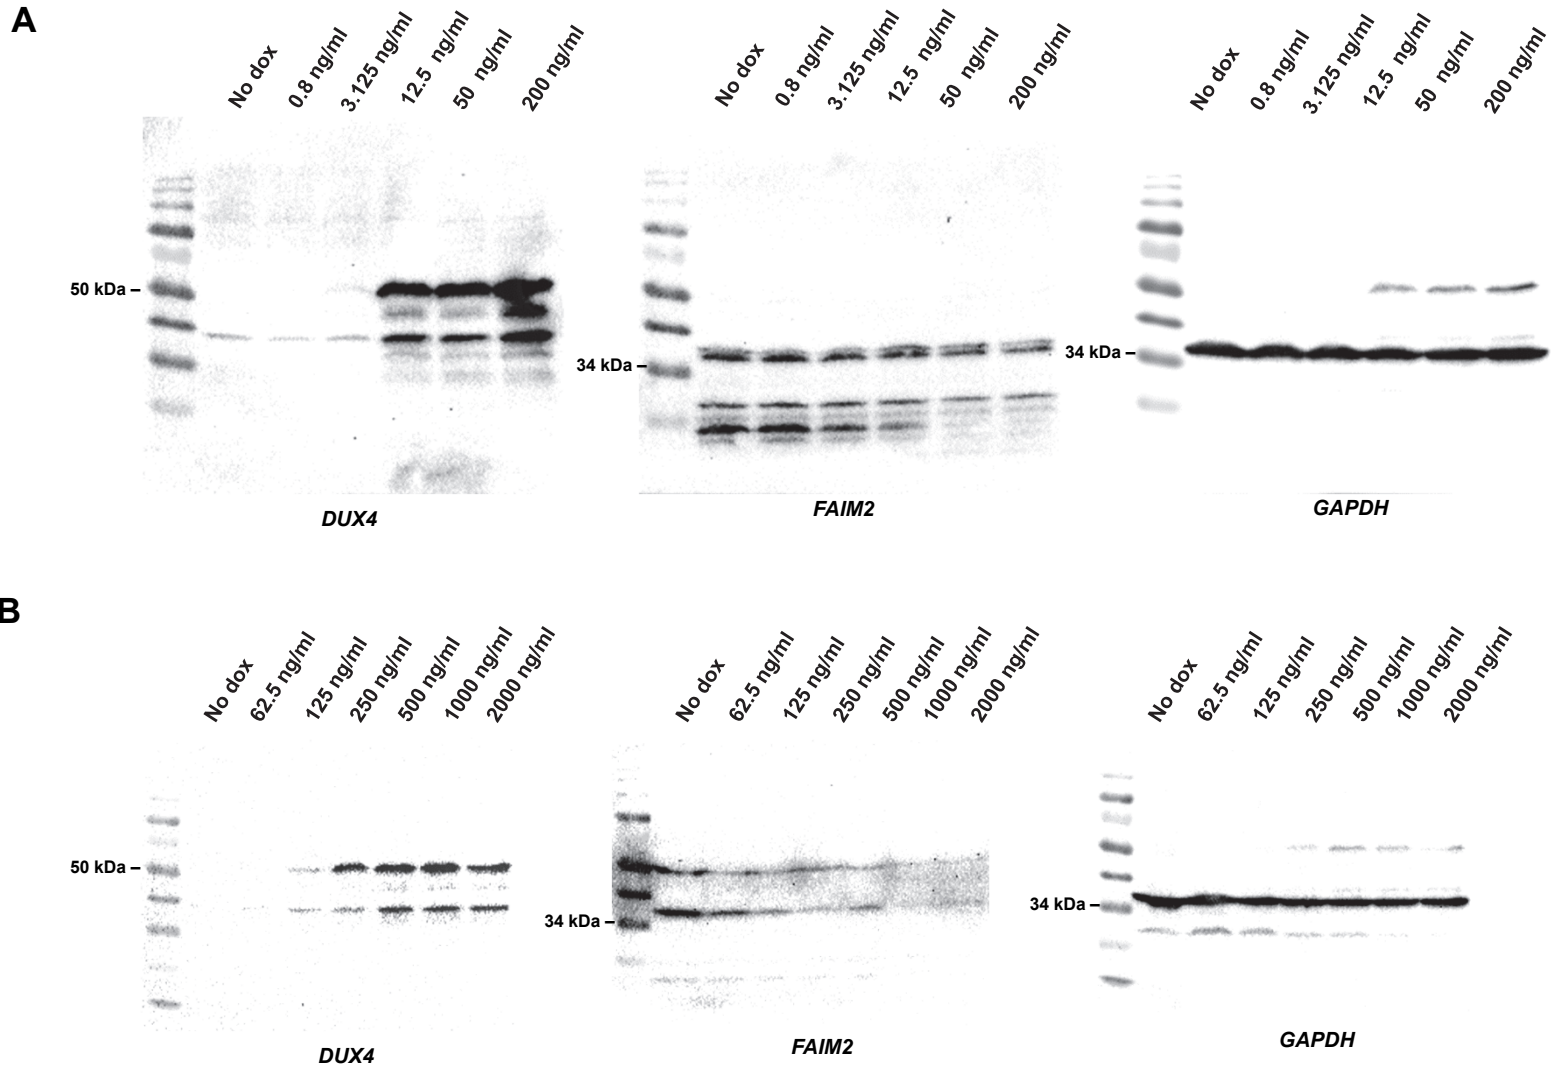

Uncropped western blots from Figure 6 of the main article  
 A) Western blots of Fig. 6B of LHCN-M2 i-DUX4 myoblasts  
 B) Western blots of Fig. 6B of 293T cells

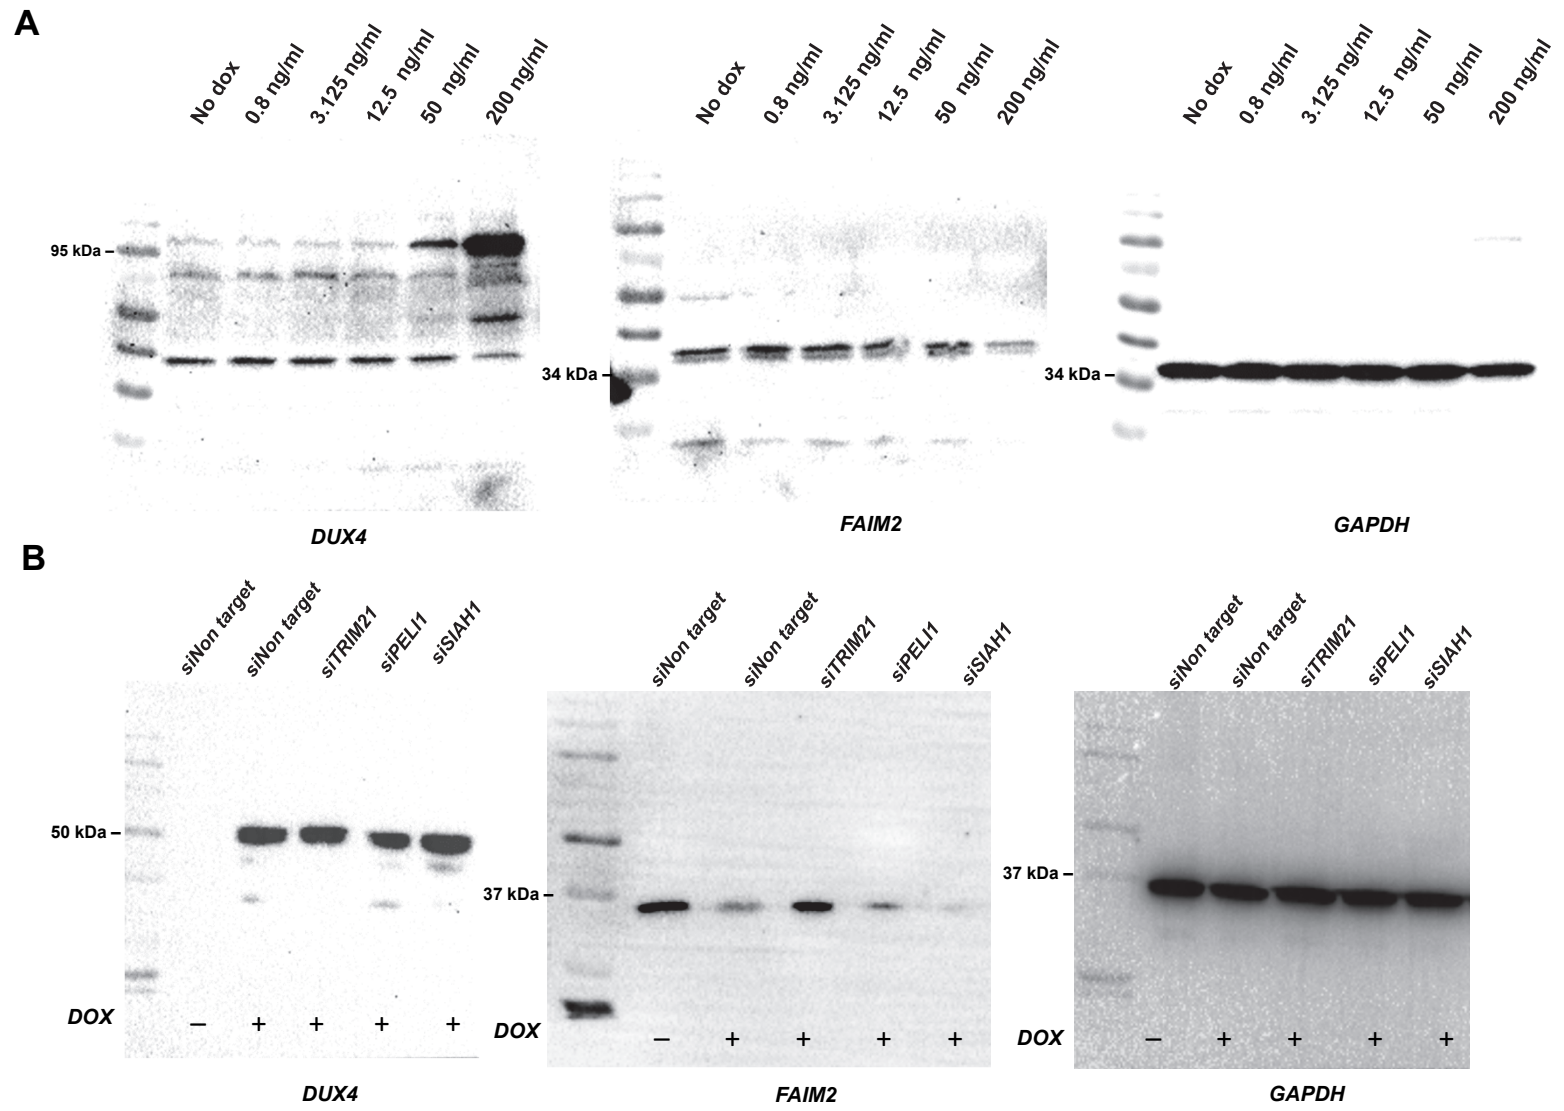

Uncropped western blots from Figure 6 of the main article  
 A) Western blots of Fig. 6B  
 B) Western blots of Fig. 6D



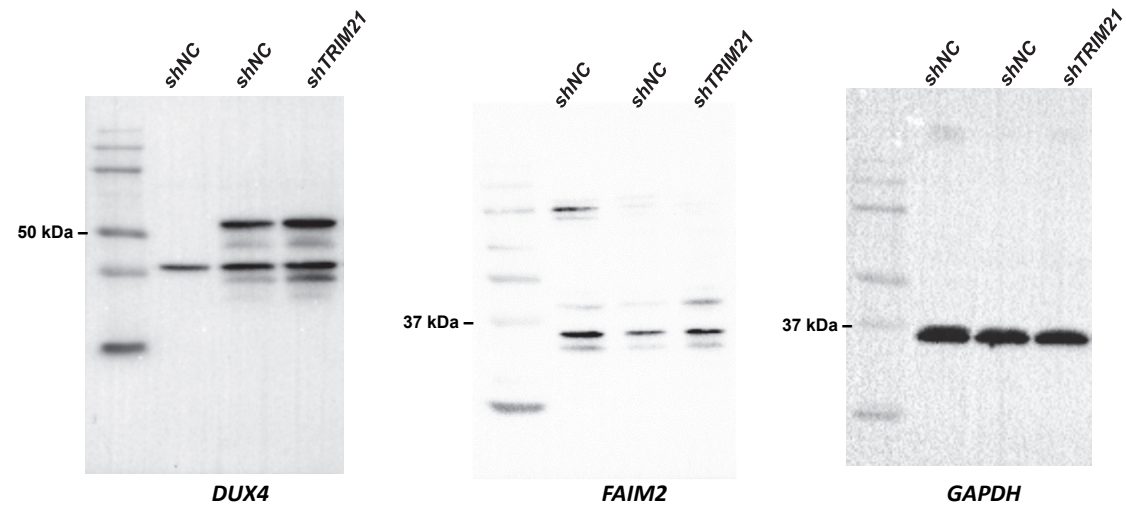

Uncropped western blots from Figure 6F of the main article
