# Supplementary material for: Antiapoptotic Protein FAIM2 is targeted by miR-3202, and DUX4 via TRIM21, leading to cell death and defective myogenesis
Source: PubMed Central journal article supplement (PMC9038730; doi:10.1038/s41419-022-04804-x), 2022-04-25
Supplement: 41419_2022_4804_MOESM2_ESM.pdf [file 41419_2022_4804_MOESM2_ESM.pdf]

Figure S1

*Correlation between duplicate tests*

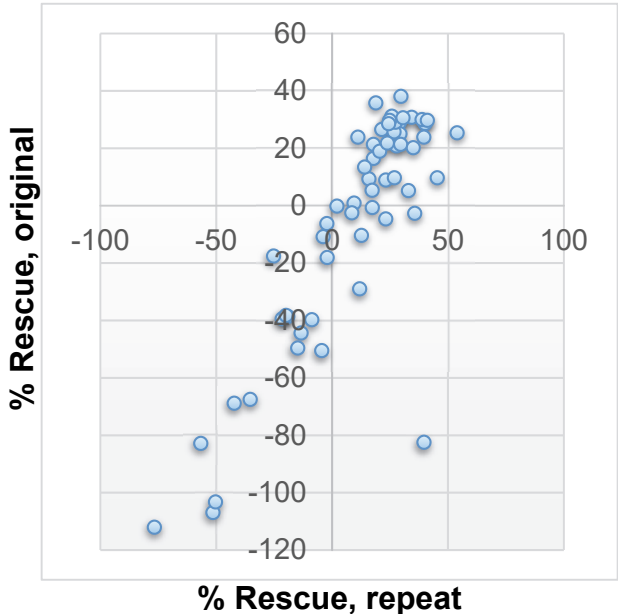

*Replicate testing: Plate 19.* Correlation coefficient for this data is 0.85.

Figure S2

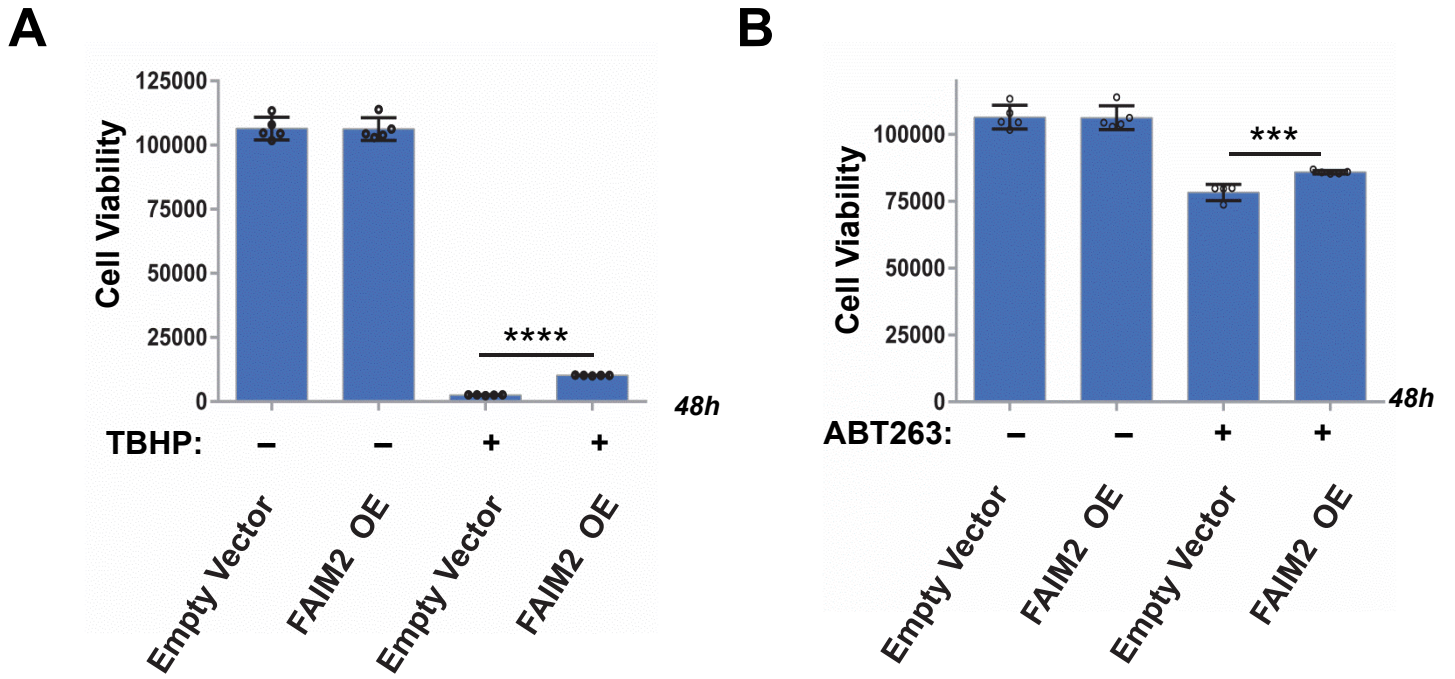

**Testing the effect of FAIM2 overexpression on cell death due to oxidative stress or BCL2 inhibition.** (A) LHCN-M2 cells transduced with FAIM2 or an empty vector control exposed to 100  $\mu$ M tert-butyl hydrogen peroxide (tBHP). (B) The same cells exposed to 25  $\mu$ M ABT263.
