# Supplementary material for: Antiapoptotic Protein FAIM2 is targeted by miR-3202, and DUX4 via TRIM21, leading to cell death and defective myogenesis
Source: PubMed Central journal article supplement (PMC9038730; doi:10.1038/s41419-022-04804-x), 2022-04-25
Supplement: 41419_2022_4804_MOESM3_ESM.pdf [file 41419_2022_4804_MOESM3_ESM.pdf]

Table S1

Full miR inhibitor screen results

| Plate    | Panel p | miRBase ID      | miRBase accession | microRNA target sequence | % rescue     |
|----------|---------|-----------------|-------------------|--------------------------|--------------|
| plate 01 | A01     |                 |                   |                          |              |
| plate 01 | A02     |                 |                   |                          |              |
| plate 01 | A03     |                 |                   |                          |              |
| plate 01 | A04     |                 |                   |                          |              |
| plate 01 | A05     |                 |                   |                          |              |
| plate 01 | A06     |                 |                   |                          |              |
| plate 01 | A07     |                 |                   |                          |              |
| plate 01 | A08     |                 |                   |                          |              |
| plate 01 | A09     |                 |                   |                          |              |
| plate 01 | A10     |                 |                   |                          |              |
| plate 01 | A11     |                 |                   |                          |              |
| plate 01 | A12     |                 |                   |                          |              |
| plate 01 | B01     |                 |                   |                          |              |
| plate 01 | B02     |                 |                   |                          |              |
| plate 01 | B03     |                 |                   |                          |              |
| plate 01 | B04     | hsa-miR-21-5p   | MIMAT0000076      | UAGCUUAUCAGACUGAUGUUGA   | 5.974508644  |
| plate 01 | B05     | hsa-miR-29a-3p  | MIMAT0000086      | UAGCACCAUCUGAAAUCGGUUA   | -1.984255075 |
| plate 01 | B06     | hsa-miR-34a-5p  | MIMAT0000255      | UGGCAGUGUCUAGCUGGUUGU    | 5.508482175  |
| plate 01 | B07     | hsa-miR-125b-5p | MIMAT0000423      | UCCUGAGACCCUAAUUGUGA     | -14.3410175  |
| plate 01 | B08     | hsa-miR-146a-5p | MIMAT0000449      | UGAGAACUGAAUCCAUGGGUU    | -1.566646941 |
| plate 01 | B09     | hsa-miR-155-5p  | MIMAT0000646      | UUAAUGCUAAUCGUGAUAGGGGU  | 2.456109676  |
| plate 01 | B10     | hsa-miR-200c-3p | MIMAT0000617      | UAAUACUGCCGGUAAUGAUGGA   | -0.92510401  |
| plate 01 | B11     | hsa-miR-101-3p  | MIMAT0000099      | UACAGUACUGUGAUACUGAA     | 6.141955383  |
| plate 01 | B12     |                 |                   |                          |              |
| plate 01 | C01     |                 |                   |                          |              |
| plate 01 | C02     | hsa-miR-145-5p  | MIMAT0000437      | GUCCAGUUUCCCAGGAAUCCCU   | -13.39887741 |
| plate 01 | C03     | hsa-miR-20a-5p  | MIMAT0000075      | UAAAGUGCUUAUAGUGCAGGUAG  | -12.44261531 |
| plate 01 | C04     | hsa-miR-126-3p  | MIMAT0000445      | UCGUACCGUGAGUAAUAAUGCG   | 1.901316261  |
| plate 01 | C05     | hsa-miR-181a-5p | MIMAT0000256      | AACAUUCAACGCUGUCGGUGAGU  | 8.002026397  |
| plate 01 | C06     | hsa-let-7a-5p   | MIMAT0000062      | UGAGGUAGUAGGUUGUAUAGUU   | 1.072152285  |
| plate 01 | C07     | hsa-miR-221-3p  | MIMAT0000278      | AGCUACAUUGUCUGCUGGGUUUC  | 7.201106449  |
| plate 01 | C08     | hsa-miR-222-3p  | MIMAT0000279      | AGCUACAUCUGGCUACUGGGU    | 9.702720393  |
| plate 01 | C09     | hsa-miR-27a-3p  | MIMAT0000084      | UUCACAGUGGCUAAGUCCGC     | 7.540034789  |
| plate 01 | C10     | hsa-miR-210-3p  | MIMAT0000267      | CUGUGCGUGUGACAGCGGCUGA   | -0.214968438 |
| plate 01 | C11     | hsa-miR-205-5p  | MIMAT0000266      | UCCUUCAUUCACCGGAGUCUG    | -24.12353848 |
| plate 01 | C12     |                 |                   |                          |              |
| plate 01 | D01     |                 |                   |                          |              |
| plate 01 | D02     | hsa-miR-17-5p   | MIMAT0000070      | CAAAGUGCUUACAGUGCAGGUAG  | 0.640422136  |
| plate 01 | D03     | hsa-miR-133a-3p | MIMAT0000427      | UUUGGUCCCUUCAACCAGCUG    | -34.08762822 |
| plate 01 | D04     | hsa-miR-125a-5p | MIMAT0000443      | UCCUGAGACCCUUAACCUGUGA   | -22.1666308  |
| plate 01 | D05     | hsa-miR-122-5p  | MIMAT0000421      | UGGAGUGUGACAAUGGUGUUUG   | 9.656319489  |
| plate 01 | D06     | hsa-miR-204-5p  | MIMAT0000265      | UUCCUUUGUCAUCCUUGCCU     | -1.183335127 |
| plate 01 | D07     | hsa-miR-143-3p  | MIMAT0000435      | UGAGAUGAAGCACUGUAGCUC    | 9.262920522  |
| plate 01 | D08     | hsa-miR-132-3p  | MIMAT0000426      | UAACAGUCUACAGCCAUGGUCG   | -10.37474894 |
| plate 01 | D09     | hsa-let-7b-5p   | MIMAT0000063      | UGAGGUAGUAGGUUGUGUGGUU   | 0.967245893  |
| plate 01 | D10     | hsa-miR-148a-3p | MIMAT0000243      | UCAGUGCACUACAGAACUUUGU   | 12.83377268  |

|          |     |                 |              |                          |              |
|----------|-----|-----------------|--------------|--------------------------|--------------|
| plate 01 | D11 | hsa-miR-15a-5p  | MIMAT0000068 | UAGCAGCACAUAAUGGUUUGUG   | 3.670602898  |
| plate 01 | D12 |                 |              |                          |              |
| plate 01 | E01 |                 |              |                          |              |
| plate 01 | E02 | hsa-miR-223-3p  | MIMAT0000280 | UGUCAGUUUGUCAAAUACCCCA   | -11.78089807 |
| plate 01 | E03 | hsa-miR-106b-5p | MIMAT0000680 | UAAAGUGCUGACAGUGCAGAU    | 2.161564809  |
| plate 01 | E04 | hsa-miR-18a-5p  | MIMAT0000072 | UAAGGUGCAUCUAGUGCAGAUAG  | 3.228785596  |
| plate 01 | E05 | hsa-miR-19a-3p  | MIMAT0000073 | UGUGCAAUCUAUGCAAACUGA    | -0.92712144  |
| plate 01 | E06 | hsa-miR-200a-3p | MIMAT0000682 | UAACACUGUCUGGUAACGAUGU   | 13.19892762  |
| plate 01 | E07 | hsa-miR-375     | MIMAT0000728 | UUUGUUCGUUCGGCUCGCGUGA   | 9.367826913  |
| plate 01 | E08 | hsa-miR-130a-3p | MIMAT0000425 | CAGUGCAAUGUAAAAGGGCAU    | 4.154786242  |
| plate 01 | E09 | hsa-miR-182-5p  | MIMAT0000259 | UUUGGCAAUGGUAGAACUCACACU | 3.763404706  |
| plate 01 | E10 | hsa-miR-199a-5p | MIMAT0000231 | CCCAGUGUUCAGACUACCUGUUC  | -24.86797038 |
| plate 01 | E11 | hsa-miR-22-3p   | MIMAT0000077 | AAGCUGCCAGUUGAAGAACUGU   | 0.503236855  |
| plate 01 | E12 |                 |              |                          |              |
| plate 01 | F01 |                 |              |                          |              |
| plate 01 | F02 | hsa-miR-128-3p  | MIMAT0000424 | UCACAGUGAACCGGUCUCUUU    | 2.793020587  |
| plate 01 | F03 | hsa-miR-141-3p  | MIMAT0000432 | UAACACUGUCUGGUAAGAUGG    | 12.63001219  |
| plate 01 | F04 | hsa-miR-93-5p   | MIMAT0000093 | CAAAGUCUGUUCGUGCAGGUAG   | 12.81359838  |
| plate 01 | F05 | hsa-miR-195-5p  | MIMAT0000461 | UAGCAGCACAGAAUAUUGGC     | 16.8303027   |
| plate 01 | F06 | hsa-let-7c-5p   | MIMAT0000064 | UGAGGUAGUAGGUUGUAUGGUU   | 5.964421491  |
| plate 01 | F07 | hsa-let-7g-5p   | MIMAT0000414 | UGAGGUAGUAGUUUGUACAGUU   | 2.151477656  |
| plate 01 | F08 | hsa-miR-10a-5p  | MIMAT0000253 | UACCCUGUAGAUCCGAAUUGUG   | 4.836677785  |
| plate 01 | F09 | hsa-miR-107     | MIMAT0000104 | AGCAGCAUUGUACAGGGCUAUCA  | 9.809644215  |
| plate 01 | F10 | hsa-miR-23a-3p  | MIMAT0000078 | AUCACAUUGCCAGGGAUUCC     | 9.250815939  |
| plate 01 | F11 | hsa-miR-29c-3p  | MIMAT0000681 | UAGCACCAUUUGAAAUCGUAUA   | 2.661887598  |
| plate 01 | F12 |                 |              |                          |              |
| plate 01 | G01 |                 |              |                          |              |
| plate 01 | G02 | hsa-miR-25-3p   | MIMAT0000081 | CAUUGCACUUGUCUCGGUCUGA   | -16.92131124 |
| plate 01 | G03 | hsa-miR-26a-5p  | MIMAT0000082 | UUCAAGUAAUCCAGGAUAGGCU   | 10.17883401  |
| plate 01 | G04 | hsa-miR-142-3p  | MIMAT0000434 | UGUAGUGUUUCCUACUUUAUGGA  | 13.47733305  |
| plate 01 | G05 | hsa-miR-23b-3p  | MIMAT0000418 | AUCACAUUGCCAGGGAUUACC    | -38.10029768 |
| plate 01 | G06 | hsa-miR-150-5p  | MIMAT0000451 | UCUCCAACCCUUGUACCAGUG    | -25.67292518 |
| plate 01 | G07 | hsa-miR-10b-5p  | MIMAT0000254 | UACCCUGUAGAACCGAAUUGUG   | 2.853543505  |
| plate 01 | G08 | hsa-miR-199a-3p | MIMAT0000232 | ACAGUAGUCUGCACAUUGGUUA   | -2.012499103 |
| plate 01 | G09 | hsa-miR-30a-5p  | MIMAT0000087 | UGUAAACAUCUCCGACUGGAAG   | 13.6125009   |
| plate 01 | G10 | hsa-miR-26b-5p  | MIMAT0000083 | UUCAAGUAAUUCAGGAUAGGU    | 9.08740406   |
| plate 01 | G11 | hsa-miR-133b    | MIMAT0000770 | UUUGGUCCCCUUAACCAGCUA    | -49.355543   |
| plate 01 | G12 |                 |              |                          |              |
| plate 01 | H01 |                 |              |                          |              |
| plate 01 | H02 |                 |              |                          |              |
| plate 01 | H03 |                 |              |                          |              |
| plate 01 | H04 |                 |              |                          |              |
| plate 01 | H05 |                 |              |                          |              |
| plate 01 | H06 |                 |              |                          |              |
| plate 01 | H07 |                 |              |                          |              |
| plate 01 | H08 |                 |              |                          |              |
| plate 01 | H09 |                 |              |                          |              |
| plate 01 | H10 |                 |              |                          |              |
| plate 01 | H11 |                 |              |                          |              |

|          |     |                 |              |                          |              |
|----------|-----|-----------------|--------------|--------------------------|--------------|
| plate 01 | H12 |                 |              |                          |              |
| plate 02 | A01 |                 |              |                          |              |
| plate 02 | A02 |                 |              |                          |              |
| plate 02 | A03 |                 |              |                          |              |
| plate 02 | A04 |                 |              |                          |              |
| plate 02 | A05 |                 |              |                          |              |
| plate 02 | A06 |                 |              |                          |              |
| plate 02 | A07 |                 |              |                          |              |
| plate 02 | A08 |                 |              |                          |              |
| plate 02 | A09 |                 |              |                          |              |
| plate 02 | A10 |                 |              |                          |              |
| plate 02 | A11 |                 |              |                          |              |
| plate 02 | A12 |                 |              |                          |              |
| plate 02 | B01 |                 |              |                          |              |
| plate 02 | B02 |                 |              |                          |              |
| plate 02 | B03 |                 |              |                          |              |
| plate 02 | B04 | hsa-miR-106a-5p | MIMAT0000103 | AAAAGUGCUUACAGUGCAGGUAG  | -47.1967695  |
| plate 02 | B05 | hsa-miR-27b-3p  | MIMAT0000419 | UUCACAGUGGCUAAGUUCUGC    | 20.39857395  |
| plate 02 | B06 | hsa-miR-335-5p  | MIMAT0000765 | UCAAGAGCAAUAACGAAAAUUGU  | 11.13337138  |
| plate 02 | B07 | hsa-let-7d-5p   | MIMAT0000065 | AGAGGUAGUAGGUUGCAUAGUU   | -1.913905524 |
| plate 02 | B08 | hsa-miR-192-5p  | MIMAT0000222 | CUGACCUAUGAAUUGACAGCC    | 5.453223461  |
| plate 02 | B09 | hsa-miR-193b-3p | MIMAT0002819 | AACUGGCCCUCAAAGUCCCGCU   | -4.112785952 |
| plate 02 | B10 | hsa-miR-320a    | MIMAT0000510 | AAAAGCUGGGUUGAGAGGGCGA   | -17.30958673 |
| plate 02 | B11 | hsa-miR-30c-5p  | MIMAT0000244 | UGUAAACAUCUACACUCUCAGC   | -16.49688052 |
| plate 02 | B12 |                 |              |                          |              |
| plate 02 | C01 |                 |              |                          |              |
| plate 02 | C02 | hsa-miR-424-5p  | MIMAT0001341 | CAGCAGCAAUUC AUGUUUUGAA  | 8.702289181  |
| plate 02 | C03 | hsa-miR-144-3p  | MIMAT0000436 | UACAGUAUAGAUGAUGUACU     | 13.56797179  |
| plate 02 | C04 | hsa-let-7e-5p   | MIMAT0000066 | UGAGGUAGGAGGUUGUAUAGUU   | -7.843846262 |
| plate 02 | C05 | hsa-miR-15b-5p  | MIMAT0000417 | UAGCAGCACAUCAUGGUUUACA   | 22.46728066  |
| plate 02 | C06 | hsa-miR-146b-5p | MIMAT0002809 | UGAGAACUGAAUCCAUAGGCU    | 26.58710303  |
| plate 02 | C07 | hsa-miR-30b-5p  | MIMAT0000420 | UGUAAACAUCUACACUCAGCU    | 15.08959705  |
| plate 02 | C08 | hsa-miR-140-3p  | MIMAT0004597 | UACCACAGGGUAGAACCACGG    | 2.402936532  |
| plate 02 | C09 | hsa-miR-130b-3p | MIMAT0000691 | CAGUGCAAUGAUGAAAGGGCAU   | 0.1213782    |
| plate 02 | C10 | hsa-miR-20b-5p  | MIMAT0001413 | CAAAGUGCUC AUAGUGCAGGUAG | -5.588674495 |
| plate 02 | C11 | hsa-miR-99a-5p  | MIMAT0000097 | AACCCGUAGAUC CGAUCUUGUG  | 10.75164574  |
| plate 02 | C12 |                 |              |                          |              |
| plate 02 | D01 |                 |              |                          |              |
| plate 02 | D02 | hsa-miR-148b-3p | MIMAT0000759 | UCAGUGCAUCACAGAACUUUGU   | 10.09549982  |
| plate 02 | D03 | hsa-miR-32-5p   | MIMAT0000090 | UAUUGCACAUUACUAAGUUGCA   | 7.768204775  |
| plate 02 | D04 | hsa-miR-29b-3p  | MIMAT0000100 | UAGCACCAUUUGAAAUCAGUGUU  | 6.908002752  |
| plate 02 | D05 | hsa-miR-33a-5p  | MIMAT0000091 | GUGCAUUGUAGUUGCAUUGCA    | 16.80120557  |
| plate 02 | D06 | hsa-miR-191-5p  | MIMAT0000440 | CAACGGAAUCCCAAAGCAGCUG   | 1.287664379  |
| plate 02 | D07 | hsa-let-7f-5p   | MIMAT0000067 | UGAGGUAGUAGAUUGUAUAGUU   | -1.479406752 |
| plate 02 | D08 | hsa-miR-328-3p  | MIMAT0000752 | CUGGCCUCUCUCGCCUUC CGU   | 2.471541601  |
| plate 02 | D09 | hsa-miR-24-3p   | MIMAT0000080 | UGGCUCAGUUCAGCAGGAACAG   | 5.177044079  |
| plate 02 | D10 | hsa-miR-331-3p  | MIMAT0000760 | GCCCCUGGGCCUAUCCUAGAA    | -4.03890357  |
| plate 02 | D11 | hsa-miR-140-5p  | MIMAT0000431 | CAGUGGUUUUACCCUAUGGUAG   | 6.89920723   |
| plate 02 | D12 |                 |              |                          |              |

|          |     |                 |              |                         |              |
|----------|-----|-----------------|--------------|-------------------------|--------------|
| plate 02 | E01 |                 |              |                         |              |
| plate 02 | E02 | hsa-let-7i-5p   | MIMAT0000415 | UGAGGUAGUAGUUUGUCUGUU   | -6.786624552 |
| plate 02 | E03 | hsa-miR-215-5p  | MIMAT0000272 | AUGACCUAUGAAUUGACAGAC   | -15.85480744 |
| plate 02 | E04 | hsa-miR-19b-3p  | MIMAT0000074 | UGUGCAAUCCAUGCAAAACUGA  | -65.32609885 |
| plate 02 | E05 | hsa-miR-9-5p    | MIMAT0000441 | UCUUUGGUUAUCUAGCUGUAUGA | 14.73777618  |
| plate 02 | E06 | hsa-miR-421     | MIMAT0003339 | AUCAACAGACAUUAAUUGGGCGC | -57.77250481 |
| plate 02 | E07 | hsa-miR-124-3p  | MIMAT0000422 | UAAGGCACGCGGUGAAUGCC    | 8.568597251  |
| plate 02 | E08 | hsa-miR-378a-3p | MIMAT0000732 | ACUGGACUUGGAGUCAGAAGGC  | -31.59175488 |
| plate 02 | E09 | hsa-miR-185-5p  | MIMAT0000455 | UGGAGAGAAAGGCAGUCCUGA   | -25.20268791 |
| plate 02 | E10 | hsa-miR-326     | MIMAT0000756 | CCUCUGGGCCCUUCCUCCAG    | -5.690702547 |
| plate 02 | E11 | hsa-miR-346     | MIMAT0000773 | UGUCUGCCCUGAUGCCUGCCUCU | -65.57589167 |
| plate 02 | E12 |                 |              |                         |              |
| plate 02 | F01 |                 |              |                         |              |
| plate 02 | F02 | hsa-miR-200b-3p | MIMAT0000318 | UAAUACUGCCUGGUAUUGAUGA  | 6.288798024  |
| plate 02 | F03 | hsa-miR-30d-5p  | MIMAT0000245 | UGUAAACAUCCCCACUGGAAG   | 10.24678279  |
| plate 02 | F04 | hsa-miR-31-5p   | MIMAT0000089 | AGGCAAGAUGCUGGCAUAGCU   | -11.27761794 |
| plate 02 | F05 | hsa-miR-338-3p  | MIMAT0000763 | UCCAGCAUCAGUGAUUUUGUUG  | -6.382030554 |
| plate 02 | F06 | hsa-miR-425-5p  | MIMAT0003393 | AAUGACACGAUCACUCCCGUUGA | -32.58740794 |
| plate 02 | F07 | hsa-miR-214-3p  | MIMAT0000271 | ACAGCAGGCACAGACAGGCAGU  | -54.83655966 |
| plate 02 | F08 | hsa-miR-196a-5p | MIMAT0000226 | UAGGUAGUUUCAUGUUGUUGGG  | 8.526378747  |
| plate 02 | F09 | hsa-miR-301a-3p | MIMAT0000688 | CAGUGCAAUAGUAUUGUCAAGC  | -2.003619846 |
| plate 02 | F10 | hsa-miR-96-5p   | MIMAT0000095 | UUUGGCACUAGCACAUUUUUGCU | 3.78383344   |
| plate 02 | F11 | hsa-miR-142-5p  | MIMAT0000433 | CAUAAAGUAGAAAGCACUACU   | -3.205088112 |
| plate 02 | F12 |                 |              |                         |              |
| plate 02 | G01 |                 |              |                         |              |
| plate 02 | G02 | hsa-miR-206     | MIMAT0000462 | UGGAAUGUAAGGAAGUGUGUGG  | 0.131932826  |
| plate 02 | G03 | hsa-miR-152-3p  | MIMAT0000438 | UCAGUGCAUGACAGAACUUGG   | 3.785592545  |
| plate 02 | G04 | hsa-miR-296-5p  | MIMAT0000690 | AGGGCCCCCUCAAUCCUGU     | 5.20167154   |
| plate 02 | G05 | hsa-miR-486-5p  | MIMAT0002177 | UCCUGUACUGAGCUGCCCCGAG  | 11.65934358  |
| plate 02 | G06 | hsa-miR-218-5p  | MIMAT0000275 | UUGUGCUUGAUCUAACCAUGU   | 8.626647694  |
| plate 02 | G07 | hsa-miR-103a-3p | MIMAT0000101 | AGCAGCAUUGUACAGGGCUAUGA | 23.3362782   |
| plate 02 | G08 | hsa-miR-183-5p  | MIMAT0000261 | UAUGGCACUGGUAGAAUUCACU  | 18.42485888  |
| plate 02 | G09 | hsa-miR-186-5p  | MIMAT0000456 | CAAAGAAUUCUCCUUUUGGGCU  | 15.80731162  |
| plate 02 | G10 | hsa-miR-92a-3p  | MIMAT0000092 | UAUUGCACUUGUCCCGGCCUGU  | 3.368684815  |
| plate 02 | G11 | hsa-miR-365a-3p | MIMAT0000710 | UAAUGCCCUAAAAAUCCUUAU   | 9.627578065  |
| plate 02 | G12 |                 |              |                         |              |
| plate 02 | H01 |                 |              |                         |              |
| plate 02 | H02 |                 |              |                         |              |
| plate 02 | H03 |                 |              |                         |              |
| plate 02 | H04 |                 |              |                         |              |
| plate 02 | H05 |                 |              |                         |              |
| plate 02 | H06 |                 |              |                         |              |
| plate 02 | H07 |                 |              |                         |              |
| plate 02 | H08 |                 |              |                         |              |
| plate 02 | H09 |                 |              |                         |              |
| plate 02 | H10 |                 |              |                         |              |
| plate 02 | H11 |                 |              |                         |              |
| plate 02 | H12 |                 |              |                         |              |
| plate 03 | A01 |                 |              |                         |              |

|          |     |                 |              |                         |              |
|----------|-----|-----------------|--------------|-------------------------|--------------|
| plate 03 | A02 |                 |              |                         |              |
| plate 03 | A03 |                 |              |                         |              |
| plate 03 | A04 |                 |              |                         |              |
| plate 03 | A05 |                 |              |                         |              |
| plate 03 | A06 |                 |              |                         |              |
| plate 03 | A07 |                 |              |                         |              |
| plate 03 | A08 |                 |              |                         |              |
| plate 03 | A09 |                 |              |                         |              |
| plate 03 | A10 |                 |              |                         |              |
| plate 03 | A11 |                 |              |                         |              |
| plate 03 | A12 |                 |              |                         |              |
| plate 03 | B01 |                 |              |                         |              |
| plate 03 | B02 |                 |              |                         |              |
| plate 03 | B03 |                 |              |                         |              |
| plate 03 | B04 | hsa-miR-181b-5p | MIMAT0000257 | AACAUUCAUUGCUGUCGGUGGGU | -8.196036055 |
| plate 03 | B05 | hsa-miR-30e-5p  | MIMAT0000692 | UGUAAACAUCUUGACUGGAAG   | 12.25781205  |
| plate 03 | B06 | hsa-miR-92b-3p  | MIMAT0003218 | UAUUGCACUCGUCCCGCCUCC   | -60.97955771 |
| plate 03 | B07 | hsa-miR-100-5p  | MIMAT0000098 | AACCCGUAGAUCCGAACUUGUG  | -3.417423747 |
| plate 03 | B08 | hsa-miR-137     | MIMAT0000429 | UUUAUUCUUAAGAAUACGCGUAG | -3.983066298 |
| plate 03 | B09 | hsa-miR-451a    | MIMAT0001631 | AAACCGUUACCAUUACUGAGUU  | -17.18228187 |
| plate 03 | B10 | hsa-miR-34c-5p  | MIMAT0000686 | AGGCAGUGUAGUUAGCUGAUUGC | -33.32443958 |
| plate 03 | B11 | hsa-miR-99b-5p  | MIMAT0000689 | CACCCGUAGAACCGACCUUGCG  | -6.008173357 |
| plate 03 | B12 |                 |              |                         |              |
| plate 03 | C01 |                 |              |                         |              |
| plate 03 | C02 | hsa-miR-138-5p  | MIMAT0000430 | AGCUGGUGUUGUGAAUCAGGCCG | -4.361940083 |
| plate 03 | C03 | hsa-miR-429     | MIMAT0001536 | UAAUACUGUCUGGUAAAACCGU  | 8.274301062  |
| plate 03 | C04 | hsa-miR-194-5p  | MIMAT0000460 | UGUAACAGCAACUCCAUGUGGA  | -39.35973888 |
| plate 03 | C05 | hsa-miR-203a    | MIMAT0000264 | GUGAAAUGUUUAGGACCACUAG  | -1.749845471 |
| plate 03 | C06 | hsa-miR-98-5p   | MIMAT0000096 | UGAGGUAGUAAGUUGUAUUGUU  | 3.469007502  |
| plate 03 | C07 | hsa-miR-18b-5p  | MIMAT0001412 | UAAGGUGCAUCUAGUGCAGUUAG | -4.804848873 |
| plate 03 | C08 | hsa-miR-497-5p  | MIMAT0002820 | CAGCAGCACACUGUGGUUUGU   | -6.323012136 |
| plate 03 | C09 | hsa-miR-127-3p  | MIMAT0000446 | UCGGAUCCGUCUGAGCUUGGCU  | -6.285658382 |
| plate 03 | C10 | hsa-miR-374a-5p | MIMAT0000727 | UUUAUAUACAACCUGAUAAAGUG | -19.14602205 |
| plate 03 | C11 | hsa-miR-342-3p  | MIMAT0000753 | UCUCACACAGAAAUCGCACCCGU | -51.08348119 |
| plate 03 | C12 |                 |              |                         |              |
| plate 03 | D01 |                 |              |                         |              |
| plate 03 | D02 | hsa-miR-139-5p  | MIMAT0000250 | UCUACAGUGCACGUGUCUCCAGU | -20.71221156 |
| plate 03 | D03 | hsa-miR-409-3p  | MIMAT0001639 | GAAUGUUGCUCGGUGAACCCCU  | -7.438288487 |
| plate 03 | D04 | hsa-miR-197-3p  | MIMAT0000227 | UUCACCACCUUCUCCACCCAGC  | -100.5158375 |
| plate 03 | D05 | hsa-miR-495-3p  | MIMAT0002817 | AAACAAACAUGGUGCACUUCUU  | -41.43020407 |
| plate 03 | D06 | hsa-miR-28-5p   | MIMAT0000085 | AAGGAGCUCACAGUCUAUUGAG  | -5.074329522 |
| plate 03 | D07 | hsa-miR-34b-3p  | MIMAT0004676 | CAAUCACUAACUCCACUGCCA   | -0.183655954 |
| plate 03 | D08 | hsa-miR-135b-5p | MIMAT0000758 | UAUGGCUUUUCAUCCUAUGUGA  | -8.74833798  |
| plate 03 | D09 | hsa-miR-423-5p  | MIMAT0004748 | UGAGGGGCAGAGAGCGAGACUUU | -7.577030999 |
| plate 03 | D10 | hsa-miR-363-3p  | MIMAT0000707 | AAUUGCACGGUAUCCAUCUGUA  | -18.98860266 |
| plate 03 | D11 | hsa-miR-135a-5p | MIMAT0000428 | UAUGGCUUUUUUAUCCUAUGUGA | 2.409761781  |
| plate 03 | D12 |                 |              |                         |              |
| plate 03 | E01 |                 |              |                         |              |
| plate 03 | E02 | hsa-miR-584-5p  | MIMAT0003249 | UUAUGGUUUGCCUGGGACUGAG  | -38.75407445 |

|          |     |                 |              |                          |              |
|----------|-----|-----------------|--------------|--------------------------|--------------|
| plate 03 | E03 | hsa-miR-181c-5p | MIMAT0000258 | AACAUUCAACCUUGUCGGUGAGU  | 0.237907834  |
| plate 03 | E04 | hsa-miR-532-5p  | MIMAT0002888 | CAUGCCUUGAGUGUAGGACCGU   | 8.506427958  |
| plate 03 | E05 | hsa-miR-373-3p  | MIMAT0000726 | GAAGUGCUUCGAUUUUGGGGUGU  | 16.09724427  |
| plate 03 | E06 | hsa-miR-208a-3p | MIMAT0000241 | AUAAGACGAGCAAAAAGCUUGU   | 5.189948283  |
| plate 03 | E07 | hsa-miR-885-5p  | MIMAT0004947 | UCCAUUACACUACCCUGCCUCU   | -90.55839414 |
| plate 03 | E08 | hsa-miR-574-3p  | MIMAT0003239 | CACGCUCAUGCACACACCCACA   | -53.57284204 |
| plate 03 | E09 | hsa-miR-382-5p  | MIMAT0000737 | GAAGUUGUUCGUGGUGGAUUCG   | 2.257678642  |
| plate 03 | E10 | hsa-miR-181d-5p | MIMAT0002821 | AACAUUCAUUGUUGUCGGUGGGU  | 2.428438658  |
| plate 03 | E11 | hsa-miR-129-5p  | MIMAT0000242 | CUUUUUGCGGUCUGGGCUUGC    | -19.7223371  |
| plate 03 | E12 |                 |              |                          |              |
| plate 03 | F01 |                 |              |                          |              |
| plate 03 | F02 | hsa-miR-324-5p  | MIMAT0000761 | CGCAUCCCUAGGGCAUUGGUGU   | 9.656389938  |
| plate 03 | F03 | hsa-miR-153-3p  | MIMAT0000439 | UUGCAUAGUCACAAAAGUGAUC   | -25.36809011 |
| plate 03 | F04 | hsa-miR-134-5p  | MIMAT0000447 | UGUGACUGGUUGACCAGAGGGG   | -26.95562463 |
| plate 03 | F05 | hsa-miR-339-5p  | MIMAT0000764 | UCCCUGUCCUCCAGGAGCUCACG  | 3.292911236  |
| plate 03 | F06 | hsa-miR-340-5p  | MIMAT0004692 | UUUAUAAAGCAAUGAGACUGAUU  | 0.896934769  |
| plate 03 | F07 | hsa-miR-503-5p  | MIMAT0002874 | UAGCAGCGGGAACAGUUCUGCAG  | 26.14006768  |
| plate 03 | F08 | hsa-miR-190a-5p | MIMAT0000458 | UGAUUUGUUUGAUUAUUUAGGU   | -12.84924648 |
| plate 03 | F09 | hsa-miR-483-3p  | MIMAT0002173 | UCACUCCUCUCCUCCCGUCUU    | -6.347025263 |
| plate 03 | F10 | hsa-miR-449a    | MIMAT0001541 | UGGCAGUGUAUUUGUUAGCUGGU  | -18.54836199 |
| plate 03 | F11 | hsa-miR-184     | MIMAT0000454 | UGGACGGAGAACUGAUUAAGGGU  | -0.610555993 |
| plate 03 | F12 |                 |              |                          |              |
| plate 03 | G01 |                 |              |                          |              |
| plate 03 | G02 | hsa-miR-504-5p  | MIMAT0002875 | AGACCCUGGUCUGCACUCUAUC   | -30.03464116 |
| plate 03 | G03 | hsa-miR-302b-3p | MIMAT0000715 | UAAGUGCUUCCAUGUUUUUAGUAG | 6.230517127  |
| plate 03 | G04 | hsa-miR-485-3p  | MIMAT0002176 | GUCAUACACGGCUCUCCUCUCU   | -11.87004451 |
| plate 03 | G05 | hsa-miR-376a-3p | MIMAT0000729 | AUCAUAGAGGAAAAUCCACGU    | 12.67937584  |
| plate 03 | G06 | hsa-miR-370-3p  | MIMAT0000722 | GCCUGCUGGGGUGGAACCUUGGU  | 16.34537992  |
| plate 03 | G07 | hsa-miR-590-5p  | MIMAT0003258 | GAGCUUAUUCAUAAAAGUGCAG   | 22.58345673  |
| plate 03 | G08 | hsa-miR-494-3p  | MIMAT0002816 | UGAAACAUAACACGGGAAACCUC  | -23.36432805 |
| plate 03 | G09 | hsa-miR-126-5p  | MIMAT0000444 | CAUUUUUACUUUUGGUACGCG    | -17.01418998 |
| plate 03 | G10 | hsa-miR-151a-5p | MIMAT0004697 | UCGAGGAGCUCACAGUCUAGU    | -43.68743802 |
| plate 03 | G11 | hsa-miR-151a-5p | MIMAT0004697 | UCGAGGAGCUCACAGUCUAGU    | -25.31739573 |
| plate 03 | G12 |                 |              |                          |              |
| plate 03 | H01 |                 |              |                          |              |
| plate 03 | H02 |                 |              |                          |              |
| plate 03 | H03 |                 |              |                          |              |
| plate 03 | H04 |                 |              |                          |              |
| plate 03 | H05 |                 |              |                          |              |
| plate 03 | H06 |                 |              |                          |              |
| plate 03 | H07 |                 |              |                          |              |
| plate 03 | H08 |                 |              |                          |              |
| plate 03 | H09 |                 |              |                          |              |
| plate 03 | H10 |                 |              |                          |              |
| plate 03 | H11 |                 |              |                          |              |
| plate 03 | H12 |                 |              |                          |              |
| plate 04 | A01 |                 |              |                          |              |
| plate 04 | A02 |                 |              |                          |              |
| plate 04 | A03 |                 |              |                          |              |

|          |     |                 |              |                          |              |
|----------|-----|-----------------|--------------|--------------------------|--------------|
| plate 04 | A04 |                 |              |                          |              |
| plate 04 | A05 |                 |              |                          |              |
| plate 04 | A06 |                 |              |                          |              |
| plate 04 | A07 |                 |              |                          |              |
| plate 04 | A08 |                 |              |                          |              |
| plate 04 | A09 |                 |              |                          |              |
| plate 04 | A10 |                 |              |                          |              |
| plate 04 | A11 |                 |              |                          |              |
| plate 04 | A12 |                 |              |                          |              |
| plate 04 | B01 |                 |              |                          |              |
| plate 04 | B02 |                 |              |                          |              |
| plate 04 | B03 |                 |              |                          |              |
| plate 04 | B04 | hsa-miR-302a-3p | MIMAT0000684 | UAAGUGCUUCCAUGUUUUUGGUGA | 10.86169942  |
| plate 04 | B05 | hsa-miR-28-3p   | MIMAT0004502 | CACUAGAUUGUGAGCUCCUGGA   | 0.91516449   |
| plate 04 | B06 | hsa-miR-9-3p    | MIMAT0000442 | AUAAAGCUAGAUAAACCGAAAGU  | -5.737681274 |
| plate 04 | B07 | hsa-miR-193a-3p | MIMAT0000459 | AACUGGCCUACAAAGUCCCAGU   | -31.54088015 |
| plate 04 | B08 | hsa-miR-216a-5p | MIMAT0000273 | UAAUCUCAGCUGGCAACUGUGA   | 10.46212232  |
| plate 04 | B09 | hsa-miR-372-3p  | MIMAT0000724 | AAAGUGCUGCGACAUUUGAGCGU  | -44.39732963 |
| plate 04 | B10 | hsa-miR-95-3p   | MIMAT0000094 | UUCAACGGGUUUUUUUGAGCA    | 7.224870601  |
| plate 04 | B11 | hsa-miR-590-3p  | MIMAT0004801 | UAAUUUUUGUAUAAGCUAGU     | 3.283279592  |
| plate 04 | B12 |                 |              |                          |              |
| plate 04 | C01 |                 |              |                          |              |
| plate 04 | C02 | hsa-miR-652-3p  | MIMAT0003322 | AAUGGCGCCACUAGGGUUGUG    | -4.771472252 |
| plate 04 | C03 | hsa-miR-500a-5p | MIMAT0004773 | UAAUCCUUGCUACCUGGGUGAGA  | -23.54256575 |
| plate 04 | C04 | hsa-miR-500a-5p | MIMAT0004773 | UAAUCCUUGCUACCUGGGUGAGA  | -26.58115767 |
| plate 04 | C05 | hsa-miR-217     | MIMAT0000274 | UACUGCAUCAGGAACUGAUUGGA  | 6.746281086  |
| plate 04 | C06 | hsa-miR-324-3p  | MIMAT0000762 | ACUGCCCCAGGUGCUGCUGG     | -39.91393917 |
| plate 04 | C07 | hsa-miR-423-3p  | MIMAT0001340 | AGCUCGGUCUGAGGCCCCUCAGU  | 14.8348954   |
| plate 04 | C08 | hsa-miR-433-3p  | MIMAT0001627 | AUCAUGAUGGGCUCCUCGGUGU   | 5.114110239  |
| plate 04 | C09 | hsa-miR-629-5p  | MIMAT0004810 | UGGGUUUACGUUGGGAGAACU    | 8.477781833  |
| plate 04 | C10 | hsa-miR-374b-5p | MIMAT0004955 | AUAUAAUACAACCUGCUAAGUG   | -2.760041789 |
| plate 04 | C11 | hsa-miR-151a-3p | MIMAT0000757 | CUAGACUGAAGCUCCUUGAGG    | -18.66185569 |
| plate 04 | C12 |                 |              |                          |              |
| plate 04 | D01 |                 |              |                          |              |
| plate 04 | D02 | hsa-miR-17-3p   | MIMAT0000071 | ACUGCAGUGAAGGCACUUGUAG   | -58.43670792 |
| plate 04 | D03 | hsa-miR-505-3p  | MIMAT0002876 | CGUCAACACUUGCUGGUUCCU    | -36.78278984 |
| plate 04 | D04 | hsa-miR-1       | MIMAT0000416 | UGGAAUGUAAAGAAGUAUGUAU   | -20.29176904 |
| plate 04 | D05 | hsa-miR-187-3p  | MIMAT0000262 | UCGUGUCUUGUGUUGCAGCCGG   | 4.594885764  |
| plate 04 | D06 | hsa-miR-605-5p  | MIMAT0003273 | UAAAUCCAUGGUGCCUUCUCCU   | -107.291216  |
| plate 04 | D07 | hsa-miR-219a-5p | MIMAT0000276 | UGAUUGUCCAAACGCAAUUCU    | -3.385368656 |
| plate 04 | D08 | hsa-miR-199b-5p | MIMAT0000263 | CCCAGUGUUUAGACUAUCUGUUC  | 16.79666091  |
| plate 04 | D09 | hsa-miR-615-3p  | MIMAT0003283 | UCCGAGCCUGGGUCUCCUCUU    | -49.03648743 |
| plate 04 | D10 | hsa-miR-136-5p  | MIMAT0000448 | ACUCCAUUUGUUUUGAUGAUGGA  | 3.691886679  |
| plate 04 | D11 | hsa-miR-154-5p  | MIMAT0000452 | UAGGUUAUCCGUGUUGCCUUCG   | 2.983032396  |
| plate 04 | D12 |                 |              |                          |              |
| plate 04 | E01 |                 |              |                          |              |
| plate 04 | E02 | hsa-miR-519a-3p | MIMAT0002869 | AAAGUGCAUCCUUUUGAGUGU    | 3.533861839  |
| plate 04 | E03 | hsa-miR-16-5p   | MIMAT0000069 | UAGCAGCACGUAAAUAUUGGCG   | -7.205054788 |
| plate 04 | E04 | hsa-miR-149-5p  | MIMAT0000450 | UCUGGCUCCGUGUCUUCACUCC   | -23.44775084 |

|          |     |                 |              |                         |              |
|----------|-----|-----------------|--------------|-------------------------|--------------|
| plate 04 | E05 | hsa-miR-212-3p  | MIMAT0000269 | UAACAGUCUCCAGUCACGGCC   | 3.886031482  |
| plate 04 | E06 | hsa-miR-345-5p  | MIMAT0000772 | GCUGACUCCUAGUCCAGGGCUC  | -92.73938568 |
| plate 04 | E07 | hsa-miR-193a-5p | MIMAT0004614 | UGGGUCUUUGCGGGCGAGAUGA  | 13.11242464  |
| plate 04 | E08 | hsa-miR-708-5p  | MIMAT0004926 | AAGGAGCUUACAAUCUAGCUGGG | -26.12288563 |
| plate 04 | E09 | hsa-miR-766-3p  | MIMAT0003888 | ACUCCAGCCCCACAGCCUCAGC  | -116.5221241 |
| plate 04 | E10 | hsa-miR-483-5p  | MIMAT0004761 | AAGACGGGAGGAAAGAAGGGAG  | -24.04824523 |
| plate 04 | E11 | hsa-miR-33b-5p  | MIMAT0003301 | GUGCAUUGCUGUUGCAUUGC    | 0.039255377  |
| plate 04 | E12 |                 |              |                         |              |
| plate 04 | F01 |                 |              |                         |              |
| plate 04 | F02 | hsa-miR-144-5p  | MIMAT0004600 | GGUAUCAUCAUAUACUGUAAG   | -25.92196834 |
| plate 04 | F03 | hsa-miR-208b-3p | MIMAT0004960 | AUAAGACGAACAAAAGGUUUGU  | -23.20168359 |
| plate 04 | F04 | hsa-miR-30e-3p  | MIMAT0000693 | CUUUCAGUCGGAUGUUUACAGC  | -9.753769708 |
| plate 04 | F05 | hsa-miR-499a-5p | MIMAT0002870 | UUAAGACUUGCAGUGAUGUUU   | -34.28599737 |
| plate 04 | F06 | hsa-miR-660-5p  | MIMAT0003338 | UACCAUUGCAUAUCGGAGUUG   | -16.16280572 |
| plate 04 | F07 | hsa-miR-18a-3p  | MIMAT0002891 | ACUGCCCUAAGUGCUCUUCUGG  | -23.82926796 |
| plate 04 | F08 | hsa-miR-410-3p  | MIMAT0002171 | AAUAUAACACAGAUGGCCUGU   | -8.769500704 |
| plate 04 | F09 | hsa-miR-376c-3p | MIMAT0000720 | AACAUAGAGGAAAUCCACGU    | -13.25289116 |
| plate 04 | F10 | hsa-miR-125a-3p | MIMAT0004602 | ACAGGUGAGGUUCUUGGGAGCC  | -25.07992169 |
| plate 04 | F11 | hsa-miR-517a-3p | MIMAT0002852 | AUCGUGCAUCCCUUAGAGUGU   | -79.75425883 |
| plate 04 | F12 |                 |              |                         |              |
| plate 04 | G01 |                 |              |                         |              |
| plate 04 | G02 | hsa-miR-202-3p  | MIMAT0002811 | AGAGGUAUAGGGCAUGGGAA    | -31.30610039 |
| plate 04 | G03 | hsa-miR-455-3p  | MIMAT0004784 | GCAGUCCAUGGGCAUAUACAC   | -65.87516288 |
| plate 04 | G04 | hsa-miR-1246    | MIMAT0005898 | AAUGGAUUUUUGGAGCAGG     | -13.50347341 |
| plate 04 | G05 | hsa-miR-449b-5p | MIMAT0003327 | AGGCAGUGUAUUGUUAGCUGGC  | -22.55152425 |
| plate 04 | G06 | hsa-miR-302d-3p | MIMAT0000718 | UAAGUGCUUCCAUGUUUGAGUGU | -16.32308806 |
| plate 04 | G07 | hsa-miR-532-3p  | MIMAT0004780 | CCUCCACACCCAAGGCUUGCA   | -55.25589364 |
| plate 04 | G08 | hsa-miR-422a    | MIMAT0001339 | ACUGGACUUAGGGUCAGAAGGC  | -28.44359328 |
| plate 04 | G09 | hsa-miR-30a-3p  | MIMAT0000088 | CUUUCAGUCGGAUGUUUGCAGC  | -16.88294749 |
| plate 04 | G10 | hsa-miR-211-5p  | MIMAT0000268 | UUCCCUUUGUCAUCCUUCGCCU  | -17.57374179 |
| plate 04 | G11 | hsa-miR-582-5p  | MIMAT0003247 | UUACAGUUGUUAACCAGUUACU  | -27.72796651 |
| plate 04 | G12 |                 |              |                         |              |
| plate 04 | H01 |                 |              |                         |              |
| plate 04 | H02 |                 |              |                         |              |
| plate 04 | H03 |                 |              |                         |              |
| plate 04 | H04 |                 |              |                         |              |
| plate 04 | H05 |                 |              |                         |              |
| plate 04 | H06 |                 |              |                         |              |
| plate 04 | H07 |                 |              |                         |              |
| plate 04 | H08 |                 |              |                         |              |
| plate 04 | H09 |                 |              |                         |              |
| plate 04 | H10 |                 |              |                         |              |
| plate 04 | H11 |                 |              |                         |              |
| plate 04 | H12 |                 |              |                         |              |
| plate 05 | A01 |                 |              |                         |              |
| plate 05 | A02 |                 |              |                         |              |
| plate 05 | A03 |                 |              |                         |              |
| plate 05 | A04 |                 |              |                         |              |
| plate 05 | A05 |                 |              |                         |              |

|          |     |                  |              |                           |              |
|----------|-----|------------------|--------------|---------------------------|--------------|
| plate 05 | A06 |                  |              |                           |              |
| plate 05 | A07 |                  |              |                           |              |
| plate 05 | A08 |                  |              |                           |              |
| plate 05 | A09 |                  |              |                           |              |
| plate 05 | A10 |                  |              |                           |              |
| plate 05 | A11 |                  |              |                           |              |
| plate 05 | A12 |                  |              |                           |              |
| plate 05 | B01 |                  |              |                           |              |
| plate 05 | B02 |                  |              |                           |              |
| plate 05 | B03 |                  |              |                           |              |
| plate 05 | B04 | hsa-miR-361-5p   | MIMAT0000703 | UUAUCAGAAUCUCCAGGGGUAC    | 7.754317348  |
| plate 05 | B05 | hsa-miR-638      | MIMAT0003308 | AGGGAUCGCGGGCGGGUGGCGGCCU | 8.814047041  |
| plate 05 | B06 | hsa-miR-299-5p   | MIMAT0002890 | UGGUUUACCGUCCCAUAUACAU    | 27.25512976  |
| plate 05 | B07 | hsa-miR-542-5p   | MIMAT0003340 | UCGGGGAUCAUCAUGUCACGAGA   | 11.24309038  |
| plate 05 | B08 | hsa-miR-425-3p   | MIMAT0001343 | AUCGGGAAUGUCGUGUCCGCC     | -5.146998632 |
| plate 05 | B09 | hsa-miR-379-5p   | MIMAT0000733 | UGGUAGACUAUGGAACGUAGG     | 2.652135625  |
| plate 05 | B10 | hsa-miR-491-5p   | MIMAT0002807 | AGUGGGGAACCCUCCAUGAGG     | 1.047657242  |
| plate 05 | B11 | hsa-miR-377-3p   | MIMAT0000730 | AUCACACAAAGGCAACUUUUGU    | 5.779231249  |
| plate 05 | B12 |                  |              |                           |              |
| plate 05 | C01 |                  |              |                           |              |
| plate 05 | C02 | hsa-miR-675-5p   | MIMAT0004284 | UGGUGCGGAGAGGGCCACAGUG    | 4.615314649  |
| plate 05 | C03 | hsa-miR-489-3p   | MIMAT0002805 | GUGACAUCACAUAUACGGCAGC    | -8.303861944 |
| plate 05 | C04 | hsa-miR-361-3p   | MIMAT0004682 | UCCCCAGGUGUGAUUCUGAUUU    | -86.24608782 |
| plate 05 | C05 | hsa-miR-487b-3p  | MIMAT0003180 | AAUCGUACAGGGUCAUCCACUU    | -19.37744188 |
| plate 05 | C06 | hsa-miR-574-5p   | MIMAT0004795 | UGAGUGUGUGUGUGAGUGUGU     | 11.56755818  |
| plate 05 | C07 | hsa-miR-519d-3p  | MIMAT0002853 | CAAAGUGCCUCCUUUAGAGUG     | 10.05684802  |
| plate 05 | C08 | hsa-miR-513a-5p  | MIMAT0002877 | UUCACAGGGAGGUGUCAU        | -13.50278865 |
| plate 05 | C09 | hsa-miR-339-3p   | MIMAT0004702 | UGAGCGCCUCGACGACAGAGCCG   | 4.606384342  |
| plate 05 | C10 | hsa-miR-378a-5p  | MIMAT0000731 | CUCCUGACUCCAGGUCCUGUGU    | 12.50226358  |
| plate 05 | C11 | hsa-miR-744-5p   | MIMAT0004945 | UGCGGGGCUAGGGCUAACAGCA    | 12.9681279   |
| plate 05 | C12 |                  |              |                           |              |
| plate 05 | D01 |                  |              |                           |              |
| plate 05 | D02 | hsa-miR-30c-1-3p | MIMAT0004674 | CUGGGAGAGGGUUGUUUACUCC    | 17.29188458  |
| plate 05 | D03 | hsa-miR-520b     | MIMAT0002843 | AAAGUGCUUCCUUUAGAGGG      | 18.34417235  |
| plate 05 | D04 | hsa-miR-542-3p   | MIMAT0003389 | UGUGACAGAUUGAUAACUGAAA    | 8.273763504  |
| plate 05 | D05 | hsa-miR-450a-5p  | MIMAT0001545 | UUUUGCGAUGUGUCCUAAUUAU    | 12.36235545  |
| plate 05 | D06 | hsa-miR-320b     | MIMAT0005792 | AAAAGCUGGGUUGAGAGGGCAA    | -2.488744093 |
| plate 05 | D07 | hsa-miR-381-3p   | MIMAT0000736 | UAUACAAGGGCAAGCUCUCUGU    | 15.94043155  |
| plate 05 | D08 | hsa-miR-432-5p   | MIMAT0002814 | UCUUGGAGUAGGUCAUUGGGUGG   | -14.0133045  |
| plate 05 | D09 | hsa-miR-376b-3p  | MIMAT0002172 | AUCAUAGAGGAAAAUCCAUGUU    | 6.710959884  |
| plate 05 | D10 | hsa-miR-650      | MIMAT0003320 | AGGAGGCAGCGCUCUCAGGAC     | 6.303142558  |
| plate 05 | D11 | hsa-miR-146b-3p  | MIMAT0004766 | UGCCCUGUGGACUCAGUUCUGG    | -6.272217238 |
| plate 05 | D12 |                  |              |                           |              |
| plate 05 | E01 |                  |              |                           |              |
| plate 05 | E02 | hsa-miR-223-5p   | MIMAT0004570 | CGUGUAUUUGACAAGCUGAGUU    | 14.09334651  |
| plate 05 | E03 | hsa-miR-7-1-3p   | MIMAT0004553 | CAACAAAUCACAGUCUGCCAUA    | 21.79424739  |
| plate 05 | E04 | hsa-miR-493-3p   | MIMAT0003161 | UGAAGGUCUACUGUGUGCCAGG    | 7.720084507  |
| plate 05 | E05 | hsa-miR-302c-3p  | MIMAT0000717 | UAAGUGCUUCCAUGUUUCAGUGG   | 16.7560662   |
| plate 05 | E06 | hsa-miR-342-5p   | MIMAT0004694 | AGGGGUGCUAUCUGUGAUUGA     | 8.46874186   |

|          |     |                  |              |                           |              |
|----------|-----|------------------|--------------|---------------------------|--------------|
| plate 05 | E07 | hsa-let-7b-3p    | MIMAT0004482 | CUAUACAACCUACUGCCUUCCC    | -73.66030934 |
| plate 05 | E08 | hsa-miR-520g-3p  | MIMAT0002858 | ACAAAGUGCUUCCCUUAGAGUGU   | 9.340935119  |
| plate 05 | E09 | hsa-miR-520g-3p  | MIMAT0002858 | ACAAAGUGCUUCCCUUAGAGUGU   | 8.430043866  |
| plate 05 | E10 | hsa-miR-20a-3p   | MIMAT0004493 | ACUGCAUUUAGAGCACUAAAAG    | 5.750951946  |
| plate 05 | E11 | hsa-miR-625-5p   | MIMAT0003294 | AGGGGGAAAGUUCUAUAGUCC     | 8.566975231  |
| plate 05 | E12 |                  |              |                           |              |
| plate 05 | F01 |                  |              |                           |              |
| plate 05 | F02 | hsa-miR-874-3p   | MIMAT0004911 | CUGCCUGGCCCGAGGGACCGA     | 20.49191104  |
| plate 05 | F03 | hsa-miR-21-3p    | MIMAT0004494 | CAACACCAGUCGAUGGGCUGU     | 1.815663592  |
| plate 05 | F04 | hsa-miR-1290     | MIMAT0005880 | UGGAUUUUUGGAUCAGGGA       | 11.24606715  |
| plate 05 | F05 | hsa-miR-383-5p   | MIMAT0000738 | AGAUCAGAAGGUGAUUGUGGCU    | 9.104281999  |
| plate 05 | F06 | hsa-miR-506-3p   | MIMAT0002878 | UAAGGCACCCUUCUGAGUAGA     | 20.53209742  |
| plate 05 | F07 | hsa-miR-512-3p   | MIMAT0002823 | AAGUGCUGUCAUAGCUGAGGUC    | 8.958420328  |
| plate 05 | F08 | hsa-miR-608      | MIMAT0003276 | AGGGGUGGUGUUGGGACAGCUCCGU | 12.64663687  |
| plate 05 | F09 | hsa-miR-502-3p   | MIMAT0004775 | AAUGCACCUGGGCAAGGAUUCA    | -6.992595288 |
| plate 05 | F10 | hsa-miR-431-5p   | MIMAT0001625 | UGUCUUGCAGGCCGUAUGCA      | 14.34934863  |
| plate 05 | F11 | hsa-miR-34c-3p   | MIMAT0004677 | AAUCACUAACCACACGGCCAGG    | 25.73548929  |
| plate 05 | F12 |                  |              |                           |              |
| plate 05 | G01 |                  |              |                           |              |
| plate 05 | G02 | hsa-miR-517c-3p  | MIMAT0002866 | AUCGUGCAUCCUUUAGAGUGU     | 20.21060639  |
| plate 05 | G03 | hsa-miR-1296-5p  | MIMAT0005794 | UUAGGGCCCUGGCUCCAUCUCC    | 8.596742919  |
| plate 05 | G04 | hsa-miR-7-5p     | MIMAT0000252 | UGGAAGACUAGUGAUUUUGUUGU   | 26.50200725  |
| plate 05 | G05 | hsa-miR-320c     | MIMAT0005793 | AAAAGCUGGGUUGAGAGGGU      | 21.70047918  |
| plate 05 | G06 | hsa-miR-598-3p   | MIMAT0003266 | UACGUCAUCGUUGUCAUCGUCA    | 31.26037218  |
| plate 05 | G07 | hsa-miR-129-2-3p | MIMAT0004605 | AAGCCCUUACCCCAAAAAGCAU    | 11.44551066  |
| plate 05 | G08 | hsa-miR-34b-5p   | MIMAT0000685 | UAGGCAGUGUCAUUAGCUGAUUG   | 19.89060375  |
| plate 05 | G09 | hsa-miR-296-3p   | MIMAT0004679 | GAGGGUUGGGUGGAGGCUCUCC    | 14.52795475  |
| plate 05 | G10 | hsa-miR-486-3p   | MIMAT0004762 | CGGGGCAGCUCAGUACAGGAU     | 10.86355236  |
| plate 05 | G11 | hsa-miR-664a-3p  | MIMAT0005949 | UAUUCAUUUAUCCCCAGCCUACA   | -9.859223642 |
| plate 05 | G12 |                  |              |                           |              |
| plate 05 | H01 |                  |              |                           |              |
| plate 05 | H02 |                  |              |                           |              |
| plate 05 | H03 |                  |              |                           |              |
| plate 05 | H04 |                  |              |                           |              |
| plate 05 | H05 |                  |              |                           |              |
| plate 05 | H06 |                  |              |                           |              |
| plate 05 | H07 |                  |              |                           |              |
| plate 05 | H08 |                  |              |                           |              |
| plate 05 | H09 |                  |              |                           |              |
| plate 05 | H10 |                  |              |                           |              |
| plate 05 | H11 |                  |              |                           |              |
| plate 05 | H12 |                  |              |                           |              |
| plate 06 | A01 |                  |              |                           |              |
| plate 06 | A02 |                  |              |                           |              |
| plate 06 | A03 |                  |              |                           |              |
| plate 06 | A04 |                  |              |                           |              |
| plate 06 | A05 |                  |              |                           |              |
| plate 06 | A06 |                  |              |                           |              |
| plate 06 | A07 |                  |              |                           |              |

|          |     |                  |              |                          |              |
|----------|-----|------------------|--------------|--------------------------|--------------|
| plate 06 | A08 |                  |              |                          |              |
| plate 06 | A09 |                  |              |                          |              |
| plate 06 | A10 |                  |              |                          |              |
| plate 06 | A11 |                  |              |                          |              |
| plate 06 | A12 |                  |              |                          |              |
| plate 06 | B01 |                  |              |                          |              |
| plate 06 | B02 |                  |              |                          |              |
| plate 06 | B03 |                  |              |                          |              |
| plate 06 | B04 | hsa-miR-512-5p   | MIMAT0002822 | CACUCAGCCUUGAGGGCACUUUC  | -93.05454864 |
| plate 06 | B05 | hsa-miR-661      | MIMAT0003324 | UGCCUGGGUCUCUGGCCUGCGCGU | 13.67662535  |
| plate 06 | B06 | hsa-miR-323a-3p  | MIMAT0000755 | CACAUUACACGGUCGACCUCU    | -0.967317587 |
| plate 06 | B07 | hsa-miR-16-2-3p  | MIMAT0004518 | CCAUAUUACUGUGCUGCUUUA    | 18.65967025  |
| plate 06 | B08 | hsa-miR-622      | MIMAT0003291 | ACAGUCUGCUGAGGUUGGAGC    | 11.49117166  |
| plate 06 | B09 | hsa-miR-149-3p   | MIMAT0004609 | AGGGAGGGACGGGGCUGUGC     | 3.468486904  |
| plate 06 | B10 | hsa-miR-671-5p   | MIMAT0003880 | AGGAAGCCCUGGAGGGGCUGGAG  | -1.125175398 |
| plate 06 | B11 | hsa-miR-105-5p   | MIMAT0000102 | UCAAAUGCUCAGACUCCUGUGGU  | -24.25485267 |
| plate 06 | B12 |                  |              |                          |              |
| plate 06 | C01 |                  |              |                          |              |
| plate 06 | C02 | hsa-miR-582-3p   | MIMAT0004797 | UAACUGGUUGAACACUGAACCC   | 9.028589804  |
| plate 06 | C03 | hsa-miR-491-3p   | MIMAT0004765 | CUUAUGCAAGAUUCCCUUCUAC   | 13.990587    |
| plate 06 | C04 | hsa-miR-498      | MIMAT0002824 | UUUCAAGCCAGGGGCGUUUUUC   | -82.11851029 |
| plate 06 | C05 | hsa-miR-367-3p   | MIMAT0000719 | AAUUGCACUUUAGCAAUGGUGA   | 7.125526193  |
| plate 06 | C06 | hsa-miR-1275     | MIMAT0005929 | GUGGGGGAGAGGCUGUC        | 9.949427035  |
| plate 06 | C07 | hsa-miR-320d     | MIMAT0006764 | AAAAGCUGGGUUGAGAGGA      | 3.001929373  |
| plate 06 | C08 | hsa-miR-1271-5p  | MIMAT0005796 | CUUGGCACCUAGCAAGCACUCA   | -98.49713517 |
| plate 06 | C09 | hsa-miR-873-5p   | MIMAT0004953 | GCAGGAACUUGUGAGUCUCCU    | 6.460769411  |
| plate 06 | C10 | hsa-miR-337-3p   | MIMAT0000754 | CUCCUAUAUGAUGCCUUCUUC    | 7.09395463   |
| plate 06 | C11 | hsa-miR-301b     | MIMAT0004958 | CAGUGCAAUGAUUUGUCAAAAGC  | 3.603543031  |
| plate 06 | C12 |                  |              |                          |              |
| plate 06 | D01 |                  |              |                          |              |
| plate 06 | D02 | hsa-miR-455-5p   | MIMAT0003150 | UAUGUGCCUUUGGACUACAUCG   | -7.343019177 |
| plate 06 | D03 | hsa-miR-450b-5p  | MIMAT0004909 | UUUUGCAAUAUGUCCUGAAUA    | 21.99222404  |
| plate 06 | D04 | hsa-miR-539-5p   | MIMAT0003163 | GGAGAAUUUAUCCUUGGUGUGU   | 13.13815482  |
| plate 06 | D05 | hsa-miR-330-3p   | MIMAT0000751 | GCAAAGCACACGGCCUGCAGAGA  | -52.81659261 |
| plate 06 | D06 | hsa-miR-485-5p   | MIMAT0002175 | AGAGGCUGGCCGUGAUGAAUUC   | -8.391896632 |
| plate 06 | D07 | hsa-miR-520c-3p  | MIMAT0002846 | AAAGUGCUUCCUUUAGAGGGU    | 15.23590973  |
| plate 06 | D08 | hsa-miR-29c-5p   | MIMAT0004673 | UGACCGAUUUCUCCUGGUGUUC   | 2.612546773  |
| plate 06 | D09 | hsa-miR-454-3p   | MIMAT0003885 | UAGUGCAAUAUUGCUUAUAGGGU  | 17.44416511  |
| plate 06 | D10 | hsa-miR-92a-1-5p | MIMAT0004507 | AGGUUGGGAUCGGUUGCAAUGCU  | 8.618159495  |
| plate 06 | D11 | hsa-miR-1224-5p  | MIMAT0005458 | GUGAGGACUCGGGAGGUGG      | -16.48123246 |
| plate 06 | D12 |                  |              |                          |              |
| plate 06 | E01 |                  |              |                          |              |
| plate 06 | E02 | hsa-miR-765      | MIMAT0003945 | UGGAGGAGAAGGAAGGUGAUG    | 18.84734565  |
| plate 06 | E03 | hsa-miR-767-5p   | MIMAT0003882 | UGCACCAUGGUUGUCUGAGCAUG  | 1.358454163  |
| plate 06 | E04 | hsa-miR-550a-5p  | MIMAT0004800 | AGUGCCUGAGGGAGUAAGAGCCC  | -7.730647802 |
| plate 06 | E05 | hsa-miR-550a-5p  | MIMAT0004800 | AGUGCCUGAGGGAGUAAGAGCCC  | -1.344422357 |
| plate 06 | E06 | hsa-miR-369-5p   | MIMAT0001621 | AGAUCGACCGUGUUAUUAUUCGC  | 31.68469364  |
| plate 06 | E07 | hsa-miR-939-5p   | MIMAT0004982 | UGGGGAGCUGAGGCUCUGGGGGUG | 10.00380028  |
| plate 06 | E08 | hsa-miR-769-5p   | MIMAT0003886 | UGAGACCUCUGGGUUCUGAGCU   | 17.36699018  |

|          |     |                  |              |                         |              |
|----------|-----|------------------|--------------|-------------------------|--------------|
| plate 06 | E09 | hsa-miR-570-3p   | MIMAT0003235 | CGAAAACAGCAAUUACCUUUGC  | -51.24327643 |
| plate 06 | E10 | hsa-miR-518b     | MIMAT0002844 | CAAAGCGCUCCCUUUAGAGGU   | 4.010465388  |
| plate 06 | E11 | hsa-miR-24-1-5p  | MIMAT0000079 | UGCCUACUGAGCUGAUUCAGU   | 10.1107928   |
| plate 06 | E12 |                  |              |                         |              |
| plate 06 | F01 |                  |              |                         |              |
| plate 06 | F02 | hsa-miR-29b-2-5p | MIMAT0004515 | CUGGUUUCACAUGGUGGCUUAG  | -32.65990412 |
| plate 06 | F03 | hsa-miR-516a-5p  | MIMAT0004770 | UUCUCGAGGAAAGAAGCACUUUC | -22.09220065 |
| plate 06 | F04 | hsa-miR-106b-3p  | MIMAT0004672 | CCGACUCUGGGUACUUGCUGC   | -46.3917797  |
| plate 06 | F05 | hsa-miR-299-3p   | MIMAT0000687 | UAUGUGGGAUGGUAAACCGCUU  | 23.35681712  |
| plate 06 | F06 | hsa-miR-492      | MIMAT0002812 | AGGACCUGCGGGACAAGAUUCUU | -32.32664874 |
| plate 06 | F07 | hsa-miR-181a-3p  | MIMAT0000270 | ACCAUCGACCGUUGAUUGUACC  | 24.23555893  |
| plate 06 | F08 | hsa-miR-34a-3p   | MIMAT0004557 | CAAUCAGCAAGUAUCUGCCCU   | -76.86184518 |
| plate 06 | F09 | hsa-miR-551b-3p  | MIMAT0003233 | GCGACCAUACUUGGUUUCAG    | -4.803262395 |
| plate 06 | F10 | hsa-miR-572      | MIMAT0003237 | GUCCGCUCGGCGGUGGCCCA    | 15.75508653  |
| plate 06 | F11 | hsa-miR-548c-5p  | MIMAT0004806 | AAAAGUAAUUGCGGUUUUUGCC  | 11.45433817  |
| plate 06 | F12 |                  |              |                         |              |
| plate 06 | G01 |                  |              |                         |              |
| plate 06 | G02 | hsa-miR-561-3p   | MIMAT0003225 | CAAAGUUUAAGAUCCUUGAAGU  | 21.87821562  |
| plate 06 | G03 | hsa-miR-411-5p   | MIMAT0003329 | UAGUAGACCGUAUAGCGUACG   | 13.96778531  |
| plate 06 | G04 | hsa-miR-188-5p   | MIMAT0000457 | CAUCCUUGCAUGGUGGAGGG    | 19.72257951  |
| plate 06 | G05 | hsa-miR-31-3p    | MIMAT0004504 | UGCUAUGCCAACAUUUGCCAU   | 29.62728017  |
| plate 06 | G06 | hsa-miR-329-3p   | MIMAT0001629 | AACACACCGGUUAACCUCUUU   | -0.346410196 |
| plate 06 | G07 | hsa-miR-139-3p   | MIMAT0004552 | UGGAGACGCGGCCCUUGGAGU   | 4.085886342  |
| plate 06 | G08 | hsa-miR-760      | MIMAT0004957 | CGGCUCUGGGUCUGUGGGGA    | 13.23462348  |
| plate 06 | G09 | hsa-miR-484      | MIMAT0002174 | UCAGGCUCAGUCCCCUCCGAU   | -56.91037184 |
| plate 06 | G10 | hsa-miR-548b-5p  | MIMAT0004798 | AAAAGUAAUUGUGGUUUUGGCC  | 17.03198082  |
| plate 06 | G11 | hsa-miR-490-3p   | MIMAT0002806 | CAACCUGGAGGACUCCAUGCUG  | -1.58296305  |
| plate 06 | G12 |                  |              |                         |              |
| plate 06 | H01 |                  |              |                         |              |
| plate 06 | H02 |                  |              |                         |              |
| plate 06 | H03 |                  |              |                         |              |
| plate 06 | H04 |                  |              |                         |              |
| plate 06 | H05 |                  |              |                         |              |
| plate 06 | H06 |                  |              |                         |              |
| plate 06 | H07 |                  |              |                         |              |
| plate 06 | H08 |                  |              |                         |              |
| plate 06 | H09 |                  |              |                         |              |
| plate 06 | H10 |                  |              |                         |              |
| plate 06 | H11 |                  |              |                         |              |
| plate 06 | H12 |                  |              |                         |              |
| plate 07 | A01 |                  |              |                         |              |
| plate 07 | A02 |                  |              |                         |              |
| plate 07 | A03 |                  |              |                         |              |
| plate 07 | A04 |                  |              |                         |              |
| plate 07 | A05 |                  |              |                         |              |
| plate 07 | A06 |                  |              |                         |              |
| plate 07 | A07 |                  |              |                         |              |
| plate 07 | A08 |                  |              |                         |              |
| plate 07 | A09 |                  |              |                         |              |

|          |     |                  |              |                          |              |
|----------|-----|------------------|--------------|--------------------------|--------------|
| plate 07 | A10 |                  |              |                          |              |
| plate 07 | A11 |                  |              |                          |              |
| plate 07 | A12 |                  |              |                          |              |
| plate 07 | B01 |                  |              |                          |              |
| plate 07 | B02 |                  |              |                          |              |
| plate 07 | B03 |                  |              |                          |              |
| plate 07 | B04 | hsa-miR-22-5p    | MIMAT0004495 | AGUUCUUCAGUGGCAAGCUUUA   | 13.39313518  |
| plate 07 | B05 | hsa-miR-510-5p   | MIMAT0002882 | UACUCAGGAGAGUGGCAAUCAC   | 0.313702013  |
| plate 07 | B06 | hsa-miR-603      | MIMAT0003271 | CACACACUGCAAUUACUUUUGC   | 27.43373991  |
| plate 07 | B07 | hsa-miR-885-3p   | MIMAT0004948 | AGGCAGCGGGGUGUAGUGGAUA   | 6.108362609  |
| plate 07 | B08 | hsa-miR-511-5p   | MIMAT0002808 | GUGUCUUUUGCUCUGCAGUCA    | -12.74204725 |
| plate 07 | B09 | hsa-miR-615-5p   | MIMAT0004804 | GGGGGUCCCCGGUGCUCGGAUC   | -9.126305356 |
| plate 07 | B10 | hsa-miR-642a-5p  | MIMAT0003312 | GUCCCUCUCCAAUUGUGUCUUG   | -11.27167186 |
| plate 07 | B11 | hsa-miR-544a     | MIMAT0003164 | AUUCUGCAUUUUUAGCAAGUUC   | -5.842138042 |
| plate 07 | B12 |                  |              |                          |              |
| plate 07 | C01 |                  |              |                          |              |
| plate 07 | C02 | hsa-miR-1285-3p  | MIMAT0005876 | UCUGGGCAACAAAGUGAGACCU   | -90.71338974 |
| plate 07 | C03 | hsa-miR-592      | MIMAT0003260 | UUGUGUCAUAUGCGAUGAUGU    | 8.320833498  |
| plate 07 | C04 | hsa-miR-214-5p   | MIMAT0004564 | UGCCUGUCUACACUUGCUGUGC   | -10.61444367 |
| plate 07 | C05 | hsa-miR-16-1-3p  | MIMAT0004489 | CCAGUAUUAAACUGUGCUGCUGA  | 21.7574988   |
| plate 07 | C06 | hsa-miR-340-3p   | MIMAT0000750 | UCCGUCUCAGUUACUUUAUAGC   | -6.201343842 |
| plate 07 | C07 | hsa-miR-127-5p   | MIMAT0004604 | CUGAAGCUCAGAGGGCUCUGAU   | -52.74612615 |
| plate 07 | C08 | hsa-miR-193b-5p  | MIMAT0004767 | CGGGGUUUUGAGGGCGAGAUGA   | 18.88582606  |
| plate 07 | C09 | hsa-miR-23b-5p   | MIMAT0004587 | UGGGUUCUGGCAUGCUGAUUU    | -84.4904453  |
| plate 07 | C10 | hsa-miR-616-3p   | MIMAT0004805 | AGUCAUUGGAGGGUUUGAGCAG   | -1.300750429 |
| plate 07 | C11 | hsa-miR-637      | MIMAT0003307 | ACUGGGGGCUUUCGGGCUCUGCGU | 7.933996483  |
| plate 07 | C12 |                  |              |                          |              |
| plate 07 | D01 |                  |              |                          |              |
| plate 07 | D02 | hsa-miR-488-3p   | MIMAT0004763 | UUGAAAGGCUAUUUCUUGGUC    | 13.46023956  |
| plate 07 | D03 | hsa-miR-518c-3p  | MIMAT0002848 | CAAAGCGCUUCUCUUUAGAGUGU  | 15.09048127  |
| plate 07 | D04 | hsa-miR-216b-5p  | MIMAT0004959 | AAAUCUCUGCAGGCAAUUGUGA   | -48.9389394  |
| plate 07 | D05 | hsa-miR-625-3p   | MIMAT0004808 | GACUAUAGAACUUUCCCCUCA    | -34.42663035 |
| plate 07 | D06 | hsa-miR-516a-3p  | MIMAT0006778 | UGCUCUUUUCAGAGGGU        | 22.75814353  |
| plate 07 | D07 | hsa-miR-802      | MIMAT0004185 | CAGUAACAAAGAUUCAUCCUUGU  | 35.82573475  |
| plate 07 | D08 | hsa-miR-1291     | MIMAT0005881 | UGGCCUGACUGAAGACCAGCAGU  | -28.04974057 |
| plate 07 | D09 | hsa-miR-331-5p   | MIMAT0004700 | CUAGGU AUGGUCCAGGGAUCC   | -9.448011649 |
| plate 07 | D10 | hsa-miR-190b     | MIMAT0004929 | UGAU AUGUUUGAU AUUGGGUU  | -0.448130068 |
| plate 07 | D11 | hsa-miR-155-3p   | MIMAT0004658 | CUCCUACAU AUUAGCAUUAACA  | -8.443419604 |
| plate 07 | D12 |                  |              |                          |              |
| plate 07 | E01 |                  |              |                          |              |
| plate 07 | E02 | hsa-miR-371a-5p  | MIMAT0004687 | ACUCAACUGUGGGGGCACU      | -25.74056043 |
| plate 07 | E03 | hsa-miR-758-3p   | MIMAT0003879 | UUUGUGACCUGGUCCACUAACC   | 13.29642592  |
| plate 07 | E04 | hsa-miR-362-5p   | MIMAT0000705 | AAUCCUUGGAACCUAGGUGUGAGU | -28.80565168 |
| plate 07 | E05 | hsa-let-7i-3p    | MIMAT0004585 | CUGCGCAAGCUACUGCCUUGCU   | -55.62371986 |
| plate 07 | E06 | hsa-miR-769-3p   | MIMAT0003887 | CUGGGAUCUCCGGGUCUUGGUU   | -4.255316816 |
| plate 07 | E07 | hsa-miR-362-3p   | MIMAT0004683 | AACACACCUAUUCAAGGAUUCA   | 18.33912273  |
| plate 07 | E08 | hsa-miR-519e-3p  | MIMAT0002829 | AAGUGCCUCCUUUAGAGUGUU    | 11.1471121   |
| plate 07 | E09 | hsa-miR-224-5p   | MIMAT0000281 | CAAGUCACUAGUGGUUCCGUU    | 20.27330781  |
| plate 07 | E10 | hsa-miR-29b-1-5p | MIMAT0004514 | GCUGGUUCAUAUGGUGGUUAGA   | -6.795414973 |

|          |     |                   |              |                           |              |
|----------|-----|-------------------|--------------|---------------------------|--------------|
| plate 07 | E11 | hsa-miR-509-3p    | MIMAT0002881 | UGAUUGGUACGUCUGUGGGUAG    | -4.985570365 |
| plate 07 | E12 |                   |              |                           |              |
| plate 07 | F01 |                   |              |                           |              |
| plate 07 | F02 | hsa-miR-181a-2-3p | MIMAT0004558 | ACCACUGACCGUUGACUGUACC    | -25.02806981 |
| plate 07 | F03 | hsa-miR-496       | MIMAT0002818 | UGAGUAUUACAUGGCCAAUCUC    | -13.52361592 |
| plate 07 | F04 | hsa-miR-518c-5p   | MIMAT0002847 | UCUCUGGAGGGAAGCACUUUCUG   | -26.26752718 |
| plate 07 | F05 | hsa-miR-596       | MIMAT0003264 | AAGCCUGCCCGGUCCUCGGG      | -42.86994031 |
| plate 07 | F06 | hsa-miR-409-5p    | MIMAT0001638 | AGGUUACCCGAGCAACUUUGCAU   | -38.47065609 |
| plate 07 | F07 | hsa-miR-557       | MIMAT0003221 | GUUUGCACGGGUGGGCCUUGUCU   | -71.7011399  |
| plate 07 | F08 | hsa-miR-1224-3p   | MIMAT0005459 | CCCCACCUCCUCUCUCCUCAG     | -26.23002768 |
| plate 07 | F09 | hsa-miR-297       | MIMAT0004450 | AUGUAUGUGUGCAUGUGCAUG     | -28.38920979 |
| plate 07 | F10 | hsa-miR-1228-3p   | MIMAT0005583 | UCACACCUCCUCGCCCCCC       | -77.77408631 |
| plate 07 | F11 | hsa-miR-30c-2-3p  | MIMAT0004550 | CUGGGAGAAGGCUGUUUACUCU    | -6.493445262 |
| plate 07 | F12 |                   |              |                           |              |
| plate 07 | G01 |                   |              |                           |              |
| plate 07 | G02 | hsa-miR-25-5p     | MIMAT0004498 | AGGCGGAGACUUGGGCAAUUG     | -17.84790112 |
| plate 07 | G03 | hsa-miR-369-3p    | MIMAT0000721 | AAUAAUACAUGGUUGAUCUUU     | -4.162554879 |
| plate 07 | G04 | hsa-miR-513a-3p   | MIMAT0004777 | UAAAUUUCACCUUUCUGAGAAGG   | 8.048468661  |
| plate 07 | G05 | hsa-miR-1228-5p   | MIMAT0005582 | GUGGGCGGGGCAGGUGUGUG      | 9.355030416  |
| plate 07 | G06 | hsa-miR-509-5p    | MIMAT0004779 | UACUGCAGACAGUGGCAAUCA     | -32.25560629 |
| plate 07 | G07 | hsa-miR-942-5p    | MIMAT0004985 | UCUUCUCUGUUUUGGCAUGUG     | 21.02724526  |
| plate 07 | G08 | hsa-miR-10a-3p    | MIMAT0004555 | CAAUUCGUUUCUAGGGGAAUA     | 20.69567067  |
| plate 07 | G09 | hsa-miR-665       | MIMAT0004952 | ACCAGGAGGCUGAGGCCCCU      | -42.70612667 |
| plate 07 | G10 | hsa-miR-612       | MIMAT0003280 | GCUGGGCAGGGCUUCUGAGCUCCUU | -15.41240685 |
| plate 07 | G11 | hsa-miR-363-5p    | MIMAT0003385 | CGGGUGGAUCACGAUGCAAUUU    | -13.60650956 |
| plate 07 | G12 |                   |              |                           |              |
| plate 07 | H01 |                   |              |                           |              |
| plate 07 | H02 |                   |              |                           |              |
| plate 07 | H03 |                   |              |                           |              |
| plate 07 | H04 |                   |              |                           |              |
| plate 07 | H05 |                   |              |                           |              |
| plate 07 | H06 |                   |              |                           |              |
| plate 07 | H07 |                   |              |                           |              |
| plate 07 | H08 |                   |              |                           |              |
| plate 07 | H09 |                   |              |                           |              |
| plate 07 | H10 |                   |              |                           |              |
| plate 07 | H11 |                   |              |                           |              |
| plate 07 | H12 |                   |              |                           |              |
| plate 08 | A01 |                   |              |                           |              |
| plate 08 | A02 |                   |              |                           |              |
| plate 08 | A03 |                   |              |                           |              |
| plate 08 | A04 |                   |              |                           |              |
| plate 08 | A05 |                   |              |                           |              |
| plate 08 | A06 |                   |              |                           |              |
| plate 08 | A07 |                   |              |                           |              |
| plate 08 | A08 |                   |              |                           |              |
| plate 08 | A09 |                   |              |                           |              |
| plate 08 | A10 |                   |              |                           |              |
| plate 08 | A11 |                   |              |                           |              |

|          |     |                   |              |                           |              |
|----------|-----|-------------------|--------------|---------------------------|--------------|
| plate 08 | A12 |                   |              |                           |              |
| plate 08 | B01 |                   |              |                           |              |
| plate 08 | B02 |                   |              |                           |              |
| plate 08 | B03 |                   |              |                           |              |
| plate 08 | B04 | hsa-miR-921       | MIMAT0004971 | CUAGUGAGGGACAGAACCAGGAUUC | -33.74250126 |
| plate 08 | B05 | hsa-miR-200c-5p   | MIMAT0004657 | CGUCUUACCCAGCAGUGUUUGG    | 10.82948374  |
| plate 08 | B06 | hsa-miR-1207-5p   | MIMAT0005871 | UGGCAGGGAGGCUGGGAGGGG     | 9.452323957  |
| plate 08 | B07 | hsa-miR-200a-5p   | MIMAT0001620 | CAUCUUACCGGACAGUGCUGGA    | -3.075656846 |
| plate 08 | B08 | hsa-miR-124-5p    | MIMAT0004591 | CGUGUUCACAGCGGACCUUGAU    | 8.039691878  |
| plate 08 | B09 | hsa-let-7e-3p     | MIMAT0004485 | CUAUACGGCCUCCUAGCUUUC     | 23.36789757  |
| plate 08 | B10 | hsa-miR-1179      | MIMAT0005824 | AAGCAUUCUUUCAUUGGUUGG     | 15.19674953  |
| plate 08 | B11 | hsa-miR-524-3p    | MIMAT0002850 | GAAGGCGCUUCCCUUGGAGU      | 25.10186693  |
| plate 08 | B12 |                   |              |                           |              |
| plate 08 | C01 |                   |              |                           |              |
| plate 08 | C02 | hsa-miR-516b-5p   | MIMAT0002859 | AUCUGGAGGUAAGAAGCACUUU    | 1.15806618   |
| plate 08 | C03 | hsa-miR-1202      | MIMAT0005865 | GUGCCAGCUGCAGUGGGGGAG     | -42.95277895 |
| plate 08 | C04 | hsa-miR-10b-3p    | MIMAT0004556 | ACAGAUUCGAUUCUAGGGGAU     | 8.296344383  |
| plate 08 | C05 | hsa-miR-636       | MIMAT0003306 | UGUGCUUGCUCGUCCCGCCGCA    | -59.98991474 |
| plate 08 | C06 | hsa-miR-92a-2-5p  | MIMAT0004508 | GGGUGGGGAUUUGUUGCAUUC     | 11.27810397  |
| plate 08 | C07 | hsa-miR-26a-2-3p  | MIMAT0004681 | CCUAUUCUUGAUUACUUGUUUC    | 24.53848339  |
| plate 08 | C08 | hsa-miR-147a      | MIMAT0000251 | GUGUGUGGAAUUGCUUCUGC      | 15.86029015  |
| plate 08 | C09 | hsa-miR-182-3p    | MIMAT0000260 | UGGUUCUAGACUUGCCAACUA     | 15.28438697  |
| plate 08 | C10 | hsa-miR-196b-5p   | MIMAT0001080 | UAGGUAGUUCCUGUUGUUGGG     | 16.26091845  |
| plate 08 | C11 | hsa-miR-1231      | MIMAT0005586 | GUGUCUGGGCGGACAGCUGC      | 40.78270899  |
| plate 08 | C12 |                   |              |                           |              |
| plate 08 | D01 |                   |              |                           |              |
| plate 08 | D02 | hsa-miR-424-3p    | MIMAT0004749 | CAAACGUGAGGCGCUGCUAU      | 3.789276006  |
| plate 08 | D03 | hsa-miR-145-3p    | MIMAT0004601 | GGAUUCCUGGAAUACUGUUCU     | 33.68198969  |
| plate 08 | D04 | hsa-miR-548c-3p   | MIMAT0003285 | CAAAAUCUCAAUUACUUUUGC     | 24.51135751  |
| plate 08 | D05 | hsa-miR-520e      | MIMAT0002825 | AAAGUGCUUCCUUUUUGAGGG     | 28.04189441  |
| plate 08 | D06 | hsa-miR-602       | MIMAT0003270 | GACACGGGCGACAGCUGCGGCC    | 2.731366901  |
| plate 08 | D07 | hsa-miR-15b-3p    | MIMAT0004586 | CGAAUCAUUUUUGCUGCUCUA     | 23.52230639  |
| plate 08 | D08 | hsa-miR-30b-3p    | MIMAT0004589 | CUGGGAGGUGGAUGUUUACUUC    | -63.0363591  |
| plate 08 | D09 | hsa-miR-141-5p    | MIMAT0004598 | CAUCUCCAGUACAGUGUUGGA     | 17.24370975  |
| plate 08 | D10 | hsa-miR-1323      | MIMAT0005795 | UCAAACUGAGGGGCAUUUUCU     | 15.87072318  |
| plate 08 | D11 | hsa-miR-490-5p    | MIMAT0004764 | CCAUGGAUCUCCAGGUGGGU      | 18.67094807  |
| plate 08 | D12 |                   |              |                           |              |
| plate 08 | E01 |                   |              |                           |              |
| plate 08 | E02 | hsa-miR-19b-1-5p  | MIMAT0004491 | AGUUUUGCAGGUUUGCAUCCAGC   | -23.01734781 |
| plate 08 | E03 | hsa-miR-518e-3p   | MIMAT0002861 | AAAGCGCUUCCCUUCAGAGUG     | 18.72102661  |
| plate 08 | E04 | hsa-miR-384       | MIMAT0001075 | AUUCUAGAAAUGUUCUAUA       | 67.12819294  |
| plate 08 | E05 | hsa-miR-595       | MIMAT0003263 | GAAGUGUGCCGUGGUGUGUCU     | 23.58490457  |
| plate 08 | E06 | hsa-miR-515-3p    | MIMAT0002827 | GAGUGCCUUCUUUGGAGCGUU     | 27.6016206   |
| plate 08 | E07 | hsa-miR-1270      | MIMAT0005924 | CUGGAGAUUUGGAAGAGCUGUGU   | 0.091810652  |
| plate 08 | E08 | hsa-miR-515-5p    | MIMAT0002826 | UUCUCAAAGAAAGCACUUUCUG    | 15.77682592  |
| plate 08 | E09 | hsa-miR-219a-2-3p | MIMAT0004675 | AGAAUUGUGGCUGGACAUCUGU    | 7.91658214   |
| plate 08 | E10 | hsa-miR-150-3p    | MIMAT0004610 | CUGGUACAGGCCUGGGGACAG     | 1.973929021  |
| plate 08 | E11 | hsa-miR-520a-5p   | MIMAT0002833 | CUCCAGAGGGAAGUACUUUCU     | 12.35479253  |
| plate 08 | E12 |                   |              |                           |              |

|          |     |                 |              |                         |              |
|----------|-----|-----------------|--------------|-------------------------|--------------|
| plate 08 | F01 |                 |              |                         |              |
| plate 08 | F02 | hsa-miR-300     | MIMAT0004903 | UAUACAAGGGCAGACUCUCUCU  | -57.97008039 |
| plate 08 | F03 | hsa-miR-657     | MIMAT0003335 | GGCAGGUUCUCACCCUCUCUAGG | -71.90860667 |
| plate 08 | F04 | hsa-miR-96-3p   | MIMAT0004510 | AAUCAUGUGCAGUGCCAAUAUG  | -59.85428537 |
| plate 08 | F05 | hsa-miR-1303    | MIMAT0005891 | UUUAGAGACGGGGUCUUGCUCU  | -16.62816106 |
| plate 08 | F06 | hsa-miR-585-3p  | MIMAT0003250 | UGGGCGUAUCUGUAUGCUA     | 25.12899281  |
| plate 08 | F07 | hsa-miR-552-3p  | MIMAT0003215 | AACAGGUGACUGGUUAGACAA   | 21.76538437  |
| plate 08 | F08 | hsa-miR-148b-5p | MIMAT0004699 | AAGUUCUGUUUAUACACUCAGGC | 21.10601696  |
| plate 08 | F09 | hsa-miR-99a-3p  | MIMAT0004511 | CAAGCUCGCUUCUAUUGGGUCUG | 24.78887607  |
| plate 08 | F10 | hsa-miR-654-5p  | MIMAT0003330 | UGGUGGGCCGCAGAACAUUGUC  | 0.828382475  |
| plate 08 | F11 | hsa-miR-589-5p  | MIMAT0004799 | UGAGAACCACGUCUCUCUGAG   | -27.91669806 |
| plate 08 | F12 |                 |              |                         |              |
| plate 08 | G01 |                 |              |                         |              |
| plate 08 | G02 | hsa-miR-195-3p  | MIMAT0004615 | CCAUAUUGGUCUGUCUCUCC    | 6.992215801  |
| plate 08 | G03 | hsa-miR-338-5p  | MIMAT0004701 | AACAUAUCCUGGUCUGAGUG    | 9.302088345  |
| plate 08 | G04 | hsa-miR-222-5p  | MIMAT0004569 | CUCAGUAGCCAGUGUAGAUCU   | 21.7403451   |
| plate 08 | G05 | hsa-miR-545-3p  | MIMAT0003165 | UCAGCAAACAUUUUUGUGUGC   | 12.66569678  |
| plate 08 | G06 | hsa-miR-1908-5p | MIMAT0007881 | CGGCGGGGACGGCGAUUGGUC   | 18.87543543  |
| plate 08 | G07 | hsa-miR-205-3p  | MIMAT0009197 | GAUUUCAGUGGAGUGAAGUUC   | 26.78993097  |
| plate 08 | G08 | hsa-miR-618     | MIMAT0003287 | AAACUCUACUUGUCCUUCUGAGU | 16.5676495   |
| plate 08 | G09 | hsa-miR-646     | MIMAT0003316 | AAGCAGCUGCCUCUGAGGC     | -8.363115766 |
| plate 08 | G10 | hsa-miR-571     | MIMAT0003236 | UGAGUUGGCCAUCUGAGUGAG   | -7.413710159 |
| plate 08 | G11 | hsa-miR-508-3p  | MIMAT0002880 | UGAUUGUAGCCUUUUGGAGUAGA | 10.11169137  |
| plate 08 | G12 |                 |              |                         |              |
| plate 08 | H01 |                 |              |                         |              |
| plate 08 | H02 |                 |              |                         |              |
| plate 08 | H03 |                 |              |                         |              |
| plate 08 | H04 |                 |              |                         |              |
| plate 08 | H05 |                 |              |                         |              |
| plate 08 | H06 |                 |              |                         |              |
| plate 08 | H07 |                 |              |                         |              |
| plate 08 | H08 |                 |              |                         |              |
| plate 08 | H09 |                 |              |                         |              |
| plate 08 | H10 |                 |              |                         |              |
| plate 08 | H11 |                 |              |                         |              |
| plate 08 | H12 |                 |              |                         |              |
| plate 09 | A01 |                 |              |                         |              |
| plate 09 | A02 |                 |              |                         |              |
| plate 09 | A03 |                 |              |                         |              |
| plate 09 | A04 |                 |              |                         |              |
| plate 09 | A05 |                 |              |                         |              |
| plate 09 | A06 |                 |              |                         |              |
| plate 09 | A07 |                 |              |                         |              |
| plate 09 | A08 |                 |              |                         |              |
| plate 09 | A09 |                 |              |                         |              |
| plate 09 | A10 |                 |              |                         |              |
| plate 09 | A11 |                 |              |                         |              |
| plate 09 | A12 |                 |              |                         |              |
| plate 09 | B01 |                 |              |                         |              |

|          |     |                   |              |                          |              |
|----------|-----|-------------------|--------------|--------------------------|--------------|
| plate 09 | B02 |                   |              |                          |              |
| plate 09 | B03 |                   |              |                          |              |
| plate 09 | B04 | hsa-miR-298       | MIMAT0004901 | AGCAGAAGCAGGGAGGUUCUCCCA | -18.12011089 |
| plate 09 | B05 | hsa-miR-502-5p    | MIMAT0002873 | AUCCUUGCUAUCUGGGUGCUA    | 22.51000843  |
| plate 09 | B06 | hsa-miR-132-5p    | MIMAT0004594 | ACCGUGGCUUUCGAUUGUUACU   | 21.74447234  |
| plate 09 | B07 | hsa-miR-325       | MIMAT0000771 | CCUAGUAGGUGUCCAGUAAGUGU  | -10.2750017  |
| plate 09 | B08 | hsa-miR-181c-3p   | MIMAT0004559 | AACCAUCGACCGUUGAGUGGAC   | 25.82296948  |
| plate 09 | B09 | hsa-miR-374a-3p   | MIMAT0004688 | CUUAUCAGAUUGUAUUGUAAUU   | 21.30172639  |
| plate 09 | B10 | hsa-miR-493-5p    | MIMAT0002813 | UUGUACAUGGUAGGCUUUCAUU   | 24.01272743  |
| plate 09 | B11 | hsa-miR-32-3p     | MIMAT0004505 | CAUUUUAGUGUGUGUGAUUUU    | 17.35627114  |
| plate 09 | B12 |                   |              |                          |              |
| plate 09 | C01 |                   |              |                          |              |
| plate 09 | C02 | hsa-miR-135b-3p   | MIMAT0004698 | AUGUAGGGCUAAAAGCCAUGGG   | -11.51817997 |
| plate 09 | C03 | hsa-miR-548d-5p   | MIMAT0004812 | AAAAGUAAUUGUGUUUUUGCC    | 22.53399959  |
| plate 09 | C04 | hsa-miR-548d-5p   | MIMAT0004812 | AAAAGUAAUUGUGUUUUUGCC    | 28.73462385  |
| plate 09 | C05 | hsa-miR-188-3p    | MIMAT0004613 | CUCCACAUGCAGGGUUUGCA     | 34.56229462  |
| plate 09 | C06 | hsa-miR-185-3p    | MIMAT0004611 | AGGGGCGUGCUUCCUCUGGUC    | -67.2692729  |
| plate 09 | C07 | hsa-miR-1256      | MIMAT0005907 | AGGCAUUGACUUCUCACUAGCU   | 36.02357434  |
| plate 09 | C08 | hsa-miR-521       | MIMAT0002854 | AACGCACUCCCUUAGAGUGU     | -11.45929258 |
| plate 09 | C09 | hsa-miR-1973      | MIMAT0009448 | ACCGUGCAAAGGUAGCAUA      | -31.9782771  |
| plate 09 | C10 | hsa-miR-373-5p    | MIMAT0000725 | ACUCAAAAUGGGGCGCUUCC     | -7.068910365 |
| plate 09 | C11 | hsa-miR-580-3p    | MIMAT0003245 | UUGAGAAUGAUGAAUCAUUAGG   | 33.116282    |
| plate 09 | C12 |                   |              |                          |              |
| plate 09 | D01 |                   |              |                          |              |
| plate 09 | D02 | hsa-miR-639       | MIMAT0003309 | AUCGCUGCGGUUGCGAGCGUGU   | 29.93636284  |
| plate 09 | D03 | hsa-miR-183-3p    | MIMAT0004560 | GUGAAUUACCGAAGGGCCAUA    | -84.69557884 |
| plate 09 | D04 | hsa-miR-376a-5p   | MIMAT0003386 | GUAGAUUCUCCUUCUAUGAGUA   | 24.82188381  |
| plate 09 | D05 | hsa-miR-663b      | MIMAT0005867 | GGUGGCCCGCCGUGCCUGAGG    | -35.80595756 |
| plate 09 | D06 | hsa-miR-543       | MIMAT0004954 | AAACAUUCGCGGUGCACUUCUU   | 38.17405465  |
| plate 09 | D07 | hsa-miR-154-3p    | MIMAT0000453 | AAUCAUACACGGUUGACCUAUU   | 39.58735205  |
| plate 09 | D08 | hsa-miR-1227-3p   | MIMAT0005580 | CGUGCCACCCUUUUCCCAG      | 7.480637438  |
| plate 09 | D09 | hsa-miR-632       | MIMAT0003302 | GUGUCUGCUUCCUGUGGGA      | 23.74446265  |
| plate 09 | D10 | hsa-miR-29a-5p    | MIMAT0004503 | ACUGAUUUUCUUUUGGUGUUCAG  | 29.14683559  |
| plate 09 | D11 | hsa-miR-93-3p     | MIMAT0004509 | ACUGCUGAGCUAGCACUCCCCG   | -16.55196146 |
| plate 09 | D12 |                   |              |                          |              |
| plate 09 | E01 |                   |              |                          |              |
| plate 09 | E02 | hsa-miR-1258      | MIMAT0005909 | AGUUAGGAUUAGGUCGUGGAA    | 16.75213012  |
| plate 09 | E03 | hsa-let-7d-3p     | MIMAT0004484 | CUAUACGACCUGCUGCCUUUCU   | 36.28093406  |
| plate 09 | E04 | hsa-miR-196a-3p   | MIMAT0004562 | CGGCAACAAGAAACUGCCUGAG   | 3.201486967  |
| plate 09 | E05 | hsa-miR-27a-5p    | MIMAT0004501 | AGGGCUUAGCUGCUUGUGAGCA   | 20.18504696  |
| plate 09 | E06 | hsa-miR-125b-2-3p | MIMAT0004603 | UCACAAGUCAGGCUCUUGGGAC   | -17.36329886 |
| plate 09 | E07 | hsa-miR-219a-1-3p | MIMAT0004567 | AGAGUUGAGUCUGGACGUCCCG   | 39.79454843  |
| plate 09 | E08 | hsa-miR-143-5p    | MIMAT0004599 | GGUGCAGUGCUGCAUCUCUGGU   | -79.37826546 |
| plate 09 | E09 | hsa-miR-1283      | MIMAT0005799 | UCUACAAAGGAAAGCGCUUUCU   | 14.49696112  |
| plate 09 | E10 | hsa-miR-23a-5p    | MIMAT0004496 | GGGGUCCUGGGGAUGGGAUUU    | 15.56347722  |
| plate 09 | E11 | hsa-miR-522-3p    | MIMAT0002868 | AAAAGGUUCCCUUAGAGUGU     | 19.2581158   |
| plate 09 | E12 |                   |              |                          |              |
| plate 09 | F01 |                   |              |                          |              |
| plate 09 | F02 | hsa-miR-1282      | MIMAT0005940 | UCGUUUGCCUUUUUCUGCUU     | 19.03129029  |

|          |     |                  |              |                        |              |
|----------|-----|------------------|--------------|------------------------|--------------|
| plate 09 | F03 | hsa-miR-525-3p   | MIMAT0002839 | GAAGGCGCUUCCCUUAGAGCG  | 33.51104563  |
| plate 09 | F04 | hsa-miR-576-5p   | MIMAT0003241 | AUUCUAAUUUCUCCACGUCUUU | 34.23514244  |
| plate 09 | F05 | hsa-miR-517-5p   | MIMAT0002851 | CCUCUAGAUGGAAGCACUGUCU | -11.08415808 |
| plate 09 | F06 | hsa-miR-579-3p   | MIMAT0003244 | UUCAUUUGUAUAAACCGCAUU  | 34.47287303  |
| plate 09 | F07 | hsa-miR-129-1-3p | MIMAT0004548 | AAGCCCUUACCCCAAAAAGUAU | 36.62553435  |
| plate 09 | F08 | hsa-miR-1299     | MIMAT0005887 | UUCUGGAAUUCUGUGUGAGGGA | 23.06834815  |
| plate 09 | F09 | hsa-miR-99b-3p   | MIMAT0004678 | CAAGCUCGUGUCUGUGGGUCCG | 29.93854386  |
| plate 09 | F10 | hsa-miR-302b-5p  | MIMAT0000714 | ACUUUAACAUGGAAGUGCUUUC | -11.67521301 |
| plate 09 | F11 | hsa-miR-601      | MIMAT0003269 | UGGUCUAGGAUUGUUGGAGGAG | 20.80445509  |
| plate 09 | F12 |                  |              |                        |              |
| plate 09 | G01 |                  |              |                        |              |
| plate 09 | G02 | hsa-miR-566      | MIMAT0003230 | GGGCGCCUGUGAUCCCAAC    | 13.52859068  |
| plate 09 | G03 | hsa-miR-643      | MIMAT0003313 | ACUUGUAUGCUAGCUCAGGUAG | -9.18885647  |
| plate 09 | G04 | hsa-miR-371a-3p  | MIMAT0000723 | AAGUGCCGCAUCUUUUGAGUGU | 19.86443783  |
| plate 09 | G05 | hsa-miR-302f     | MIMAT0005932 | UAAUUGCUUCCAUGUUU      | 26.44455861  |
| plate 09 | G06 | hsa-miR-624-5p   | MIMAT0003293 | UAGUACCAGUACCUUGUGUUCA | -54.67827613 |
| plate 09 | G07 | hsa-miR-628-5p   | MIMAT0004809 | AUGCUGACAUUUUACUAGAGG  | 11.90155385  |
| plate 09 | G08 | hsa-miR-634      | MIMAT0003304 | AACCAGCACCCCAACUUUGGAC | -40.6063705  |
| plate 09 | G09 | hsa-miR-454-5p   | MIMAT0003884 | ACCCUAUCAUAUUGUCUCUGC  | -6.414606012 |
| plate 09 | G10 | hsa-miR-1297     | MIMAT0005886 | UUCAAGUAAUUCAGGUG      | 19.09890174  |
| plate 09 | G11 | hsa-miR-448      | MIMAT0001532 | UUGCAUAUGUAGGAUGUCCCAU | 0.53410622   |
| plate 09 | G12 |                  |              |                        |              |
| plate 09 | H01 |                  |              |                        |              |
| plate 09 | H02 |                  |              |                        |              |
| plate 09 | H03 |                  |              |                        |              |
| plate 09 | H04 |                  |              |                        |              |
| plate 09 | H05 |                  |              |                        |              |
| plate 09 | H06 |                  |              |                        |              |
| plate 09 | H07 |                  |              |                        |              |
| plate 09 | H08 |                  |              |                        |              |
| plate 09 | H09 |                  |              |                        |              |
| plate 09 | H10 |                  |              |                        |              |
| plate 09 | H11 |                  |              |                        |              |
| plate 09 | H12 |                  |              |                        |              |
| plate 10 | A01 |                  |              |                        |              |
| plate 10 | A02 |                  |              |                        |              |
| plate 10 | A03 |                  |              |                        |              |
| plate 10 | A04 |                  |              |                        |              |
| plate 10 | A05 |                  |              |                        |              |
| plate 10 | A06 |                  |              |                        |              |
| plate 10 | A07 |                  |              |                        |              |
| plate 10 | A08 |                  |              |                        |              |
| plate 10 | A09 |                  |              |                        |              |
| plate 10 | A10 |                  |              |                        |              |
| plate 10 | A11 |                  |              |                        |              |
| plate 10 | A12 |                  |              |                        |              |
| plate 10 | B01 |                  |              |                        |              |
| plate 10 | B02 |                  |              |                        |              |
| plate 10 | B03 |                  |              |                        |              |

|          |     |                  |              |                             |              |
|----------|-----|------------------|--------------|-----------------------------|--------------|
| plate 10 | B04 | hsa-miR-519c-3p  | MIMAT0002832 | AAAGUGCAUCUUUUUAGAGGAU      | -11.82140238 |
| plate 10 | B05 | hsa-miR-452-3p   | MIMAT0001636 | CUCAUCUGCAAAGAAGUAAGUG      | 3.258959092  |
| plate 10 | B06 | hsa-miR-655-3p   | MIMAT0003331 | AUAAUACAUGGUUAACCUCUUU      | -13.34510062 |
| plate 10 | B07 | hsa-miR-1183     | MIMAT0005828 | CACUGUAGGUGAUGGUGAGAGUGGGCA | 18.45119268  |
| plate 10 | B08 | hsa-miR-1233-3p  | MIMAT0005588 | UGAGCCCUGUCCUCCCGCAG        | -26.36477769 |
| plate 10 | B09 | hsa-miR-641      | MIMAT0003311 | AAAGACAUAGGAUAGAGUCACCUC    | 20.12479956  |
| plate 10 | B10 | hsa-miR-1204     | MIMAT0005868 | UCGUGGCCUGGUCUCCAUAU        | -31.63619187 |
| plate 10 | B11 | hsa-miR-1468-5p  | MIMAT0006789 | CUCCGUUUGCCUGUUUCGCGUG      | -2.533779164 |
| plate 10 | B12 |                  |              |                             |              |
| plate 10 | C01 |                  |              |                             |              |
| plate 10 | C02 | hsa-miR-647      | MIMAT0003317 | GUGGCUGCACUCACUUCUUC        | -55.49851459 |
| plate 10 | C03 | hsa-miR-200b-5p  | MIMAT0004571 | CAUCUUACUGGGCAGCAUUGGA      | -5.878755485 |
| plate 10 | C04 | hsa-miR-302c-5p  | MIMAT0000716 | UUUAACAUGGGGGUACCUGCUG      | -68.22284926 |
| plate 10 | C05 | hsa-miR-1185-5p  | MIMAT0005798 | AGAGGAUACCCUUUGUAUGUU       | 15.90945817  |
| plate 10 | C06 | hsa-miR-944      | MIMAT0004987 | AAAUUAUUGUACAUCGGAUGAG      | -13.01172171 |
| plate 10 | C07 | hsa-miR-659-3p   | MIMAT0003337 | CUUGGUUCAGGGAGGGUCCCA       | -11.88181332 |
| plate 10 | C08 | hsa-miR-520f-3p  | MIMAT0002830 | AAGUGCUUCUUUUAGAGGGUU       | 7.541423759  |
| plate 10 | C09 | hsa-miR-1225-3p  | MIMAT0005573 | UGAGCCCCUGUGCCGCCCCAG       | -53.75778443 |
| plate 10 | C10 | hsa-miR-524-5p   | MIMAT0002849 | CUACAAAGGGAAGCACUUUCUC      | -35.99472958 |
| plate 10 | C11 | hsa-miR-518a-3p  | MIMAT0002863 | GAAAGCGCUUCCUUUGCUGGA       | -1.547067086 |
| plate 10 | C12 |                  |              |                             |              |
| plate 10 | D01 |                  |              |                             |              |
| plate 10 | D02 | hsa-miR-1286     | MIMAT0005877 | UGCAGGACCAAGAUGAGCCCU       | -42.15664583 |
| plate 10 | D03 | hsa-miR-3065-3p  | MIMAT0015378 | UCAGCACCAGGAUAUUGUUGGAG     | -77.6491939  |
| plate 10 | D04 | hsa-miR-1915-3p  | MIMAT0007892 | CCCCAGGGCGACGCGGCGGG        | -3.050628348 |
| plate 10 | D05 | hsa-miR-92b-5p   | MIMAT0004792 | AGGGACGGGACGCGGUGCAGUG      | 13.73913908  |
| plate 10 | D06 | hsa-miR-19b-2-5p | MIMAT0004492 | AGUUUUGCAGGUUUGCAUUUCA      | -13.93131052 |
| plate 10 | D07 | hsa-miR-380-3p   | MIMAT0000735 | UAUGUAAUAUGGUCCACAUCUU      | 24.84132805  |
| plate 10 | D08 | hsa-miR-569      | MIMAT0003234 | AGUUAAUGAAUCCUGGAAAGU       | 1.840420639  |
| plate 10 | D09 | hsa-miR-20b-3p   | MIMAT0004752 | ACUGUAGUAUGGGCACUCCAG       | -59.44088802 |
| plate 10 | D10 | hsa-miR-488-5p   | MIMAT0002804 | CCCAGUAAUGGCACUCUCAA        | -2.10195279  |
| plate 10 | D11 | hsa-miR-2110     | MIMAT0010133 | UUGGGAAACGGCCGCUGAGUG       | -3.104326965 |
| plate 10 | D12 |                  |              |                             |              |
| plate 10 | E01 |                  |              |                             |              |
| plate 10 | E02 | hsa-miR-487a-3p  | MIMAT0002178 | AAUCAUACAGGGACAUCAGUU       | 14.00763216  |
| plate 10 | E03 | hsa-miR-1293     | MIMAT0005883 | UGGGUGGUCUGGAGAUUUGUC       | 30.94059591  |
| plate 10 | E04 | hsa-miR-614      | MIMAT0003282 | GAACGCCUGUUCUUGCCAGGUGG     | -36.81587092 |
| plate 10 | E05 | hsa-miR-628-3p   | MIMAT0003297 | UCUAGUAAGAGUGGCAGUCGA       | 29.53548211  |
| plate 10 | E06 | hsa-miR-508-5p   | MIMAT0004778 | UACUCCAGAGGGCGUCACUCAUG     | -13.41222389 |
| plate 10 | E07 | hsa-miR-513b-5p  | MIMAT0005788 | UUCACAAGGAGGUGUCAUUUAU      | -5.281358376 |
| plate 10 | E08 | hsa-miR-412-3p   | MIMAT0002170 | ACUUCACCGUCCACUAGCCGU       | -47.45714676 |
| plate 10 | E09 | hsa-miR-938      | MIMAT0004981 | UGCCUUAAAGGUGAACCCAGU       | 18.18046216  |
| plate 10 | E10 | hsa-miR-501-3p   | MIMAT0004774 | AAUGCACCCGGGAAGGAUUCU       | -67.40394536 |
| plate 10 | E11 | hsa-miR-548b-3p  | MIMAT0003254 | CAAGAACCUCAGUUGCUUUUGU      | 20.47160313  |
| plate 10 | E12 |                  |              |                             |              |
| plate 10 | F01 |                  |              |                             |              |
| plate 10 | F02 | hsa-miR-514a-3p  | MIMAT0002883 | AUUGACACUUCUGUGAGUAGA       | 22.99096322  |
| plate 10 | F03 | hsa-miR-101-5p   | MIMAT0004513 | CAGUUAUCACAGUGCUGAUGCU      | 32.10854081  |
| plate 10 | F04 | hsa-miR-365a-5p  | MIMAT0009199 | AGGGACUUUUGGGGGCAGAUGUG     | 16.42183247  |

|          |     |                  |              |                            |              |
|----------|-----|------------------|--------------|----------------------------|--------------|
| plate 10 | F05 | hsa-miR-1247-5p  | MIMAT0005899 | ACCCGUCCCCGUUCGUCCCCGGA    | 3.225397457  |
| plate 10 | F06 | hsa-miR-1226-3p  | MIMAT0005577 | UCACCAGCCCUGUGUCCCUAG      | -47.12824274 |
| plate 10 | F07 | hsa-miR-633      | MIMAT0003303 | CUAAUAGUAUCUACCACAAUAAA    | -2.641176397 |
| plate 10 | F08 | hsa-miR-575      | MIMAT0003240 | GAGCCAGUUGGACAGGAGC        | 17.76429788  |
| plate 10 | F09 | hsa-miR-890      | MIMAT0004912 | UACUUGGAAAGGCAUCAGUUG      | 20.93251625  |
| plate 10 | F10 | hsa-miR-1471     | MIMAT0007349 | GCCCGUGUGGAGCCAGGUGU       | 15.22927569  |
| plate 10 | F11 | hsa-miR-526b-5p  | MIMAT0002835 | CUCUUGAGGGAAGCACUUUCUGU    | -67.07727877 |
| plate 10 | F12 |                  |              |                            |              |
| plate 10 | G01 |                  |              |                            |              |
| plate 10 | G02 | hsa-miR-1255b-5p | MIMAT0005945 | CGGAUGAGCAAAGAAAGUGGUU     | 17.62110157  |
| plate 10 | G03 | hsa-miR-3196     | MIMAT0015080 | CGGGGCGGCAGGGGCCUC         | 26.13456973  |
| plate 10 | G04 | hsa-miR-452-5p   | MIMAT0001635 | AACUGUUUGCAGAGGAAACUGA     | 34.43548086  |
| plate 10 | G05 | hsa-miR-1226-5p  | MIMAT0005576 | GUGAGGGCAUGCAGGCCUGGAUGGGG | 9.812427749  |
| plate 10 | G06 | hsa-miR-548d-3p  | MIMAT0003323 | CAAAAACCACAGUUUCUUUUGC     | 44.42118609  |
| plate 10 | G07 | hsa-miR-1284     | MIMAT0005941 | UCUAUACAGACCCUGGCUUUUC     | -50.37477159 |
| plate 10 | G08 | hsa-miR-520d-3p  | MIMAT0002856 | AAAGUGCUUCUCUUUGGUGGGU     | 38.44274012  |
| plate 10 | G09 | hsa-miR-1184     | MIMAT0005829 | CCUGCAGCGACUUGAUGGCUUCC    | -74.77408047 |
| plate 10 | G10 | hsa-miR-613      | MIMAT0003281 | AGGAAUGUCCUUCUUUGCC        | 24.3423784   |
| plate 10 | G11 | hsa-miR-198      | MIMAT0000228 | GGUCCAGAGGGGAGAUAGGUUC     | 10.49708511  |
| plate 10 | G12 |                  |              |                            |              |
| plate 10 | H01 |                  |              |                            |              |
| plate 10 | H02 |                  |              |                            |              |
| plate 10 | H03 |                  |              |                            |              |
| plate 10 | H04 |                  |              |                            |              |
| plate 10 | H05 |                  |              |                            |              |
| plate 10 | H06 |                  |              |                            |              |
| plate 10 | H07 |                  |              |                            |              |
| plate 10 | H08 |                  |              |                            |              |
| plate 10 | H09 |                  |              |                            |              |
| plate 10 | H10 |                  |              |                            |              |
| plate 10 | H11 |                  |              |                            |              |
| plate 10 | H12 |                  |              |                            |              |
| plate 11 | A01 |                  |              |                            |              |
| plate 11 | A02 |                  |              |                            |              |
| plate 11 | A03 |                  |              |                            |              |
| plate 11 | A04 |                  |              |                            |              |
| plate 11 | A05 |                  |              |                            |              |
| plate 11 | A06 |                  |              |                            |              |
| plate 11 | A07 |                  |              |                            |              |
| plate 11 | A08 |                  |              |                            |              |
| plate 11 | A09 |                  |              |                            |              |
| plate 11 | A10 |                  |              |                            |              |
| plate 11 | A11 |                  |              |                            |              |
| plate 11 | A12 |                  |              |                            |              |
| plate 11 | B01 |                  |              |                            |              |
| plate 11 | B02 |                  |              |                            |              |
| plate 11 | B03 |                  |              |                            |              |
| plate 11 | B04 | hsa-miR-933      | MIMAT0004976 | UGUGCGCAGGGAGACCUCUCCC     | 9.231561253  |
| plate 11 | B05 | hsa-miR-431-3p   | MIMAT0004757 | CAGGUCGUCUUGCAGGGCUUCU     | 21.71150979  |

|          |     |                   |              |                          |              |
|----------|-----|-------------------|--------------|--------------------------|--------------|
| plate 11 | B06 | hsa-miR-138-1-3p  | MIMAT0004607 | GCUACUUCACAACACCAGGGCC   | -47.98140195 |
| plate 11 | B07 | hsa-miR-617       | MIMAT0003286 | AGACUCCCAUUAUGAAGGUGGC   | 33.32851222  |
| plate 11 | B08 | hsa-miR-523-3p    | MIMAT0002840 | GAACGCGCUUCCCUAUAGAGGGU  | -34.73681762 |
| plate 11 | B09 | hsa-miR-1273c     | MIMAT0015017 | GGCGACAAAACGAGACCCUGUC   | -83.26206173 |
| plate 11 | B10 | hsa-miR-146a-3p   | MIMAT0004608 | CCUCUGAAAUUCAGUUCUUCAG   | 3.260119793  |
| plate 11 | B11 | hsa-miR-548p      | MIMAT0005934 | UAGCAAAAACUGCAGUUACUUU   | 6.589926631  |
| plate 11 | B12 |                   |              |                          |              |
| plate 11 | C01 |                   |              |                          |              |
| plate 11 | C02 | hsa-miR-125b-1-3p | MIMAT0004592 | ACGGGUUAGGCUCUUGGGAGCU   | -3.645269676 |
| plate 11 | C03 | hsa-let-7a-3p     | MIMAT0004481 | CUAUACAAUCUACUGUCUUUC    | -31.33965001 |
| plate 11 | C04 | hsa-miR-891a-5p   | MIMAT0004902 | UGCAACGAACCUGAGCCACUGA   | -60.46499162 |
| plate 11 | C05 | hsa-miR-644a      | MIMAT0003314 | AGUGUGGCUUUCUAGAGC       | 21.7442799   |
| plate 11 | C06 | hsa-miR-186-3p    | MIMAT0004612 | GCCCAAAGGUGAAUUUUUUGGG   | 15.71640103  |
| plate 11 | C07 | hsa-miR-611       | MIMAT0003279 | GCGAGGACCCUCGGGGUCUGAC   | 17.90653642  |
| plate 11 | C08 | hsa-miR-3179      | MIMAT0015056 | AGAAGGGGUGAAAUUUAAACGU   | 19.153621    |
| plate 11 | C09 | hsa-miR-4286      | MIMAT0016916 | ACCCACUCCUGGUACC         | -48.68049754 |
| plate 11 | C10 | hsa-miR-4324      | MIMAT0016876 | CCUGAGACCCUACCUUAA       | -58.10190289 |
| plate 11 | C11 | hsa-miR-877-5p    | MIMAT0004949 | GUAGAGGAGAUGGCGCAGGG     | -17.49063928 |
| plate 11 | C12 |                   |              |                          |              |
| plate 11 | D01 |                   |              |                          |              |
| plate 11 | D02 | hsa-miR-1249      | MIMAT0005901 | ACGCCUUCUUUUUUUCUUA      | -62.97008413 |
| plate 11 | D03 | hsa-miR-1245a     | MIMAT0005897 | AAGUGAUCUAAAGGCCUACAU    | 15.05917836  |
| plate 11 | D04 | hsa-miR-518f-5p   | MIMAT0002841 | CUCUAGAGGGGAAGCACUUUCUC  | -31.06292467 |
| plate 11 | D05 | hsa-miR-1206      | MIMAT0005870 | UGUUAUGUAGAUGUUUAAGC     | 16.4118555   |
| plate 11 | D06 | hsa-miR-558       | MIMAT0003222 | UGAGCUGCUGUACCAAAAU      | 10.02350547  |
| plate 11 | D07 | hsa-miR-640       | MIMAT0003310 | AUGAUCCAGGAACCUGCCUCU    | 36.17404972  |
| plate 11 | D08 | hsa-miR-1254      | MIMAT0005905 | AGCCUGGAAGCUGGAGCCUGCAGU | -5.593270396 |
| plate 11 | D09 | hsa-miR-221-5p    | MIMAT0004568 | ACCUGGCAUACAAUGUAGAUUU   | 43.39803743  |
| plate 11 | D10 | hsa-miR-1225-5p   | MIMAT0005572 | GUGGGUACGGCCAGUGGGGGG    | 18.34711229  |
| plate 11 | D11 | hsa-miR-629-3p    | MIMAT0003298 | GUUCUCCCAACGUAGCCCAGC    | -16.15980888 |
| plate 11 | D12 |                   |              |                          |              |
| plate 11 | E01 |                   |              |                          |              |
| plate 11 | E02 | hsa-miR-3065-5p   | MIMAT0015066 | UCAACAAAUCACUGAUGCUGGA   | 26.61974338  |
| plate 11 | E03 | hsa-miR-466       | MIMAT0015002 | AUACACAUACACGCAACACACAU  | 5.084322336  |
| plate 11 | E04 | hsa-miR-3151-5p   | MIMAT0015024 | GGUGGGGCAAUGGGAUCAGGU    | 6.551694842  |
| plate 11 | E05 | hsa-miR-623       | MIMAT0003292 | AUCCUUGCAGGGGCUUUGGGU    | -9.334524115 |
| plate 11 | E06 | hsa-miR-4281      | MIMAT0016907 | GGGUCCCGGGGAGGGGGG       | 24.93572407  |
| plate 11 | E07 | hsa-miR-551a      | MIMAT0003214 | GCGACCCACUCUUGGUUCCA     | 23.59214974  |
| plate 11 | E08 | hsa-miR-708-3p    | MIMAT0004927 | CAACUAGACUGUGAGCUUCUAG   | 48.76869363  |
| plate 11 | E09 | hsa-miR-562       | MIMAT0003226 | AAAGUAGCUGUACCAUUUGC     | 28.40935526  |
| plate 11 | E10 | hsa-miR-147b      | MIMAT0004928 | GUGUGCGGAAUGCUUCUGCUA    | 7.041425864  |
| plate 11 | E11 | hsa-miR-1250-5p   | MIMAT0005902 | ACGGUGCUGGAUGUGGCCUUU    | -38.09211232 |
| plate 11 | E12 |                   |              |                          |              |
| plate 11 | F01 |                   |              |                          |              |
| plate 11 | F02 | hsa-miR-130b-5p   | MIMAT0004680 | ACUCUUUCCUGUUGCACUAC     | -28.16094977 |
| plate 11 | F03 | hsa-miR-15a-3p    | MIMAT0004488 | CAGGCCAUUAUUGUGCUGCCUCA  | -4.892354249 |
| plate 11 | F04 | hsa-miR-4291      | MIMAT0016922 | UUCAGCAGGAACAGCU         | 17.94840934  |
| plate 11 | F05 | hsa-miR-1301-3p   | MIMAT0005797 | UUGCAGCUGCCUGGGAGUGACUUC | 25.92428892  |
| plate 11 | F06 | hsa-miR-1537-3p   | MIMAT0007399 | AAAACCGUCUAGUUACAGUUGU   | 33.81824324  |

|          |     |                  |              |                           |              |
|----------|-----|------------------|--------------|---------------------------|--------------|
| plate 11 | F07 | hsa-miR-1269a    | MIMAT0005923 | CUGGACUGAGCCGUGCUACUGG    | -6.847637215 |
| plate 11 | F08 | hsa-miR-3202     | MIMAT0015089 | UGGAAGGGAGAAGAGCUUUAAU    | 68.76027859  |
| plate 11 | F09 | hsa-miR-593-5p   | MIMAT0003261 | AGGCACCAGCCAGGCAUUGCUCAGC | -88.05742051 |
| plate 11 | F10 | hsa-miR-1238-3p  | MIMAT0005593 | CUUCCUCGUCUGUCUGCCCC      | 11.64926682  |
| plate 11 | F11 | hsa-miR-541-3p   | MIMAT0004920 | UGGUGGGCACAGAAUCUGGACU    | -80.30182886 |
| plate 11 | F12 |                  |              |                           |              |
| plate 11 | G01 |                  |              |                           |              |
| plate 11 | G02 | hsa-miR-548j-5p  | MIMAT0005875 | AAAAGUAAUUGCGGUCUUUGGU    | 8.080966435  |
| plate 11 | G03 | hsa-miR-548n     | MIMAT0005916 | CAAAGUAAUUGUGGAUUUUGU     | 8.607108685  |
| plate 11 | G04 | hsa-miR-548j-5p  | MIMAT0005875 | AAAAGUAAUUGCGGUCUUUGGU    | 22.66548398  |
| plate 11 | G05 | hsa-miR-548i     | MIMAT0005935 | AAAAGUAAUUGCGGAUUUUGCC    | 14.23264348  |
| plate 11 | G06 | hsa-miR-892b     | MIMAT0004918 | CACUGGCUCUUUCUGGGUAGA     | 21.83166685  |
| plate 11 | G07 | hsa-miR-651-5p   | MIMAT0003321 | UUUAGGAUAAGCUUGACUUUUG    | 32.90432141  |
| plate 11 | G08 | hsa-miR-889-3p   | MIMAT0004921 | UUAAUAUCGGACAACCAUUGU     | 47.41601649  |
| plate 11 | G09 | hsa-miR-26a-1-3p | MIMAT0004499 | CCUAUUCUUGGUUACUUGCACG    | 28.36566178  |
| plate 11 | G10 | hsa-miR-1261     | MIMAT0005913 | AUGGAUAAGGCUUUGGCUU       | 28.42027863  |
| plate 11 | G11 | hsa-let-7f-2-3p  | MIMAT0004487 | CUAUACAGUCUACUGUCUUUCC    | 18.72578906  |
| plate 11 | G12 |                  |              |                           |              |
| plate 11 | H01 |                  |              |                           |              |
| plate 11 | H02 |                  |              |                           |              |
| plate 11 | H03 |                  |              |                           |              |
| plate 11 | H04 |                  |              |                           |              |
| plate 11 | H05 |                  |              |                           |              |
| plate 11 | H06 |                  |              |                           |              |
| plate 11 | H07 |                  |              |                           |              |
| plate 11 | H08 |                  |              |                           |              |
| plate 11 | H09 |                  |              |                           |              |
| plate 11 | H10 |                  |              |                           |              |
| plate 11 | H11 |                  |              |                           |              |
| plate 11 | H12 |                  |              |                           |              |
| plate 12 | A01 |                  |              |                           |              |
| plate 12 | A02 |                  |              |                           |              |
| plate 12 | A03 |                  |              |                           |              |
| plate 12 | A04 |                  |              |                           |              |
| plate 12 | A05 |                  |              |                           |              |
| plate 12 | A06 |                  |              |                           |              |
| plate 12 | A07 |                  |              |                           |              |
| plate 12 | A08 |                  |              |                           |              |
| plate 12 | A09 |                  |              |                           |              |
| plate 12 | A10 |                  |              |                           |              |
| plate 12 | A11 |                  |              |                           |              |
| plate 12 | A12 |                  |              |                           |              |
| plate 12 | B01 |                  |              |                           |              |
| plate 12 | B02 |                  |              |                           |              |
| plate 12 | B03 |                  |              |                           |              |
| plate 12 | B04 | hsa-miR-1260a    | MIMAT0005911 | AUCCCACCUCUGCCACCA        | -156.9897352 |
| plate 12 | B05 | hsa-miR-599      | MIMAT0003267 | GUUGUGUCAGUUUAUCAAAC      | 34.77241967  |
| plate 12 | B06 | hsa-miR-1302     | MIMAT0005890 | UUGGGACAUACUUAUGCUAAA     | -45.33876327 |
| plate 12 | B07 | hsa-miR-589-3p   | MIMAT0003256 | UCAGAACAAAUGCCGGUCCAGA    | 2.479370698  |

|          |     |                  |              |                        |              |
|----------|-----|------------------|--------------|------------------------|--------------|
| plate 12 | B08 | hsa-miR-1262     | MIMAT0005914 | AUGGGUGAAUUUGUAGAAGGAU | 12.0219855   |
| plate 12 | B09 | hsa-miR-3148     | MIMAT0015021 | UGGAAAAAACUGGUGUGUGCUU | 14.85463954  |
| plate 12 | B10 | hsa-miR-891b     | MIMAT0004913 | UGCAACUUACCUGAGUCAUUGA | -14.64936518 |
| plate 12 | B11 | hsa-miR-892a     | MIMAT0004907 | CACUGUGUCCUUUCUGCGUAG  | 17.68927585  |
| plate 12 | B12 |                  |              |                        |              |
| plate 12 | C01 |                  |              |                        |              |
| plate 12 | C02 | hsa-miR-525-5p   | MIMAT0002838 | CUCCAGAGGGAUGCACUUUCU  | -35.47105731 |
| plate 12 | C03 | hsa-miR-648      | MIMAT0003318 | AAGUGUGCAGGGCACUGGU    | 24.02458887  |
| plate 12 | C04 | hsa-miR-330-5p   | MIMAT0004693 | UCUCUGGGCCUGUGUCUUAGGC | 11.76032677  |
| plate 12 | C05 | hsa-miR-194-3p   | MIMAT0004671 | CCAGUGGGGCUGCUGUUAUCUG | 38.31472392  |
| plate 12 | C06 | hsa-miR-1237-3p  | MIMAT0005592 | UCCUUCUGCUCGGUCCCCAG   | 17.66152416  |
| plate 12 | C07 | hsa-miR-1827     | MIMAT0006767 | UGAGGCAGUAGAUUGAAU     | 0.808322862  |
| plate 12 | C08 | hsa-let-7a-2-3p  | MIMAT0010195 | CUGUACAGCCUCCUAGCUUUC  | -147.9010586 |
| plate 12 | C09 | hsa-miR-621      | MIMAT0003290 | GGCUAGCAACAGCGCUUACCU  | -103.8393133 |
| plate 12 | C10 | hsa-miR-548a-5p  | MIMAT0004803 | AAAAGUAAUUGCGAGUUUACC  | 13.85954344  |
| plate 12 | C11 | hsa-miR-668-3p   | MIMAT0003881 | UGUCACUCGGCUCGGCCACUAC | 9.863300931  |
| plate 12 | C12 |                  |              |                        |              |
| plate 12 | D01 |                  |              |                        |              |
| plate 12 | D02 | hsa-let-7f-1-3p  | MIMAT0004486 | CUAUACAAUCUAUUGCCUUC   | 29.54915627  |
| plate 12 | D03 | hsa-miR-24-2-5p  | MIMAT0004497 | UGCCUACUGAGCUGAAACACAG | 31.63846163  |
| plate 12 | D04 | hsa-miR-583      | MIMAT0003248 | CAAAGAGGAAGGUCCAUUAC   | 18.86079337  |
| plate 12 | D05 | hsa-miR-218-1-3p | MIMAT0004565 | AUGGUUCGUCAGCACCAUGG   | -106.9296616 |
| plate 12 | D06 | hsa-miR-19a-5p   | MIMAT0004490 | AGUUUUGCAUAGUUGCACUACA | 37.80726455  |
| plate 12 | D07 | hsa-miR-4317     | MIMAT0016872 | ACAUUGCCAGGGAGUUU      | 32.88332289  |
| plate 12 | D08 | hsa-miR-656-3p   | MIMAT0003332 | AAUUAUUAACAGUCAACCUCU  | 37.14915319  |
| plate 12 | D09 | hsa-miR-654-3p   | MIMAT0004814 | UAUGUCUGCUGACCAUCACCUU | 14.47602728  |
| plate 12 | D10 | hsa-miR-576-3p   | MIMAT0004796 | AAGAUGUGGAAAAAUUGGAAUC | 5.878951999  |
| plate 12 | D11 | hsa-miR-1268a    | MIMAT0005922 | CGGGCGUGGUGGUGGGGG     | 10.87029061  |
| plate 12 | D12 |                  |              |                        |              |
| plate 12 | E01 |                  |              |                        |              |
| plate 12 | E02 | hsa-miR-519b-3p  | MIMAT0002837 | AAAGUGCAUCCUUUAGAGGUU  | 36.50491766  |
| plate 12 | E03 | hsa-miR-27b-5p   | MIMAT0004588 | AGAGCUUAGCUGAUUGGUGAAC | 9.968360878  |
| plate 12 | E04 | hsa-miR-671-3p   | MIMAT0004819 | UCCGGUUCUCAGGGCUCCACC  | -84.7025449  |
| plate 12 | E05 | hsa-miR-586      | MIMAT0003252 | UAUGCAUUGUAUUUUUAGGUCC | 35.94591946  |
| plate 12 | E06 | hsa-miR-135a-3p  | MIMAT0004595 | UAUAGGGAUUGGAGCCGUGGCG | 35.67236714  |
| plate 12 | E07 | hsa-miR-1304-5p  | MIMAT0005892 | UUUGAGGCUACAGUGAGAUGUG | -17.64852933 |
| plate 12 | E08 | hsa-miR-500a-3p  | MIMAT0002871 | AUGCACUGGGCAAGGAUUCUG  | -6.700489949 |
| plate 12 | E09 | hsa-miR-624-3p   | MIMAT0004807 | CACAAGGUUAUUGGUUUUACCU | -68.52529533 |
| plate 12 | E10 | hsa-miR-520a-3p  | MIMAT0002834 | AAAGUGCUUCCUUUGGACUGU  | 2.005609805  |
| plate 12 | E11 | hsa-miR-1243     | MIMAT0005894 | AACUGGAUCAUUUAUAGGAGUG | 18.58129426  |
| plate 12 | E12 |                  |              |                        |              |
| plate 12 | F01 |                  |              |                        |              |
| plate 12 | F02 | hsa-miR-181b-3p  | MIMAT0022692 | CUCACUGAACAAUGAAUGCAA  | 23.99683719  |
| plate 12 | F03 | hsa-miR-509-3-5p | MIMAT0004975 | UACUGCAGACGUGGCAAUCAUG | 41.92838964  |
| plate 12 | F04 | hsa-miR-610      | MIMAT0003278 | UGAGCUAAAUGUGUGCUGGGA  | 17.50294311  |
| plate 12 | F05 | hsa-miR-520d-5p  | MIMAT0002855 | CUACAAAGGGAAGCCUUUC    | -39.12436829 |
| plate 12 | F06 | hsa-miR-507      | MIMAT0002879 | UUUUGCACCUUUUGGAGUGAA  | -2.418801546 |
| plate 12 | F07 | hsa-miR-616-5p   | MIMAT0003284 | ACUCAAACCCUUCAGUGACUU  | -9.521250412 |
| plate 12 | F08 | hsa-miR-888-3p   | MIMAT0004917 | GACUGACACCUCUUUGGUGAA  | 30.69688664  |

|          |     |                  |              |                         |              |
|----------|-----|------------------|--------------|-------------------------|--------------|
| plate 12 | F09 | hsa-miR-567      | MIMAT0003231 | AGUAUGUUCUCCAGGACAGAAC  | 24.67477119  |
| plate 12 | F10 | hsa-miR-202-5p   | MIMAT0002810 | UUCCUAUGCAUUAUCUUCUUUG  | -25.04237087 |
| plate 12 | F11 | hsa-miR-337-5p   | MIMAT0004695 | GAACGGCUUCAUCAGGAGUU    | 9.205189565  |
| plate 12 | F12 |                  |              |                         |              |
| plate 12 | G01 |                  |              |                         |              |
| plate 12 | G02 | hsa-miR-7-2-3p   | MIMAT0004554 | CAACAAAUCCCAGUCUACCUAA  | 38.90940287  |
| plate 12 | G03 | hsa-miR-196b-3p  | MIMAT0009201 | UCGACAGCACGACACUGCCUUC  | 48.74539261  |
| plate 12 | G04 | hsa-miR-218-2-3p | MIMAT0004566 | CAUGGUUCUGUCAAGCACCGCG  | -62.62013341 |
| plate 12 | G05 | hsa-miR-2115-3p  | MIMAT0011159 | CAUCAGAAUUAUGGAGGCUAG   | 55.90136259  |
| plate 12 | G06 | hsa-miR-3120-3p  | MIMAT0014982 | CACAGCAAGUGUAGACAGGCA   | -51.56306956 |
| plate 12 | G07 | hsa-miR-1266-5p  | MIMAT0005920 | CCUCAGGGCUGUAGAACAGGGCU | -38.93208877 |
| plate 12 | G08 | hsa-miR-501-5p   | MIMAT0002872 | AAUCCUUUGUCCUGGGUGAGA   | 34.68520009  |
| plate 12 | G09 | hsa-miR-513c-5p  | MIMAT0005789 | UUCUCAAGGAGGUGUCGUUUUAU | 16.41468064  |
| plate 12 | G10 | hsa-miR-559      | MIMAT0003223 | UAAAGUAAAUAUGCACCAAAA   | 15.83387754  |
| plate 12 | G11 | hsa-miR-3142     | MIMAT0015011 | AAGGCCUUUCUGAACCUUCAGA  | 36.67935682  |
| plate 12 | G12 |                  |              |                         |              |
| plate 12 | H01 |                  |              |                         |              |
| plate 12 | H02 |                  |              |                         |              |
| plate 12 | H03 |                  |              |                         |              |
| plate 12 | H04 |                  |              |                         |              |
| plate 12 | H05 |                  |              |                         |              |
| plate 12 | H06 |                  |              |                         |              |
| plate 12 | H07 |                  |              |                         |              |
| plate 12 | H08 |                  |              |                         |              |
| plate 12 | H09 |                  |              |                         |              |
| plate 12 | H10 |                  |              |                         |              |
| plate 12 | H11 |                  |              |                         |              |
| plate 12 | H12 |                  |              |                         |              |
| plate 13 | A01 |                  |              |                         |              |
| plate 13 | A02 |                  |              |                         |              |
| plate 13 | A03 |                  |              |                         |              |
| plate 13 | A04 |                  |              |                         |              |
| plate 13 | A05 |                  |              |                         |              |
| plate 13 | A06 |                  |              |                         |              |
| plate 13 | A07 |                  |              |                         |              |
| plate 13 | A08 |                  |              |                         |              |
| plate 13 | A09 |                  |              |                         |              |
| plate 13 | A10 |                  |              |                         |              |
| plate 13 | A11 |                  |              |                         |              |
| plate 13 | A12 |                  |              |                         |              |
| plate 13 | B01 |                  |              |                         |              |
| plate 13 | B02 |                  |              |                         |              |
| plate 13 | B03 |                  |              |                         |              |
| plate 13 | B04 | hsa-miR-377-5p   | MIMAT0004689 | AGAGGUUGCCCUUGGUGAAUUC  | 6.273073977  |
| plate 13 | B05 | hsa-miR-645      | MIMAT0003315 | UCUAGGCUGGUACUGCUGA     | 2.35062489   |
| plate 13 | B06 | hsa-miR-33a-3p   | MIMAT0004506 | CAAUGUUUCCACAGUGCAUCAC  | 12.5215628   |
| plate 13 | B07 | hsa-miR-1972     | MIMAT0009447 | UCAGGCCAGGCACAGUGGCUCA  | -45.80680948 |
| plate 13 | B08 | hsa-miR-4287     | MIMAT0016917 | UCUCCUUGAGGGCACUUU      | -66.38458084 |
| plate 13 | B09 | hsa-miR-941      | MIMAT0004984 | CACCCGGCUGUGGCACAUGUGC  | 16.24651795  |

|          |     |                   |              |                             |              |
|----------|-----|-------------------|--------------|-----------------------------|--------------|
| plate 13 | B10 | hsa-miR-212-5p    | MIMAT0022695 | ACCUUGGCUCUAGACUGCUUACU     | -34.07969246 |
| plate 13 | B11 | hsa-miR-630       | MIMAT0003299 | AGUAUUCUGUACCAGGGAAGGU      | 2.211647672  |
| plate 13 | B12 |                   |              |                             |              |
| plate 13 | C01 |                   |              |                             |              |
| plate 13 | C02 | hsa-miR-376a-2-5p | MIMAT0022928 | GGUAGAUUUUCCUUCUAUGGU       | 6.735721818  |
| plate 13 | C03 | hsa-miR-1248      | MIMAT0005900 | ACCUUCUUGUAUAAGCACUGUGCUAAA | 3.811714316  |
| plate 13 | C04 | hsa-miR-591       | MIMAT0003259 | AGACCAUGGGUUCUCAUUGU        | 16.12399856  |
| plate 13 | C05 | hsa-miR-1539      | MIMAT0007401 | UCCUGCGGUCUCCAGAUGCC        | -62.23903675 |
| plate 13 | C06 | hsa-miR-620       | MIMAT0003289 | AUGGAGAUAGAUUAGAAU          | -3.464474457 |
| plate 13 | C07 | hsa-miR-935       | MIMAT0004978 | CCAGUUACCGCUUCCGCUACCGC     | 12.77208752  |
| plate 13 | C08 | hsa-miR-380-5p    | MIMAT0000734 | UGGUUGACCAUAGAACAUGCGC      | 5.441039322  |
| plate 13 | C09 | hsa-miR-106a-3p   | MIMAT0004517 | CUGCAAUGUAAGCACUUCUAC       | 2.809615435  |
| plate 13 | C10 | hsa-miR-675-3p    | MIMAT0006790 | CUGUAUGCCCUACCGCUCA         | -62.71631377 |
| plate 13 | C11 | hsa-miR-888-5p    | MIMAT0004916 | UACUCAAAAAGCUGUCAGUCA       | -12.64062808 |
| plate 13 | C12 |                   |              |                             |              |
| plate 13 | D01 |                   |              |                             |              |
| plate 13 | D02 | hsa-miR-764       | MIMAT0010367 | GCAGGUGCUCACUUGUCCUCCU      | -21.59185805 |
| plate 13 | D03 | hsa-miR-1181      | MIMAT0005826 | CCGUCGCCGCCACCCGAGCCG       | -6.915132465 |
| plate 13 | D04 | hsa-miR-877-3p    | MIMAT0004950 | UCCUCUUCUCCUCCUCCAG         | -24.95474097 |
| plate 13 | D05 | hsa-miR-936       | MIMAT0004979 | ACAGUAGAGGGAGGAAUCGCAG      | -18.37892423 |
| plate 13 | D06 | hsa-miR-100-3p    | MIMAT0004512 | CAAGCUUGUAUCUAUAGGUAUG      | 21.90252496  |
| plate 13 | D07 | hsa-miR-192-3p    | MIMAT0004543 | CUGCCAAUUCUAGGUCACAG        | 9.039817785  |
| plate 13 | D08 | hsa-miR-335-3p    | MIMAT0004703 | UUUUUCAUUAUUGCUCCUGACC      | -13.33002822 |
| plate 13 | D09 | hsa-miR-658       | MIMAT0003336 | GGCGGAGGGAAGUAGGUCCGUUGGU   | 2.838873797  |
| plate 13 | D10 | hsa-miR-105-3p    | MIMAT0004516 | ACGGAUGUUUGAGCAUGUGCUA      | 3.155229831  |
| plate 13 | D11 | hsa-miR-320e      | MIMAT0015072 | AAAGCUGGGUUGAGAAGG          | 7.723191518  |
| plate 13 | D12 |                   |              |                             |              |
| plate 13 | E01 |                   |              |                             |              |
| plate 13 | E02 | hsa-miR-450a-1-3p | MIMAT0022700 | AUUGGGAACAUUUUGCAUGUAU      | -13.56409511 |
| plate 13 | E03 | hsa-miR-577       | MIMAT0003242 | UAGAUAAAAUUAUUGGUACCG       | 7.033791376  |
| plate 13 | E04 | hsa-miR-627-5p    | MIMAT0003296 | GUGAGUCUCUAAGAAAAGAGGA      | 1.829460325  |
| plate 13 | E05 | hsa-miR-549a      | MIMAT0003333 | UGACAACUAUGGAUGAGCUCU       | 11.60358171  |
| plate 13 | E06 | hsa-miR-302a-5p   | MIMAT0000683 | ACUUAACGUGGAUGUACUUGCU      | -12.29135639 |
| plate 13 | E07 | hsa-miR-450b-3p   | MIMAT0004910 | UUGGGAUCAUUUUGCAUCCAUA      | -4.536061946 |
| plate 13 | E08 | hsa-miR-876-3p    | MIMAT0004925 | UGGUGUUUACAAAGUAAUUCA       | 8.696032038  |
| plate 13 | E09 | hsa-miR-1252-5p   | MIMAT0005944 | AGAAGGAAAUUGAAUUCAUUUA      | 1.215034734  |
| plate 13 | E10 | hsa-miR-365b-5p   | MIMAT0022833 | AGGGACUUUCAGGGGCAGCUGU      | -28.93570678 |
| plate 13 | E11 | hsa-miR-940       | MIMAT0004983 | AAGGCAGGGCCCCCGCUCCCC       | -18.0552536  |
| plate 13 | E12 |                   |              |                             |              |
| plate 13 | F01 |                   |              |                             |              |
| plate 13 | F02 | hsa-miR-33b-3p    | MIMAT0004811 | CAGUGCCUCGGCAGUGCAGCCC      | -2.295968645 |
| plate 13 | F03 | hsa-miR-767-3p    | MIMAT0003883 | UCUGCUCUAACCCAUUGGUUUCU     | -43.14429858 |
| plate 13 | F04 | hsa-miR-922       | MIMAT0004972 | GCAGCAGAGAAUAGGACUACGUC     | -12.82715013 |
| plate 13 | F05 | hsa-miR-934       | MIMAT0004977 | UGUCUACUACUGGAGACACUGG      | -1.4182178   |
| plate 13 | F06 | hsa-miR-26b-3p    | MIMAT0004500 | CCUGUUCUCCAUAUACUUGGCUC     | -51.28726631 |
| plate 13 | F07 | hsa-miR-103a-2-5p | MIMAT0009196 | AGCUUCUUUACAGUGCUGCCUUG     | -17.66575167 |
| plate 13 | F08 | hsa-miR-148a-5p   | MIMAT0004549 | AAAGUUCUGAGACACUCCGACU      | 5.172228126  |
| plate 13 | F09 | hsa-miR-191-3p    | MIMAT0001618 | GCUGCGCUUGGAUUUCGUCCCC      | -16.06568502 |
| plate 13 | F10 | hsa-miR-374b-3p   | MIMAT0004956 | CUUAGCAGGUUGUAUUAUCAUU      | 0.033728389  |

|          |     |                 |              |                          |              |
|----------|-----|-----------------|--------------|--------------------------|--------------|
| plate 13 | F11 | hsa-miR-411-3p  | MIMAT0004813 | UAUGUAACACGGUCCACUAACC   | 14.65193725  |
| plate 13 | F12 |                 |              |                          |              |
| plate 13 | G01 |                 |              |                          |              |
| plate 13 | G02 | hsa-miR-505-5p  | MIMAT0004776 | GGGAGCCAGGAAGUAUUGAUGU   | -4.985909254 |
| plate 13 | G03 | hsa-miR-548l    | MIMAT0005889 | AAAAGUAUUUGCGGGUUUUGUC   | -4.600064612 |
| plate 13 | G04 | hsa-miR-1292-5p | MIMAT0005943 | UGGGAACGGGUUCCGGCAGACGUG | 9.721903338  |
| plate 13 | G05 | hsa-miR-1307-3p | MIMAT0005951 | ACUCGGCGUGGCGUCGGUCGUG   | -10.48282392 |
| plate 13 | G06 | hsa-miR-30d-3p  | MIMAT0004551 | CUUUCAGUCAGAUGUUUGCUGC   | -2.080188229 |
| plate 13 | G07 | hsa-miR-449c-5p | MIMAT0010251 | UAGGCAGUGUAUUGCUAGCGGUGU | -49.52445003 |
| plate 13 | G08 | hsa-miR-1180-3p | MIMAT0005825 | UUUCCGGCUCGCGUGGGUGUGU   | -4.927392531 |
| plate 13 | G09 | hsa-miR-1273f   | MIMAT0020601 | GGAGAUGGAGGUUGCAGUG      | -33.5932722  |
| plate 13 | G10 | hsa-miR-1273e   | MIMAT0018079 | UUGCUUGAACCCAGGAAGUGGA   | -68.42535156 |
| plate 13 | G11 | hsa-miR-1285-5p | MIMAT0022719 | GAUCUCACUUUGUUGCCCAGG    | 5.660477033  |
| plate 13 | G12 |                 |              |                          |              |
| plate 13 | H01 |                 |              |                          |              |
| plate 13 | H02 |                 |              |                          |              |
| plate 13 | H03 |                 |              |                          |              |
| plate 13 | H04 |                 |              |                          |              |
| plate 13 | H05 |                 |              |                          |              |
| plate 13 | H06 |                 |              |                          |              |
| plate 13 | H07 |                 |              |                          |              |
| plate 13 | H08 |                 |              |                          |              |
| plate 13 | H09 |                 |              |                          |              |
| plate 13 | H10 |                 |              |                          |              |
| plate 13 | H11 |                 |              |                          |              |
| plate 13 | H12 |                 |              |                          |              |
| plate 14 | A01 |                 |              |                          |              |
| plate 14 | A02 |                 |              |                          |              |
| plate 14 | A03 |                 |              |                          |              |
| plate 14 | A04 |                 |              |                          |              |
| plate 14 | A05 |                 |              |                          |              |
| plate 14 | A06 |                 |              |                          |              |
| plate 14 | A07 |                 |              |                          |              |
| plate 14 | A08 |                 |              |                          |              |
| plate 14 | A09 |                 |              |                          |              |
| plate 14 | A10 |                 |              |                          |              |
| plate 14 | A11 |                 |              |                          |              |
| plate 14 | A12 |                 |              |                          |              |
| plate 14 | B01 |                 |              |                          |              |
| plate 14 | B02 |                 |              |                          |              |
| plate 14 | B03 |                 |              |                          |              |
| plate 14 | B04 | hsa-miR-2355-5p | MIMAT0016895 | AUCCCCAGAUACA AUGGACAA   | -81.85919407 |
| plate 14 | B05 | hsa-miR-3130-3p | MIMAT0014994 | GCUGCACCGGAGACUGGGUAA    | 8.119499768  |
| plate 14 | B06 | hsa-miR-4306    | MIMAT0016858 | UGGAGAGAAAGGCAGUA        | 14.44835572  |
| plate 14 | B07 | hsa-miR-1273d   | MIMAT0015090 | GAACCAUGAGGUUGAGGCUGCAGU | -30.66141732 |
| plate 14 | B08 | hsa-miR-1289    | MIMAT0005879 | UGGAGUCCAGGAAUCUGCAUUUU  | -71.50625289 |
| plate 14 | B09 | hsa-miR-518a-5p | MIMAT0005457 | CUGCAAAGGGAAGCCUUUC      | 3.217230199  |
| plate 14 | B10 | hsa-miR-544b    | MIMAT0015004 | ACCUGAGGUUGUGCAUUUCUAA   | -2.079666512 |
| plate 14 | B11 | hsa-miR-3130-5p | MIMAT0014995 | UACCCAGUCUCCGGUGCAGCC    | -72.28439092 |

|          |     |                  |              |                           |              |
|----------|-----|------------------|--------------|---------------------------|--------------|
| plate 14 | B12 |                  |              |                           |              |
| plate 14 | C01 |                  |              |                           |              |
| plate 14 | C02 | hsa-miR-1273a    | MIMAT0005926 | GGGCGACAAAGCAAGACUCUUUCUU | -32.83835109 |
| plate 14 | C03 | hsa-miR-499b-5p  | MIMAT0019897 | ACAGACUUGCUGUGAUGUUCA     | -11.18573414 |
| plate 14 | C04 | hsa-miR-518f-3p  | MIMAT0002842 | GAAAGCGCUUCUCUUUAGAGG     | 11.91940713  |
| plate 14 | C05 | hsa-miR-122-3p   | MIMAT0004590 | AACGCCAUUAUCACACUAAUA     | 6.298286244  |
| plate 14 | C06 | hsa-miR-1272     | MIMAT0005925 | GAUGAUGAUGGCAGCAAUUCUGAAA | -74.52431681 |
| plate 14 | C07 | hsa-miR-323b-3p  | MIMAT0015050 | CCCAUACACGGUCGACCUCUU     | 13.14219546  |
| plate 14 | C08 | hsa-miR-1234-3p  | MIMAT0005589 | UCGGCCUGACCACCCACCCAC     | 0.000926355  |
| plate 14 | C09 | hsa-miR-1197     | MIMAT0005955 | UAGGACACAUGGUCUACUUCU     | 21.11625753  |
| plate 14 | C10 | hsa-miR-556-3p   | MIMAT0004793 | AUAUUACCAUAGCUCAUCUUU     | -38.5224641  |
| plate 14 | C11 | hsa-miR-18b-3p   | MIMAT0004751 | UGCCCUAAAUGCCCUUCUGGC     | -10.23529412 |
| plate 14 | C12 |                  |              |                           |              |
| plate 14 | D01 |                  |              |                           |              |
| plate 14 | D02 | hsa-miR-130a-5p  | MIMAT0004593 | UUCACAUUGUGCUACUGUCUGC    | 7.070866142  |
| plate 14 | D03 | hsa-miR-138-2-3p | MIMAT0004596 | GCUAUUUCACGACACCAGGGUU    | -1.938860584 |
| plate 14 | D04 | hsa-miR-379-3p   | MIMAT0004690 | UAUGUAACAUGGUCCACUAACU    | -33.81843446 |
| plate 14 | D05 | hsa-miR-548k     | MIMAT0005882 | AAAAGUACUUGCAGAUUUUGCU    | 9.546086151  |
| plate 14 | D06 | hsa-miR-548h-5p  | MIMAT0005928 | AAAAGUAAUCGCGGUUUUUGUC    | 23.77119037  |
| plate 14 | D07 | hsa-miR-548k     | MIMAT0005882 | AAAAGUACUUGCAGAUUUUGCU    | 23.40435387  |
| plate 14 | D08 | hsa-miR-550a-3p  | MIMAT0003257 | UGUCUUACUCCUCAGGCACAU     | -51.56924502 |
| plate 14 | D09 | hsa-miR-876-5p   | MIMAT0004924 | UGGAUUUCUUUGUGAAUCACCA    | 12.41408059  |
| plate 14 | D10 | hsa-miR-1255a    | MIMAT0005906 | AGGAUGAGCAAAGAAAGUAGAUU   | 7.760074108  |
| plate 14 | D11 | hsa-miR-1278     | MIMAT0005936 | UAGUACUGUGCAUAUCAUCAU     | 14.2890227   |
| plate 14 | D12 |                  |              |                           |              |
| plate 14 | E01 |                  |              |                           |              |
| plate 14 | E02 | hsa-miR-1306-3p  | MIMAT0005950 | ACGUUGGCUCUGGUGGUG        | -7.070866142 |
| plate 14 | E03 | hsa-miR-718      | MIMAT0012735 | CUUCCGCCCCGCCGGGCGUCG     | -4.780917091 |
| plate 14 | E04 | hsa-miR-2909     | MIMAT0013863 | GUUAGGGCCAACAUCUCUUGG     | -12.49930523 |
| plate 14 | E05 | hsa-miR-4319     | MIMAT0016870 | UCCUGAGCAAAGCCAC          | -43.63779528 |
| plate 14 | E06 | hsa-miR-302e     | MIMAT0005931 | UAAGUGCUUCCAUGCUU         | 21.21074572  |
| plate 14 | E07 | hsa-miR-1469     | MIMAT0007347 | CUCGGCGCGGGCGGGGUCC       | 27.43955535  |
| plate 14 | E08 | hsa-miR-1305     | MIMAT0005893 | UUUUAACUCUAAUGGGAGAGA     | -41.15145901 |
| plate 14 | E09 | hsa-miR-1207-3p  | MIMAT0005872 | UCAGCUGGCCCUCAUUUC        | -7.34877258  |
| plate 14 | E10 | hsa-miR-3163     | MIMAT0015037 | UAUAAAUGAGGGCAGUAAGAC     | -4.410375174 |
| plate 14 | E11 | hsa-miR-2861     | MIMAT0013802 | GGGGCCUGGCGGUGGGCGG       | 9.566465956  |
| plate 14 | E12 |                  |              |                           |              |
| plate 14 | F01 |                  |              |                           |              |
| plate 14 | F02 | hsa-miR-551b-5p  | MIMAT0004794 | GAAAUCAAGCGUGGGUGAGACC    | -3.695229273 |
| plate 14 | F03 | hsa-miR-224-3p   | MIMAT0009198 | AAAUGGUGCCCUAGUGACUACA    | -41.94812413 |
| plate 14 | F04 | hsa-miR-600      | MIMAT0003268 | ACUUAACAGACAAGAGCCUUGCUC  | -79.22278833 |
| plate 14 | F05 | hsa-miR-187-5p   | MIMAT0004561 | GGCUACAACACAGGACCCGGGC    | -55.17091246 |
| plate 14 | F06 | hsa-miR-1205     | MIMAT0005869 | UCUGCAGGGUUUGCUUUGAG      | 18.59657249  |
| plate 14 | F07 | hsa-miR-1229-3p  | MIMAT0005584 | CUCUCACCACUGCCCUCCACAG    | -76.25289486 |
| plate 14 | F08 | hsa-miR-604      | MIMAT0003272 | AGGCUGCGGAAUUCAGGAC       | 7.97869384   |
| plate 14 | F09 | hsa-miR-449b-3p  | MIMAT0009203 | CAGCCACAACUACCCUGCCACU    | -12.86428902 |
| plate 14 | F10 | hsa-let-7g-3p    | MIMAT0004584 | CUGUACAGGCCACUGCCUUGC     | -79.42658638 |
| plate 14 | F11 | hsa-let-7c-3p    | MIMAT0026472 | CUGUACAACCUUCUAGCUUUC     | -52.3770264  |
| plate 14 | F12 |                  |              |                           |              |

|          |     |                 |              |                         |              |
|----------|-----|-----------------|--------------|-------------------------|--------------|
| plate 14 | G01 |                 |              |                         |              |
| plate 14 | G02 | hsa-miR-23c     | MIMAT0018000 | AUCACAUUGCCAGUGAUUACCC  | -37.20333488 |
| plate 14 | G03 | hsa-miR-98-3p   | MIMAT0022842 | CUAUACAACUUACUACUUUCCC  | -11.02640111 |
| plate 14 | G04 | hsa-miR-133a-5p | MIMAT0026478 | AGCUGGUAAAAUGGAACCAAU   | 14.01667439  |
| plate 14 | G05 | hsa-miR-136-3p  | MIMAT0004606 | CAUCAUCGUCUCAAAUGAGUCU  | 7.93052339   |
| plate 14 | G06 | hsa-miR-190a-3p | MIMAT0026482 | CUAUUAUAUCAAAACAUAUUCCU | -4.421491431 |
| plate 14 | G07 | hsa-miR-197-5p  | MIMAT0022691 | CGGGUAGAGAGGGCAGUGGGAGG | -3.75266327  |
| plate 14 | G08 | hsa-miR-204-3p  | MIMAT0022693 | GCUGGGAAGGCAAAGGGACGU   | -0.276980083 |
| plate 14 | G09 | hsa-miR-211-3p  | MIMAT0022694 | GCAGGGACAGCAAAGGGGUGC   | 11.15238536  |
| plate 14 | G10 | hsa-miR-301a-5p | MIMAT0022696 | GCUCUGACUUUAUUGCACUACU  | 9.753589625  |
| plate 14 | G11 | hsa-miR-345-3p  | MIMAT0022698 | GCCUGAACGAGGGGUCUGGAG   | 12.23436776  |
| plate 14 | G12 |                 |              |                         |              |
| plate 14 | H01 |                 |              |                         |              |
| plate 14 | H02 |                 |              |                         |              |
| plate 14 | H03 |                 |              |                         |              |
| plate 14 | H04 |                 |              |                         |              |
| plate 14 | H05 |                 |              |                         |              |
| plate 14 | H06 |                 |              |                         |              |
| plate 14 | H07 |                 |              |                         |              |
| plate 14 | H08 |                 |              |                         |              |
| plate 14 | H09 |                 |              |                         |              |
| plate 14 | H10 |                 |              |                         |              |
| plate 14 | H11 |                 |              |                         |              |
| plate 14 | H12 |                 |              |                         |              |
| plate 15 | A01 |                 |              |                         |              |
| plate 15 | A02 |                 |              |                         |              |
| plate 15 | A03 |                 |              |                         |              |
| plate 15 | A04 |                 |              |                         |              |
| plate 15 | A05 |                 |              |                         |              |
| plate 15 | A06 |                 |              |                         |              |
| plate 15 | A07 |                 |              |                         |              |
| plate 15 | A08 |                 |              |                         |              |
| plate 15 | A09 |                 |              |                         |              |
| plate 15 | A10 |                 |              |                         |              |
| plate 15 | A11 |                 |              |                         |              |
| plate 15 | A12 |                 |              |                         |              |
| plate 15 | B01 |                 |              |                         |              |
| plate 15 | B02 |                 |              |                         |              |
| plate 15 | B03 |                 |              |                         |              |
| plate 15 | B04 | hsa-miR-374c-5p | MIMAT0018443 | AUAAUACAACCUGCUAAGUGCU  | 8.903979759  |
| plate 15 | B05 | hsa-miR-378e    | MIMAT0018927 | ACUGGACUUGGAGUCAGGA     | 19.45623419  |
| plate 15 | B06 | hsa-miR-378h    | MIMAT0018984 | ACUGGACUUGGUGUCAGAUGG   | 31.32875662  |
| plate 15 | B07 | hsa-miR-378b    | MIMAT0014999 | ACUGGACUUGGAGGCAGAA     | -54.99303604 |
| plate 15 | B08 | hsa-miR-378i    | MIMAT0019074 | ACUGGACUAGGAGUCAGAAGG   | 16.16050899  |
| plate 15 | B09 | hsa-miR-378d    | MIMAT0018926 | ACUGGACUUGGAGUCAGAAA    | -56.02650426 |
| plate 15 | B10 | hsa-miR-378f    | MIMAT0018932 | ACUGGACUUGGAGCCAGAAG    | 1.936722735  |
| plate 15 | B11 | hsa-miR-378g    | MIMAT0018937 | ACUGGGCUUGGAGUCAGAAG    | -42.84360346 |
| plate 15 | B12 |                 |              |                         |              |
| plate 15 | C01 |                 |              |                         |              |

|          |     |                   |              |                           |              |
|----------|-----|-------------------|--------------|---------------------------|--------------|
| plate 15 | C02 | hsa-miR-382-3p    | MIMAT0022697 | AAUCAUUCACGGACAACACUU     | -41.07335646 |
| plate 15 | C03 | hsa-miR-450a-2-3p | MIMAT0031074 | AUUGGGGACAUUUUGCAUUCAU    | -24.58484082 |
| plate 15 | C04 | hsa-miR-497-3p    | MIMAT0004768 | CAAACCACACUGUGGUGUUAGA    | 13.39140754  |
| plate 15 | C05 | hsa-miR-506-5p    | MIMAT0022701 | UAUUCAGGAAGGUGUUACUUA     | 10.14513058  |
| plate 15 | C06 | hsa-miR-514a-5p   | MIMAT0022702 | UACUCUGGAGAGUGACAAUCAUG   | -77.57357486 |
| plate 15 | C07 | hsa-miR-514b-3p   | MIMAT0015088 | AUUGACACCUCUGUGAGUGGA     | 19.70347539  |
| plate 15 | C08 | hsa-miR-514b-5p   | MIMAT0015087 | UUCUCAAGAGGGAGGCAAUCAU    | -79.98170415 |
| plate 15 | C09 | hsa-miR-539-3p    | MIMAT0022705 | AUCAUACAAGGACAAUUUCUUU    | 7.034836285  |
| plate 15 | C10 | hsa-miR-545-5p    | MIMAT0004785 | UCAGUAAAUGUUUUAUUAGAUGA   | 3.640214605  |
| plate 15 | C11 | hsa-miR-548e-5p   | MIMAT0026736 | CAAAGCAAUCGCGGUUUUUGC     | -0.206858471 |
| plate 15 | C12 |                   |              |                           |              |
| plate 15 | D01 |                   |              |                           |              |
| plate 15 | D02 | hsa-miR-548q      | MIMAT0011163 | GCUGGUGCAAAGUAAUGGCGG     | -4.034152251 |
| plate 15 | D03 | hsa-miR-548o-3p   | MIMAT0005919 | CCAAAACUGCAGUUACUUUUGC    | 3.009749545  |
| plate 15 | D04 | hsa-miR-548s      | MIMAT0014987 | AUGGCCAAAACUGCAGUUUUUUU   | -0.444210023 |
| plate 15 | D05 | hsa-miR-548am-3p  | MIMAT0019076 | CAAAAACUGCAGUUACUUUUGU    | 8.429276655  |
| plate 15 | D06 | hsa-miR-548ab     | MIMAT0018928 | AAAAGUAAUUGUGGAUUUUUGCU   | 19.28563776  |
| plate 15 | D07 | hsa-miR-548g-5p   | MIMAT0022722 | UGCAAAGUAAUUGCAGUUUUUG    | -89.57713513 |
| plate 15 | D08 | hsa-miR-548w      | MIMAT0015060 | AAAAGUAAACUGCGGUUUUUGCCU  | 12.85736655  |
| plate 15 | D09 | hsa-miR-548ak     | MIMAT0019013 | AAAAGUAAACUGCGGUUUUUGA    | -2.627349822 |
| plate 15 | D10 | hsa-miR-548ag     | MIMAT0018969 | AAAGGUAAUUGUGGUUUUCUGC    | -1.828760745 |
| plate 15 | D11 | hsa-miR-548e-3p   | MIMAT0005874 | AAAACUGAGACUACUUUUGCA     | -9.337475997 |
| plate 15 | D12 |                   |              |                           |              |
| plate 15 | E01 |                   |              |                           |              |
| plate 15 | E02 | hsa-miR-548a-3p   | MIMAT0003251 | CAAAACUGGCAAUACUUUUGC     | -33.50777574 |
| plate 15 | E03 | hsa-miR-561-5p    | MIMAT0022706 | AUCAAGGAUCUUAACUUUGCC     | -12.10904985 |
| plate 15 | E04 | hsa-miR-579-5p    | MIMAT0026616 | UCGCGGUUUGUGCCAGAUGACG    | -9.043258969 |
| plate 15 | E05 | hsa-miR-584-3p    | MIMAT0022708 | UCAGUUCCAGGCCAACAGGCU     | -104.3250727 |
| plate 15 | E06 | hsa-miR-619-5p    | MIMAT0026622 | GCUGGGAUUACAGGCAUGAGCC    | -45.30118099 |
| plate 15 | E07 | hsa-miR-642a-3p   | MIMAT0020924 | AGACACAUUUGGAGAGGGAACC    | 6.542826297  |
| plate 15 | E08 | hsa-miR-642b-3p   | MIMAT0018444 | AGACACAUUUGGAGAGGGACCC    | 18.61314169  |
| plate 15 | E09 | hsa-miR-652-5p    | MIMAT0022709 | CAACCCUAGGAGAGGGUGCCAUJCA | -18.68072096 |
| plate 15 | E10 | hsa-miR-659-5p    | MIMAT0022710 | AGGACCUUCCUGAACCAAGGA     | -58.47666455 |
| plate 15 | E11 | hsa-miR-660-3p    | MIMAT0022711 | ACCUCCUGUGUGCAUGGAUUA     | -58.24178541 |
| plate 15 | E12 |                   |              |                           |              |
| plate 15 | F01 |                   |              |                           |              |
| plate 15 | F02 | hsa-miR-664b-3p   | MIMAT0022272 | UUCAUUUGCCUCCAGCCUACA     | -96.73971271 |
| plate 15 | F03 | hsa-miR-664a-5p   | MIMAT0005948 | ACUGGCUAGGGAAAUGAUUGGAU   | -43.1205136  |
| plate 15 | F04 | hsa-miR-664b-5p   | MIMAT0022271 | UGGGCUAAGGGAGAUGAUUGGGUA  | -3.895697179 |
| plate 15 | F05 | hsa-miR-744-3p    | MIMAT0004946 | CUGUUGCCACUAACCUAACCU     | -79.32898738 |
| plate 15 | F06 | hsa-miR-766-5p    | MIMAT0022714 | AGGAGGAAUUGGUGCUGGUCUU    | 12.60270812  |
| plate 15 | F07 | hsa-miR-873-3p    | MIMAT0022717 | GGAGACUGAUGAGUUCGCGGA     | -69.80278394 |
| plate 15 | F08 | hsa-miR-874-5p    | MIMAT0026718 | CGGCCCCACGCACCAGGGUAAGA   | -17.92416288 |
| plate 15 | F09 | hsa-miR-887-3p    | MIMAT0004951 | GUGAACGGGCGCAUCCGAGG      | 8.607290319  |
| plate 15 | F10 | hsa-miR-1185-2-3p | MIMAT0022713 | AUAUACAGGGGGAGACUCUCAU    | -96.03013046 |
| plate 15 | F11 | hsa-miR-1185-1-3p | MIMAT0022838 | AUAUACAGGGGGAGACUCUUAU    | -94.40081095 |
| plate 15 | F12 |                   |              |                           |              |
| plate 15 | G01 |                   |              |                           |              |
| plate 15 | G02 | hsa-miR-1247-3p   | MIMAT0022721 | CCCCGGAACGUCGAGACUGGAGC   | -63.11738188 |

|          |     |                  |              |                          |              |
|----------|-----|------------------|--------------|--------------------------|--------------|
| plate 15 | G03 | hsa-miR-1260b    | MIMAT0015041 | AUCCACCACUGCCACCAU       | -110.429458  |
| plate 15 | G04 | hsa-miR-1269b    | MIMAT0019059 | CUGGACUGAGCCAUGCUACUGG   | -39.69869539 |
| plate 15 | G05 | hsa-miR-1271-3p  | MIMAT0022712 | AGUGCCUGCUAUGUGCCAGGCA   | -9.243524341 |
| plate 15 | G06 | hsa-miR-1273g-3p | MIMAT0022742 | ACCACUGCACUCCAGCCUGAG    | -77.68977822 |
| plate 15 | G07 | hsa-miR-1276     | MIMAT0005930 | UAAAGAGCCCUGUGGAGACA     | -24.51561328 |
| plate 15 | G08 | hsa-miR-1277-3p  | MIMAT0005933 | UACGUAGAUUAUAUGUAUUUU    | 13.98973125  |
| plate 15 | G09 | hsa-miR-1287-5p  | MIMAT0005878 | UGCUGGAUCAGUGGUUCGAGUC   | 0.304930814  |
| plate 15 | G10 | hsa-miR-1294     | MIMAT0005884 | UGUGAGGUUGGCAUUGUUGUCU   | -11.96317754 |
| plate 15 | G11 | hsa-miR-1295a    | MIMAT0005885 | UUAGGCCGCAGAUUCUGGGUGA   | -27.1141183  |
| plate 15 | G12 |                  |              |                          |              |
| plate 15 | H01 |                  |              |                          |              |
| plate 15 | H02 |                  |              |                          |              |
| plate 15 | H03 |                  |              |                          |              |
| plate 15 | H04 |                  |              |                          |              |
| plate 15 | H05 |                  |              |                          |              |
| plate 15 | H06 |                  |              |                          |              |
| plate 15 | H07 |                  |              |                          |              |
| plate 15 | H08 |                  |              |                          |              |
| plate 15 | H09 |                  |              |                          |              |
| plate 15 | H10 |                  |              |                          |              |
| plate 15 | H11 |                  |              |                          |              |
| plate 15 | H12 |                  |              |                          |              |
| plate 16 | A01 |                  |              |                          |              |
| plate 16 | A02 |                  |              |                          |              |
| plate 16 | A03 |                  |              |                          |              |
| plate 16 | A04 |                  |              |                          |              |
| plate 16 | A05 |                  |              |                          |              |
| plate 16 | A06 |                  |              |                          |              |
| plate 16 | A07 |                  |              |                          |              |
| plate 16 | A08 |                  |              |                          |              |
| plate 16 | A09 |                  |              |                          |              |
| plate 16 | A10 |                  |              |                          |              |
| plate 16 | A11 |                  |              |                          |              |
| plate 16 | A12 |                  |              |                          |              |
| plate 16 | B01 |                  |              |                          |              |
| plate 16 | B02 |                  |              |                          |              |
| plate 16 | B03 |                  |              |                          |              |
| plate 16 | B04 | hsa-miR-1304-3p  | MIMAT0022720 | UCUCACUGUAGCCUCGAACCCC   | -75.36456138 |
| plate 16 | B05 | hsa-miR-1306-5p  | MIMAT0022726 | CCACCUCCCCUGCAAACGUCCA   | -44.99736218 |
| plate 16 | B06 | hsa-miR-1307-5p  | MIMAT0022727 | UCGACCGGACCUCGACCGGCU    | -6.472116135 |
| plate 16 | B07 | hsa-miR-2116-3p  | MIMAT0011161 | CCUCCAUGCCAAGAACUCCC     | -15.78423924 |
| plate 16 | B08 | hsa-miR-2277-5p  | MIMAT0017352 | AGCGCGGGCUGAGCGCUGCCAGUC | -15.20492931 |
| plate 16 | B09 | hsa-miR-2355-3p  | MIMAT0017950 | AUUGUCCUUGCUGUUUGGAGAU   | -22.29977206 |
| plate 16 | B10 | hsa-miR-3117-3p  | MIMAT0014979 | AUAGGACUCAUAUAGUGCCAG    | -44.61115557 |
| plate 16 | B11 | hsa-miR-3123     | MIMAT0014985 | CAGAGAAUUGUUUAUC         | -5.03179263  |
| plate 16 | B12 |                  |              |                          |              |
| plate 16 | C01 |                  |              |                          |              |
| plate 16 | C02 | hsa-miR-3124-5p  | MIMAT0014986 | UUCGCGGGCGAAGGCAAAGUC    | -35.52848463 |
| plate 16 | C03 | hsa-miR-3127-5p  | MIMAT0014990 | AUCAGGGCUUGUGGAAUGGGAAG  | -9.245988373 |

|          |     |                  |              |                           |              |
|----------|-----|------------------|--------------|---------------------------|--------------|
| plate 16 | C04 | hsa-miR-3131     | MIMAT0014996 | UCGAGGACUGGUGGAAGGGCCUU   | -19.61677197 |
| plate 16 | C05 | hsa-miR-3135b    | MIMAT0018985 | GGCUGGAGCGAGUGCAGUGGUG    | -29.45368171 |
| plate 16 | C06 | hsa-miR-3136-5p  | MIMAT0015003 | CUGACUGAAUAGGUAGGGUCAUU   | -17.71981593 |
| plate 16 | C07 | hsa-miR-3138     | MIMAT0015006 | UGUGGACAGUGAGGUAGAGGGAGU  | -27.55445387 |
| plate 16 | C08 | hsa-miR-3140-3p  | MIMAT0015008 | AGCUUUUGGAAUUCAGGUAGU     | -24.64427341 |
| plate 16 | C09 | hsa-miR-3141     | MIMAT0015010 | GAGGGCGGGUGGAGGAGGA       | 11.52284046  |
| plate 16 | C10 | hsa-miR-3143     | MIMAT0015012 | AUAACAUUGUAAAGCGCUUCUUUCG | -13.52606642 |
| plate 16 | C11 | hsa-miR-3144-5p  | MIMAT0015014 | AGGGGACCAAAGAGAUUAUAG     | -24.20581531 |
| plate 16 | C12 |                  |              |                           |              |
| plate 16 | D01 |                  |              |                           |              |
| plate 16 | D02 | hsa-miR-3147     | MIMAT0015019 | GGUUGGGCAGUGAGGAGGGUGUGA  | -10.97483094 |
| plate 16 | D03 | hsa-miR-3150b-3p | MIMAT0018194 | UGAGGAGAUUCGUCGAGGUUGG    | -24.98050035 |
| plate 16 | D04 | hsa-miR-3158-3p  | MIMAT0015032 | AAGGGCUUCCUCUCUCAGGAC     | -28.87437178 |
| plate 16 | D05 | hsa-miR-3164     | MIMAT0015038 | UGUGACUUUAAGGGAAAUGGCG    | -43.1322114  |
| plate 16 | D06 | hsa-miR-3168     | MIMAT0015043 | GAGUUCUACAGUCAGAC         | -3.043964449 |
| plate 16 | D07 | hsa-miR-3175     | MIMAT0015052 | CGGGGAGAGAACGCAGUGACGU    | 8.201463546  |
| plate 16 | D08 | hsa-miR-3178     | MIMAT0015055 | GGGGCGCGCCGGAUCG          | -23.5083716  |
| plate 16 | D09 | hsa-miR-3180     | MIMAT0018178 | UGGGGCGGAGCUUCCGGAG       | -12.26748721 |
| plate 16 | D10 | hsa-miR-3180-5p  | MIMAT0015057 | CUUCCAGACGCUCGCCCCACGUCG  | -18.08330452 |
| plate 16 | D11 | hsa-miR-3182     | MIMAT0015062 | GCUUCUGUAGUGUAGUC         | -4.672847655 |
| plate 16 | D12 |                  |              |                           |              |
| plate 16 | E01 |                  |              |                           |              |
| plate 16 | E02 | hsa-miR-3187-3p  | MIMAT0015069 | UUGCCAUGGGGCGUCGCGG       | -15.67064905 |
| plate 16 | E03 | hsa-miR-3190-3p  | MIMAT0022839 | UGUGGAAGGUAGACGGCCAGAGA   | -15.5752333  |
| plate 16 | E04 | hsa-miR-3192-5p  | MIMAT0015076 | UCUGGGAGGUUGUAGCAGUGGAA   | -36.15095883 |
| plate 16 | E05 | hsa-miR-3198     | MIMAT0015083 | GUGGAGUCCUGGGGAAUGGAGA    | -28.5086114  |
| plate 16 | E06 | hsa-miR-3199     | MIMAT0015084 | AGGGACUGCCUAGGAGAAAGUU    | -1.271957613 |
| plate 16 | E07 | hsa-miR-3200-5p  | MIMAT0017392 | AAUCUGAGAAGGCGCACAAGGU    | -11.61320776 |
| plate 16 | E08 | hsa-miR-3200-3p  | MIMAT0015085 | CACCUUGCGCUACUCAGGUCUG    | -36.79387926 |
| plate 16 | E09 | hsa-miR-3605-5p  | MIMAT0017981 | UGAGGAUGGAUAGCAAGGAAGCC   | -10.33872592 |
| plate 16 | E10 | hsa-miR-3607-5p  | MIMAT0017984 | GCAUGUGAUGAAGCAAUCAGU     | -58.12157179 |
| plate 16 | E11 | hsa-miR-3609     | MIMAT0017986 | CAAAGUGAUGAGUAAUACUGGCUG  | -31.24613478 |
| plate 16 | E12 |                  |              |                           |              |
| plate 16 | F01 |                  |              |                           |              |
| plate 16 | F02 | hsa-miR-3611     | MIMAT0017988 | UUGUGAAGAAAGAAUUCUUA      | -11.59503333 |
| plate 16 | F03 | hsa-miR-3613-5p  | MIMAT0017990 | UGUUGUACUUUUUUUUUGUUC     | -7.2627038   |
| plate 16 | F04 | hsa-miR-3613-3p  | MIMAT0017991 | ACAAAAAAAAAAGCCCAACCCUUC  | -79.59465975 |
| plate 16 | F05 | hsa-miR-3614-5p  | MIMAT0017992 | CCACUUGGAUCUGAAGGCUGCCC   | -66.47953736 |
| plate 16 | F06 | hsa-miR-3615     | MIMAT0017994 | UCUCUCGGCUCCUCGCGGCUC     | -0.690375883 |
| plate 16 | F07 | hsa-miR-3622a-5p | MIMAT0018003 | CAGGCACGGGAGCUCAGGUGAG    | -28.7607816  |
| plate 16 | F08 | hsa-miR-3656     | MIMAT0018076 | GGCGGGUGCGGGGGUGG         | 0.338751164  |
| plate 16 | F09 | hsa-miR-3664-3p  | MIMAT0019220 | UCUCAGGAGUAAAGACAGAGUU    | -57.74899599 |
| plate 16 | F10 | hsa-miR-3679-5p  | MIMAT0018104 | UGAGGAUAUGGCAGGGAAGGGGA   | -39.83355252 |
| plate 16 | F11 | hsa-miR-3687     | MIMAT0018115 | CCCGGACAGGCGUUCGUGCGACGU  | -9.559497275 |
| plate 16 | F12 |                  |              |                           |              |
| plate 16 | G01 |                  |              |                           |              |
| plate 16 | G02 | hsa-miR-3690     | MIMAT0018119 | ACCUGGACCCAGCGUAGACAAAG   | -43.9477889  |
| plate 16 | G03 | hsa-miR-3909     | MIMAT0018183 | UGUCCUCUAGGGCCUGCAGUCU    | -11.27016541 |
| plate 16 | G04 | hsa-miR-3913-5p  | MIMAT0018187 | UUUGGACUGAUCUUGAUGUCU     | -58.91443125 |

|          |     |                 |              |                            |              |
|----------|-----|-----------------|--------------|----------------------------|--------------|
| plate 16 | G05 | hsa-miR-3916    | MIMAT0018190 | AAGAGGAAGAAAUGGCUGGUUCUCAG | -48.14835383 |
| plate 16 | G06 | hsa-miR-3928-3p | MIMAT0018205 | GGAGGAACCUUGGAGCUUCGGC     | 12.69736294  |
| plate 16 | G07 | hsa-miR-3929    | MIMAT0018206 | GAGGCUGAUGUGAGUAGACCACU    | 6.481708194  |
| plate 16 | G08 | hsa-miR-3934-5p | MIMAT0018349 | UCAGGUGUGGAAACUGAGGCAG     | -59.41877166 |
| plate 16 | G09 | hsa-miR-3960    | MIMAT0019337 | GGCGGCGGCGGAGGCGGGGG       | 13.89233165  |
| plate 16 | G10 | hsa-miR-4284    | MIMAT0016915 | GGGCUACAUCACCCCAU          | -45.67663147 |
| plate 16 | G11 | hsa-miR-4328    | MIMAT0016926 | CCAGUUUCCCAGGAUU           | -10.67722466 |
| plate 16 | G12 |                 |              |                            |              |
| plate 16 | H01 |                 |              |                            |              |
| plate 16 | H02 |                 |              |                            |              |
| plate 16 | H03 |                 |              |                            |              |
| plate 16 | H04 |                 |              |                            |              |
| plate 16 | H05 |                 |              |                            |              |
| plate 16 | H06 |                 |              |                            |              |
| plate 16 | H07 |                 |              |                            |              |
| plate 16 | H08 |                 |              |                            |              |
| plate 16 | H09 |                 |              |                            |              |
| plate 16 | H10 |                 |              |                            |              |
| plate 16 | H11 |                 |              |                            |              |
| plate 16 | H12 |                 |              |                            |              |
| plate 17 | A01 |                 |              |                            |              |
| plate 17 | A02 |                 |              |                            |              |
| plate 17 | A03 |                 |              |                            |              |
| plate 17 | A04 |                 |              |                            |              |
| plate 17 | A05 |                 |              |                            |              |
| plate 17 | A06 |                 |              |                            |              |
| plate 17 | A07 |                 |              |                            |              |
| plate 17 | A08 |                 |              |                            |              |
| plate 17 | A09 |                 |              |                            |              |
| plate 17 | A10 |                 |              |                            |              |
| plate 17 | A11 |                 |              |                            |              |
| plate 17 | A12 |                 |              |                            |              |
| plate 17 | B01 |                 |              |                            |              |
| plate 17 | B02 |                 |              |                            |              |
| plate 17 | B03 |                 |              |                            |              |
| plate 17 | B04 | hsa-miR-4417    | MIMAT0018929 | GGUGGGCUUCCCGGAGGG         | 29.68172583  |
| plate 17 | B05 | hsa-miR-4419a   | MIMAT0018931 | UGAGGGAGGAGACUGCA          | -77.99265971 |
| plate 17 | B06 | hsa-miR-4421    | MIMAT0018934 | ACCUGUCUGUGGAAAGGAGCUA     | -11.82307322 |
| plate 17 | B07 | hsa-miR-4425    | MIMAT0018940 | UGUUGGGAUUCAGCAGGACCAU     | 27.37619587  |
| plate 17 | B08 | hsa-miR-4429    | MIMAT0018944 | AAAAGCUGGGCUGAGAGGCG       | -3.968492065 |
| plate 17 | B09 | hsa-miR-4435    | MIMAT0018951 | AUGGCCAGAGCUCACACAGAGG     | -39.05462557 |
| plate 17 | B10 | hsa-miR-4443    | MIMAT0018961 | UUGGAGCGUGGGUUUUU          | 35.36227113  |
| plate 17 | B11 | hsa-miR-4448    | MIMAT0018967 | GGCUCCUUGGUCUAGGGGUA       | 31.03348522  |
| plate 17 | B12 |                 |              |                            |              |
| plate 17 | C01 |                 |              |                            |              |
| plate 17 | C02 | hsa-miR-4451    | MIMAT0018973 | UGGUAGAGCUGAGGACA          | 25.10047124  |
| plate 17 | C03 | hsa-miR-4454    | MIMAT0018976 | GGAUCCGAGUCACGGCACCA       | 49.63025806  |
| plate 17 | C04 | hsa-miR-4455    | MIMAT0018977 | AGGGUGUGUGUUUUUU           | 19.85999287  |
| plate 17 | C05 | hsa-miR-4458    | MIMAT0018980 | AGAGGUAGGUGUGGAAGAA        | 22.3566276   |

|          |     |                 |              |                         |              |
|----------|-----|-----------------|--------------|-------------------------|--------------|
| plate 17 | C06 | hsa-miR-4459    | MIMAT0018981 | CCAGGAGGCGGAGGAGGUGGAG  | 2.472965786  |
| plate 17 | C07 | hsa-miR-4461    | MIMAT0018983 | GAUUGAGACUAGUAGGGCUAGGC | 13.86035521  |
| plate 17 | C08 | hsa-miR-4484    | MIMAT0019018 | AAAAGGCGGGAGAAGCCCA     | 1.813742011  |
| plate 17 | C09 | hsa-miR-4485    | MIMAT0019019 | UAACGGCCGCGGUACCCUA     | 24.76209307  |
| plate 17 | C10 | hsa-miR-4492    | MIMAT0019027 | GGGGCUGGGCGCGCGCC       | 48.56077268  |
| plate 17 | C11 | hsa-miR-4497    | MIMAT0019032 | CUCCGGGACGGCUGGGC       | 45.53114852  |
| plate 17 | C12 |                 |              |                         |              |
| plate 17 | D01 |                 |              |                         |              |
| plate 17 | D02 | hsa-miR-4500    | MIMAT0019036 | UGAGGUAGUAGUUUCUU       | 8.409486277  |
| plate 17 | D03 | hsa-miR-4502    | MIMAT0019038 | GCUGAUGAUGAUGGUGCUGAAG  | 13.98132979  |
| plate 17 | D04 | hsa-miR-4508    | MIMAT0019045 | GCGGGCUGGGCGCGCG        | 31.79615102  |
| plate 17 | D05 | hsa-miR-4510    | MIMAT0019047 | UGAGGGAGUAGGAUGUAUGGUU  | -12.41917983 |
| plate 17 | D06 | hsa-miR-4516    | MIMAT0019053 | GGGAGAAGGGUCGGGGC       | 28.91730677  |
| plate 17 | D07 | hsa-miR-4521    | MIMAT0019058 | GCUAAGGAAGUCCUGUGCUCAG  | -61.15440135 |
| plate 17 | D08 | hsa-miR-4525    | MIMAT0019064 | GGGGGAUGUGCAUGCUGGUU    | -30.62147036 |
| plate 17 | D09 | hsa-miR-4531    | MIMAT0019070 | AUGGAGAAGGCUUCUGA       | 26.70645256  |
| plate 17 | D10 | hsa-miR-4647    | MIMAT0019709 | GAAGAUGGUGCUGUGCUGAGGAA | 26.34528209  |
| plate 17 | D11 | hsa-miR-4667-5p | MIMAT0019743 | ACUGGGGAGCAGAAGGAGAACC  | 20.44382669  |
| plate 17 | D12 |                 |              |                         |              |
| plate 17 | E01 |                 |              |                         |              |
| plate 17 | E02 | hsa-miR-4695-3p | MIMAT0019789 | UGAUCUCACCGCUGCCUCCUUC  | -39.15280784 |
| plate 17 | E03 | hsa-miR-4741    | MIMAT0019871 | CGGGCUGUCCGGAGGGGUCGGCU | 32.28706234  |
| plate 17 | E04 | hsa-miR-4791    | MIMAT0019963 | UGGAUAUGAUGACUGAAA      | 27.42879351  |
| plate 17 | E05 | hsa-miR-4804-5p | MIMAT0019984 | UUGGACGGUAAGGUUAAGCAA   | 26.78008926  |
| plate 17 | E06 | hsa-miR-4999-5p | MIMAT0021017 | UGCUGUAUUGUCAGGUAGUGA   | 25.86664355  |
| plate 17 | E07 | hsa-miR-5001-5p | MIMAT0021021 | AGGGCUGGACUCAGCGCGGAGCU | 24.90936647  |
| plate 17 | E08 | hsa-miR-5010-5p | MIMAT0021043 | AGGGGAUGGCAGAGCAAAAUU   | 33.94914782  |
| plate 17 | E09 | hsa-miR-5090    | MIMAT0021082 | CCGGGCAGAUUGGUGUAGGGUG  | 37.96585439  |
| plate 17 | E10 | hsa-miR-5095    | MIMAT0020600 | UUACAGGCGUGAACCCACCGCG  | -77.26681225 |
| plate 17 | E11 | hsa-miR-5096    | MIMAT0020603 | GUUUCACCAUGUUGGUCAGGC   | -32.21693215 |
| plate 17 | E12 |                 |              |                         |              |
| plate 17 | F01 |                 |              |                         |              |
| plate 17 | F02 | hsa-miR-5100    | MIMAT0022259 | UUCAGAUCCAGCGGUGCCUCU   | -23.93806335 |
| plate 17 | F03 | hsa-miR-5187-5p | MIMAT0021117 | UGGGAUGAGGGAUUGAAGUGGA  | 17.75433395  |
| plate 17 | F04 | hsa-miR-5196-3p | MIMAT0021129 | UCAUCCUCGUCUCCUCCAG     | 40.53612581  |
| plate 17 | F05 | hsa-miR-5571-5p | MIMAT0022257 | CAAUUCUCAAAGGAGCCUCCC   | 20.21239707  |
| plate 17 | F06 | hsa-miR-5585-3p | MIMAT0022286 | CUGAAUAGCUGGGACUACAGGU  | -32.17310079 |
| plate 17 | F07 | hsa-miR-5699-5p | MIMAT0027103 | UGCCCCAACAAGGAAGGACAAG  | -95.94949458 |
| plate 17 | F08 | hsa-miR-6087    | MIMAT0023712 | UGAGGCGGGGGGCGAGC       | 34.51369584  |
| plate 17 | F09 | hsa-miR-6126    | MIMAT0024599 | GUGAAGGCCCGCGGAGA       | 32.84810386  |
| plate 17 | F10 | hsa-miR-6128    | MIMAT0024611 | ACUGGAAUUGGAGUCAAAA     | 30.55659993  |
| plate 17 | F11 | hsa-miR-6129    | MIMAT0024613 | UGAGGGAGUUGGGUGUAUA     | 6.785972404  |
| plate 17 | F12 |                 |              |                         |              |
| plate 17 | G01 |                 |              |                         |              |
| plate 17 | G02 | hsa-miR-6130    | MIMAT0024614 | UGAGGGAGUUGGAUUGUAUG    | 4.808301077  |
| plate 17 | G03 | hsa-miR-6133    | MIMAT0024617 | UGAGGGAGGAGGUUGGGUA     | 20.24570891  |
| plate 17 | G04 | hsa-miR-6134    | MIMAT0024618 | UGAGGUUGUAGGAUGUAGA     | 2.692122627  |
| plate 17 | G05 | hsa-miR-6503-3p | MIMAT0025463 | GGGACUAGGAUGCAGACCUCC   | -16.7882906  |
| plate 17 | G06 | hsa-miR-6503-5p | MIMAT0025462 | AGGUCUGCAUUCAAAUCCCAGA  | -43.51665884 |

|          |     |                  |              |                          |              |
|----------|-----|------------------|--------------|--------------------------|--------------|
| plate 17 | G07 | hsa-miR-6510-3p  | MIMAT0025477 | CACCGACUCUGUCUCCUGCAG    | 29.56951752  |
| plate 17 | G08 | hsa-miR-6511a-5p | MIMAT0025478 | CAGGCAGAAGUGGGGCUGACAGG  | 26.59950402  |
| plate 17 | G09 | hsa-miR-6515-5p  | MIMAT0025486 | UUGGAGGGUGUGGAAGACAUC    | -34.20336976 |
| plate 17 | G10 | hsa-miR-6720-3p  | MIMAT0025851 | CGCGCCUGCAGGAACUGGUAGA   | 34.98356811  |
| plate 17 | G11 | hsa-miR-6721-5p  | MIMAT0025852 | UGGGCAGGGGCUUUAUUGUAGGAG | 8.819747882  |
| plate 17 | G12 |                  |              |                          |              |
| plate 17 | H01 |                  |              |                          |              |
| plate 17 | H02 |                  |              |                          |              |
| plate 17 | H03 |                  |              |                          |              |
| plate 17 | H04 |                  |              |                          |              |
| plate 17 | H05 |                  |              |                          |              |
| plate 17 | H06 |                  |              |                          |              |
| plate 17 | H07 |                  |              |                          |              |
| plate 17 | H08 |                  |              |                          |              |
| plate 17 | H09 |                  |              |                          |              |
| plate 17 | H10 |                  |              |                          |              |
| plate 17 | H11 |                  |              |                          |              |
| plate 17 | H12 |                  |              |                          |              |
| plate 18 | A01 |                  |              |                          |              |
| plate 18 | A02 |                  |              |                          |              |
| plate 18 | A03 |                  |              |                          |              |
| plate 18 | A04 |                  |              |                          |              |
| plate 18 | A05 |                  |              |                          |              |
| plate 18 | A06 |                  |              |                          |              |
| plate 18 | A07 |                  |              |                          |              |
| plate 18 | A08 |                  |              |                          |              |
| plate 18 | A09 |                  |              |                          |              |
| plate 18 | A10 |                  |              |                          |              |
| plate 18 | A11 |                  |              |                          |              |
| plate 18 | A12 |                  |              |                          |              |
| plate 18 | B01 |                  |              |                          |              |
| plate 18 | B02 |                  |              |                          |              |
| plate 18 | B03 |                  |              |                          |              |
| plate 18 | B04 | hsa-miR-6723-5p  | MIMAT0025855 | AUAGUCCGAGUAACGUCGGGGC   | 23.0373556   |
| plate 18 | B05 | hsa-miR-6724-5p  | MIMAT0025856 | CUGGGCCCGCGCGGGCGUGGGG   | 22.01252785  |
| plate 18 | B06 | hsa-miR-6735-5p  | MIMAT0027371 | CAGGGCAGAGGGCACAGAAUCUGA | -2.852306353 |
| plate 18 | B07 | hsa-miR-6767-5p  | MIMAT0027434 | UCGCAGACAGGGACACAUGGAGA  | -15.95125415 |
| plate 18 | B08 | hsa-miR-6803-5p  | MIMAT0027506 | CUGGGGGUGGGGGGCGUGGGCGU  | 18.70048875  |
| plate 18 | B09 | hsa-miR-6805-5p  | MIMAT0027510 | UAGGGGGCGGCUUGUGGAGUGU   | 25.93907096  |
| plate 18 | B10 | hsa-miR-6839-5p  | MIMAT0027580 | UCUGGAUUGAAGAGACGACCCA   | -23.3940166  |
| plate 18 | B11 | hsa-miR-6852-5p  | MIMAT0027604 | CCUGGGGUUCUGAGGACAUG     | -10.03591696 |
| plate 18 | B12 |                  |              |                          |              |
| plate 18 | C01 |                  |              |                          |              |
| plate 18 | C02 | hsa-miR-6882-5p  | MIMAT0027664 | UACAAGUCAGGAGCUGAAGCAG   | -68.20765305 |
| plate 18 | C03 | hsa-miR-7641     | MIMAT0029782 | UUGAUCUCGGAAGCUAAGC      | 11.7819198   |
| plate 18 | C04 | hsa-miR-7704     | MIMAT0030019 | CGGGGUCGGCGGCGACGUG      | 22.39536581  |
| plate 18 | C05 | hsa-miR-7977     | MIMAT0031180 | UUCCCAGCCAACGCACCA       | -5.492906591 |
| plate 18 | C06 | hsa-miR-1910-3p  | MIMAT0026917 | GAGGCAGAAGCAGGAUGACA     | 25.03792932  |
| plate 18 | C07 | hsa-miR-759      | MIMAT0010497 | GCAGAGUGCAAACAAUUUUGAC   | 14.89174193  |

|          |     |                  |              |                          |              |
|----------|-----|------------------|--------------|--------------------------|--------------|
| plate 18 | C08 | hsa-miR-3653     | MIMAT0018073 | CUAAGAAGUUGACUGAAG       | 36.07347871  |
| plate 18 | C09 | hsa-miR-3691-5p  | MIMAT0018120 | AGUGGAUGAUGGAGACUCGGUAC  | 26.41810922  |
| plate 18 | C10 | hsa-miR-4326     | MIMAT0016888 | UGUCCUCUGUCUCCAGAC       | 13.35450031  |
| plate 18 | C11 | hsa-miR-4524a-3p | MIMAT0019063 | UGAGACAGGCUUAUGCUGCUAU   | -27.15171835 |
| plate 18 | C12 |                  |              |                          |              |
| plate 18 | D01 |                  |              |                          |              |
| plate 18 | D02 | hsa-miR-4423-3p  | MIMAT0018936 | AUAGGCACCAAAAAGCAACAA    | -56.75000027 |
| plate 18 | D03 | hsa-miR-4753-5p  | MIMAT0019890 | CAAGGCCAAAGGAAGAGAACAG   | -58.38540548 |
| plate 18 | D04 | hsa-miR-4750-5p  | MIMAT0019887 | CUCGGGCGGAGGUGGUUGAGUG   | 18.93411806  |
| plate 18 | D05 | hsa-miR-6731-5p  | MIMAT0027363 | UGGGAGAGCAGGGUAAUUGUGGA  | 20.06496247  |
| plate 18 | D06 | hsa-miR-887-5p   | MIMAT0026720 | CUUGGGAGCCUGUUAGACUC     | -33.45382004 |
| plate 18 | D07 | hsa-miR-3129-5p  | MIMAT0014992 | GCAGUAGUGUAGAGAUUGGUUU   | 36.64871727  |
| plate 18 | D08 | hsa-miR-6511b-3p | MIMAT0025848 | CCUCACCACCCUUCUGCCUGCA   | -9.236865441 |
| plate 18 | D09 | hsa-miR-6511a-3p | MIMAT0025479 | CCUCACCAUCCUUCUGCCUGC    | -43.24858181 |
| plate 18 | D10 | hsa-miR-6825-5p  | MIMAT0027550 | UGGGGAGGUGUGGAGUCAGCAU   | 17.1436144   |
| plate 18 | D11 | hsa-miR-548u     | MIMAT0015013 | CAAAGACUGCAAUUACUUUUGCG  | -32.44666173 |
| plate 18 | D12 |                  |              |                          |              |
| plate 18 | E01 |                  |              |                          |              |
| plate 18 | E02 | hsa-miR-3940-3p  | MIMAT0018356 | CAGCCCGGAUCCAGCCACUU     | -2.194610383 |
| plate 18 | E03 | hsa-miR-518e-5p  | MIMAT0005450 | CUCUAGAGGGAAGCGCUUUCUG   | 14.41663022  |
| plate 18 | E04 | hsa-miR-548t-5p  | MIMAT0015009 | CAAAGUGAUCGUGGUUUUUG     | 9.477038994  |
| plate 18 | E05 | hsa-miR-3662     | MIMAT0018083 | GAAAUGAUGAGUAGUGACUGAUG  | 10.25056799  |
| plate 18 | E06 | hsa-miR-4787-5p  | MIMAT0019956 | GCGGGGUGGCGGCGCAUCCC     | 39.25790517  |
| plate 18 | E07 | hsa-miR-3910     | MIMAT0018184 | AAAGGCAUAAAACCAAGACA     | 39.16759468  |
| plate 18 | E08 | hsa-miR-4520b-3p | MIMAT0020300 | UUUGGACAGAAAACACGCAGGU   | -19.69324973 |
| plate 18 | E09 | hsa-miR-711      | MIMAT0012734 | GGGACCCAGGGAGAGACGUAAG   | -7.116532164 |
| plate 18 | E10 | hsa-miR-1908-3p  | MIMAT0026916 | CCGGCCGCCGCCUCCGCCCG     | 30.70589429  |
| plate 18 | E11 | hsa-miR-3606-5p  | MIMAT0017983 | UUAGUGAAGGCUAUUUUAAUU    | 19.97857853  |
| plate 18 | E12 |                  |              |                          |              |
| plate 18 | F01 |                  |              |                          |              |
| plate 18 | F02 | hsa-miR-4710     | MIMAT0019815 | GGGUGAGGGCAGGUGGUU       | 3.809074023  |
| plate 18 | F03 | hsa-miR-6514-5p  | MIMAT0025484 | UAUGGAGUGGACUUUCAGCUGGC  | -21.67222745 |
| plate 18 | F04 | hsa-miR-3135a    | MIMAT0015001 | UGCCUAGGCUGAGACUGCAGUG   | 10.91022723  |
| plate 18 | F05 | hsa-miR-4746-5p  | MIMAT0019880 | CCGUUCCAGGAGAACCUGCAGA   | -5.064913392 |
| plate 18 | F06 | hsa-miR-548ai    | MIMAT0018989 | AAAGGUAAUUGCAGUUUUUCCC   | 25.18517468  |
| plate 18 | F07 | hsa-miR-3173-3p  | MIMAT0015048 | AAAGGAGGAAAUAGGCAGGCCA   | -1.739131383 |
| plate 18 | F08 | hsa-miR-3677-3p  | MIMAT0018101 | CUCGUGGGCUCUGGCCACGGCC   | 29.39442889  |
| plate 18 | F09 | hsa-miR-2278     | MIMAT0011778 | GAGAGCAGUGUGUGUUGCCUGG   | 36.9785469   |
| plate 18 | F10 | hsa-miR-4444     | MIMAT0018962 | CUCGAGUUGGAAGAGGCG       | 1.924333333  |
| plate 18 | F11 | hsa-miR-4739     | MIMAT0019868 | AAGGGAGGAGGAGCGGAGGGCCCU | 16.48199189  |
| plate 18 | F12 |                  |              |                          |              |
| plate 18 | G01 |                  |              |                          |              |
| plate 18 | G02 | hsa-miR-5091     | MIMAT0021083 | ACGGAGACGACAAGACUGUGCUG  | 64.36029523  |
| plate 18 | G03 | hsa-miR-6793-5p  | MIMAT0027486 | UGUGGGUUCUGGGUUGGGGUGA   | 41.16227857  |
| plate 18 | G04 | hsa-miR-6875-5p  | MIMAT0027650 | UGAGGGACCCAGGACAGGAGA    | 20.08459519  |
| plate 18 | G05 | hsa-miR-3121-3p  | MIMAT0014983 | UAAAUAGAGUAGGCAAAGGACA   | 36.37189599  |
| plate 18 | G06 | hsa-miR-3648     | MIMAT0018068 | AGCCGCGGGGAUCGCCGAGGG    | 50.81372152  |
| plate 18 | G07 | hsa-miR-6780a-5p | MIMAT0027460 | UUGGGAGGGAAGACAGCUGGAGA  | -11.2413657  |
| plate 18 | G08 | hsa-miR-210-5p   | MIMAT0026475 | AGCCCCUGCCCACCGCACACUG   | 35.19393305  |

|          |     |                  |              |                         |              |
|----------|-----|------------------|--------------|-------------------------|--------------|
| plate 18 | G09 | hsa-miR-6734-5p  | MIMAT0027369 | UUGAGGGGAGAAUGAGGUGGAGA | 15.58281352  |
| plate 18 | G10 | hsa-miR-4423-5p  | MIMAT0019232 | AGUUGCCUUUUUGUCCCAUGC   | 46.96963582  |
| plate 18 | G11 | hsa-miR-4745-5p  | MIMAT0019878 | UGAGUGGGGCUCCCGGGACGGCG | 23.26705838  |
| plate 18 | G12 |                  |              |                         |              |
| plate 18 | H01 |                  |              |                         |              |
| plate 18 | H02 |                  |              |                         |              |
| plate 18 | H03 |                  |              |                         |              |
| plate 18 | H04 |                  |              |                         |              |
| plate 18 | H05 |                  |              |                         |              |
| plate 18 | H06 |                  |              |                         |              |
| plate 18 | H07 |                  |              |                         |              |
| plate 18 | H08 |                  |              |                         |              |
| plate 18 | H09 |                  |              |                         |              |
| plate 18 | H10 |                  |              |                         |              |
| plate 18 | H11 |                  |              |                         |              |
| plate 18 | H12 |                  |              |                         |              |
| plate 19 | A01 |                  |              |                         |              |
| plate 19 | A02 |                  |              |                         |              |
| plate 19 | A03 |                  |              |                         |              |
| plate 19 | A04 |                  |              |                         |              |
| plate 19 | A05 |                  |              |                         |              |
| plate 19 | A06 |                  |              |                         |              |
| plate 19 | A07 |                  |              |                         |              |
| plate 19 | A08 |                  |              |                         |              |
| plate 19 | A09 |                  |              |                         |              |
| plate 19 | A10 |                  |              |                         |              |
| plate 19 | A11 |                  |              |                         |              |
| plate 19 | A12 |                  |              |                         |              |
| plate 19 | B01 |                  |              |                         |              |
| plate 19 | B02 |                  |              |                         |              |
| plate 19 | B03 |                  |              |                         |              |
| plate 19 | B04 | hsa-miR-3176     | MIMAT0015053 | ACUGGCCUGGGACUACCGG     | 11.99869243  |
| plate 19 | B05 | hsa-miR-3614-3p  | MIMAT0017993 | UAGCCUUCAGAUCUUGGUGUUUU | 54.05855163  |
| plate 19 | B06 | hsa-miR-4298     | MIMAT0016852 | CUGGGACAGGAGGAGGAGGCAG  | 29.07545758  |
| plate 19 | B07 | hsa-miR-4271     | MIMAT0016901 | GGGGGAAGAAAAGGUGGGG     | 45.44096028  |
| plate 19 | B08 | hsa-miR-6089     | MIMAT0023714 | GGAGGCCGGGUGGGGCGGGCGG  | 27.44601994  |
| plate 19 | B09 | hsa-miR-6877-5p  | MIMAT0027654 | AGGGCCGAAGGGUGGAAGCUGC  | 24.46680012  |
| plate 19 | B10 | hsa-miR-128-1-5p | MIMAT0026477 | CGGGGCCGUAGCACUGUCUGAGA | 39.67973432  |
| plate 19 | B11 | hsa-miR-412-5p   | MIMAT0026557 | UGGUCGACCAGUUGGAAAGUAAU | -25.16638782 |
| plate 19 | B12 |                  |              |                         |              |
| plate 19 | C01 |                  |              |                         |              |
| plate 19 | C02 | hsa-miR-500b-3p  | MIMAT0027032 | GCACCCAGGCAAGGAUUCUG    | -51.32468144 |
| plate 19 | C03 | hsa-miR-4478     | MIMAT0019006 | GAGGCUGAGCUGAGGAG       | 35.12765455  |
| plate 19 | C04 | hsa-miR-5585-5p  | MIMAT0022285 | UGAAGUACCAGCUACUCGAGAG  | -76.57611541 |
| plate 19 | C05 | hsa-miR-4651     | MIMAT0019715 | CGGGGUGGGUGAGGUCGGGC    | 27.87439392  |
| plate 19 | C06 | hsa-miR-605-3p   | MIMAT0026621 | AGAAGGCACUAUGAGAUUUAGA  | 29.35511305  |
| plate 19 | C07 | hsa-miR-3917     | MIMAT0018191 | GCUCGGACUGAGCAGGUGGG    | 40.21318117  |
| plate 19 | C08 | hsa-miR-1273h-5p | MIMAT0030415 | CUGGGAGGUCAAGGCUGCAGU   | 26.99824789  |
| plate 19 | C09 | hsa-miR-3918     | MIMAT0018192 | ACAGGGCCGCAGAUGGAGACU   | 29.79803559  |

|          |     |                 |              |                           |              |
|----------|-----|-----------------|--------------|---------------------------|--------------|
| plate 19 | C10 | hsa-miR-4486    | MIMAT0019020 | GCUGGGCGAGGCUGGCA         | 30.66286608  |
| plate 19 | C11 | hsa-miR-6826-5p | MIMAT0027552 | UCAAUAGGAAAGAGGUGGGACCU   | -56.59933921 |
| plate 19 | C12 |                 |              |                           |              |
| plate 19 | D01 |                 |              |                           |              |
| plate 19 | D02 | hsa-miR-7847-3p | MIMAT0030422 | CGUGGAGGACGAGGAGGAGGC     | -8.663482151 |
| plate 19 | D03 | hsa-miR-3153    | MIMAT0015026 | GGGGAAAGCGAGUAGGGACAUUU   | 16.00924282  |
| plate 19 | D04 | hsa-miR-3159    | MIMAT0015033 | UAGGAUUACAAGUGUCGGCCAC    | 33.04882835  |
| plate 19 | D05 | hsa-miR-4517    | MIMAT0019054 | AAAUUGAUGAAACUCACAGCUGAG  | 35.73061114  |
| plate 19 | D06 | hsa-miR-4724-5p | MIMAT0019841 | AACUGAACGAGGAGUGAGCUUCG   | -14.7399267  |
| plate 19 | D07 | hsa-miR-4800-5p | MIMAT0019978 | AGUGGACCGAGGAAGGAAGGA     | 29.6590161   |
| plate 19 | D08 | hsa-miR-3145-3p | MIMAT0015016 | AGAUUUUUUGAGUGUUUGGAAUUG  | 41.20086609  |
| plate 19 | D09 | hsa-miR-3610    | MIMAT0017987 | GAAUCGGAAAGGAGGCGCCG      | 39.70559841  |
| plate 19 | D10 | hsa-miR-3667-5p | MIMAT0018089 | AAAGACCCAUUGAGGAGAAGGU    | -3.788101262 |
| plate 19 | D11 | hsa-miR-4800-3p | MIMAT0019979 | CAUCCGUCCGUCUGUCCAC       | 23.23502285  |
| plate 19 | D12 |                 |              |                           |              |
| plate 19 | E01 |                 |              |                           |              |
| plate 19 | E02 | hsa-miR-1236-3p | MIMAT0005591 | CCUCUCCCCUUGUCUCUCCAG     | 9.55453596   |
| plate 19 | E03 | hsa-miR-3616-3p | MIMAT0017996 | CGAGGGCAUUUCAUGAUGCAGGC   | -35.23883421 |
| plate 19 | E04 | hsa-miR-627-3p  | MIMAT0026623 | UCUUUUUCUUUGAGACUCACU     | 21.53445896  |
| plate 19 | E05 | hsa-miR-3162-3p | MIMAT0019213 | UCCCUACCCUCCACUCCCA       | -13.28507166 |
| plate 19 | E06 | hsa-miR-4687-3p | MIMAT0019775 | UGGUGUUGGAGGGGGCAGGC      | 34.40669305  |
| plate 19 | E07 | hsa-miR-4487    | MIMAT0019021 | AGAGCUGGCUGAAGGGCAG       | 12.73743549  |
| plate 19 | E08 | hsa-miR-653-3p  | MIMAT0026625 | UUCACUGGAGUUUGUUCAAUA     | 25.85052891  |
| plate 19 | E09 | hsa-miR-3177-3p | MIMAT0015054 | UGCACGGCACUGGGGACACGU     | 17.93450099  |
| plate 19 | E10 | hsa-miR-4727-3p | MIMAT0019848 | AUAGUGGGAAGCUGGCAGAUUC    | 14.14379536  |
| plate 19 | E11 | hsa-miR-3620-5p | MIMAT0022967 | GUGGGCUGGGCUGGGCUGGGCC    | 18.93835097  |
| plate 19 | E12 |                 |              |                           |              |
| plate 19 | F01 |                 |              |                           |              |
| plate 19 | F02 | hsa-miR-5571-3p | MIMAT0022258 | GUCCUAGGAGGCUCCUCUG       | -2.01802763  |
| plate 19 | F03 | hsa-miR-942-3p  | MIMAT0026734 | CACAUGGCCGAAACAGAGAAGU    | -50.25293822 |
| plate 19 | F04 | hsa-miR-3157-5p | MIMAT0015031 | UUCAGCCAGGCUAGUGCAGUCU    | 17.39297161  |
| plate 19 | F05 | hsa-miR-4688    | MIMAT0019777 | UAGGGGCAGCAGAGGACCUGGG    | -2.171595662 |
| plate 19 | F06 | hsa-miR-4716-3p | MIMAT0019827 | AAGGGGAAGGAAACAUGGAGA     | -21.41286182 |
| plate 19 | F07 | hsa-miR-3154    | MIMAT0015028 | CAGAAGGGGAGUUGGGAGCAGA    | 38.88118055  |
| plate 19 | F08 | hsa-miR-4472    | MIMAT0018999 | GGUGGGGGUGUUGUUUU         | 24.88547507  |
| plate 19 | F09 | hsa-miR-4707-3p | MIMAT0019808 | AGCCC GCCCAGCCGAGGUUCU    | -4.368426772 |
| plate 19 | F10 | hsa-miR-219b-3p | MIMAT0019748 | AGAAUUGCGUUUGGACAAUCAGU   | -19.02689955 |
| plate 19 | F11 | hsa-miR-651-3p  | MIMAT0026624 | AAAGGAAAGUGUAUCCUAAAAG    | 23.93658628  |
| plate 19 | F12 |                 |              |                           |              |
| plate 19 | G01 |                 |              |                           |              |
| plate 19 | G02 | hsa-miR-3162-5p | MIMAT0015036 | UUAGGGAGUAGAAGGGUGGGGAG   | 17.42045221  |
| plate 19 | G03 | hsa-miR-6127    | MIMAT0024610 | UGAGGGAGUGGGUGGGAGG       | 2.192969458  |
| plate 19 | G04 | hsa-miR-433-5p  | MIMAT0026554 | UACGGUGAGCCUGUCAUUUUC     | 11.25186684  |
| plate 19 | G05 | hsa-miR-3133    | MIMAT0014998 | UAAAGAACUCUAAAAACCCAAU    | 23.2495714   |
| plate 19 | G06 | hsa-miR-4430    | MIMAT0018945 | AGGUGGAGUGAGCGGAG         | 26.83336432  |
| plate 19 | G07 | hsa-miR-4706    | MIMAT0019806 | AGCGGGGAGGAAGUGGGCGCUGCUU | 17.89732136  |
| plate 19 | G08 | hsa-miR-6752-3p | MIMAT0027405 | UCCUGCCCCCAUACUCCAG       | -42.15747818 |
| plate 19 | G09 | hsa-miR-381-5p  | MIMAT0022862 | AGCGAGGUUGCCCUUGUAUUAU    | 20.59041969  |
| plate 19 | G10 | hsa-miR-548ae   | MIMAT0018954 | CAAAAACUGCAAUUACUUUCA     | 8.595948139  |

|          |     |                  |              |                           |              |
|----------|-----|------------------|--------------|---------------------------|--------------|
| plate 19 | G11 | hsa-miR-3605-3p  | MIMAT0017982 | CCUCCGUGUUACCUGUCCUCUAG   | -19.80443874 |
| plate 19 | G12 |                  |              |                           |              |
| plate 19 | H01 |                  |              |                           |              |
| plate 19 | H02 |                  |              |                           |              |
| plate 19 | H03 |                  |              |                           |              |
| plate 19 | H04 |                  |              |                           |              |
| plate 19 | H05 |                  |              |                           |              |
| plate 19 | H06 |                  |              |                           |              |
| plate 19 | H07 |                  |              |                           |              |
| plate 19 | H08 |                  |              |                           |              |
| plate 19 | H09 |                  |              |                           |              |
| plate 19 | H10 |                  |              |                           |              |
| plate 19 | H11 |                  |              |                           |              |
| plate 19 | H12 |                  |              |                           |              |
| plate 20 | A01 |                  |              |                           |              |
| plate 20 | A02 |                  |              |                           |              |
| plate 20 | A03 |                  |              |                           |              |
| plate 20 | A04 |                  |              |                           |              |
| plate 20 | A05 |                  |              |                           |              |
| plate 20 | A06 |                  |              |                           |              |
| plate 20 | A07 |                  |              |                           |              |
| plate 20 | A08 |                  |              |                           |              |
| plate 20 | A09 |                  |              |                           |              |
| plate 20 | A10 |                  |              |                           |              |
| plate 20 | A11 |                  |              |                           |              |
| plate 20 | A12 |                  |              |                           |              |
| plate 20 | B01 |                  |              |                           |              |
| plate 20 | B02 |                  |              |                           |              |
| plate 20 | B03 |                  |              |                           |              |
| plate 20 | B04 | hsa-miR-3912-3p  | MIMAT0018186 | UAACGCAUAAUAUGGACAUGU     | 37.40250875  |
| plate 20 | B05 | hsa-miR-573      | MIMAT0003238 | CUGAAGUGAUGUGUAACUGAUCAG  | 28.66367087  |
| plate 20 | B06 | hsa-miR-6777-5p  | MIMAT0027454 | ACGGGGAGUCAGGCAGUGGUGGA   | 22.11894579  |
| plate 20 | B07 | hsa-miR-3149     | MIMAT0015022 | UUUGUAUGGAUAUGUGUGUGUAU   | 28.44336403  |
| plate 20 | B08 | hsa-miR-4491     | MIMAT0019026 | AAUGUGGACUGGUGUGACAAA     | -2.655722306 |
| plate 20 | B09 | hsa-miR-3183     | MIMAT0015063 | GCCUCUCUCGGAGUCGUCGGA     | 28.5830708   |
| plate 20 | B10 | hsa-miR-4419b    | MIMAT0019034 | GAGGCUGAAGGAAGAUGG        | -1.348210181 |
| plate 20 | B11 | hsa-miR-6499-5p  | MIMAT0025450 | UCGGGCGCAAGAGCACUGCAGU    | -22.16810188 |
| plate 20 | B12 |                  |              |                           |              |
| plate 20 | C01 |                  |              |                           |              |
| plate 20 | C02 | hsa-miR-3160-3p  | MIMAT0015034 | AGAGCUGAGACUAGAAAGCCCA    | -64.95957061 |
| plate 20 | C03 | hsa-miR-4662a-5p | MIMAT0019731 | UUAGCCAAUUGUCCAUCUUUAG    | 39.39243474  |
| plate 20 | C04 | hsa-miR-4742-3p  | MIMAT0019873 | UCUGUAUUCUCCUUUGCCUGCAG   | -87.14608115 |
| plate 20 | C05 | hsa-miR-5010-3p  | MIMAT0021044 | UUUUGUGUCUCCAUUCCCCAG     | -27.04888344 |
| plate 20 | C06 | hsa-miR-6884-5p  | MIMAT0027668 | AGAGGCUGAGAAGGUGAUGUUG    | -3.603220818 |
| plate 20 | C07 | hsa-miR-3174     | MIMAT0015051 | UAGUGAGUUAGAGAUGCAGAGCC   | -1.779868294 |
| plate 20 | C08 | hsa-miR-3188     | MIMAT0015070 | AGAGGCUUUGUGCGGAUACGGGG   | 14.26312637  |
| plate 20 | C09 | hsa-miR-6516-5p  | MIMAT0030417 | UUUGCAGUAACAGGUGUGAGCA    | -60.79702516 |
| plate 20 | C10 | hsa-miR-4723-5p  | MIMAT0019838 | UGGGGGAGCCAUGAGAUAAAGAGCA | -2.019877368 |
| plate 20 | C11 | hsa-miR-7706     | MIMAT0030021 | UGAAGCGCCUGUGCUCUGCCGAGA  | 24.81994344  |

|          |     |                  |              |                         |              |
|----------|-----|------------------|--------------|-------------------------|--------------|
| plate 20 | C12 |                  |              |                         |              |
| plate 20 | D01 |                  |              |                         |              |
| plate 20 | D02 | hsa-miR-3661     | MIMAT0018082 | UGACCUGGGACUCGGACAGCUG  | 9.176366868  |
| plate 20 | D03 | hsa-miR-3936     | MIMAT0018351 | UAAGGGGUGUAUGGCAGAUGCA  | -0.832369781 |
| plate 20 | D04 | hsa-miR-4422     | MIMAT0018935 | AAAAGCAUCAGGAAGUACCCA   | -36.26773948 |
| plate 20 | D05 | hsa-miR-4767     | MIMAT0019919 | CGCGGGCGCUCCUGGCCCGCC   | 52.87413852  |
| plate 20 | D06 | hsa-miR-5196-5p  | MIMAT0021128 | AGGGAAGGGGACGAGGGUUGGG  | 18.87524105  |
| plate 20 | D07 | hsa-miR-6125     | MIMAT0024598 | GCGGAAGGCGGAGCGGCGGA    | 11.68213325  |
| plate 20 | D08 | hsa-miR-8072     | MIMAT0030999 | GGCGGCGGGGAGGUAGGCAG    | 23.49093797  |
| plate 20 | D09 | hsa-miR-376b-5p  | MIMAT0022923 | CGUGGAUAUUCUUAUGUUU     | 31.87513558  |
| plate 20 | D10 | hsa-miR-4301     | MIMAT0016850 | UCCCACUACUACUUGUGA      | 8.71963318   |
| plate 20 | D11 | hsa-miR-4449     | MIMAT0018968 | CGUCCCGGGCUGCGCGAGGCA   | 22.5219461   |
| plate 20 | D12 |                  |              |                         |              |
| plate 20 | E01 |                  |              |                         |              |
| plate 20 | E02 | hsa-miR-4725-3p  | MIMAT0019844 | UGGGGAAGGCGUCAGUGUCGGG  | 18.40238735  |
| plate 20 | E03 | hsa-miR-6510-5p  | MIMAT0025476 | CAGCAGGGGAGAGAGAGGAGUC  | 28.46127515  |
| plate 20 | E04 | hsa-miR-676-3p   | MIMAT0018204 | CUGUCCUAAGGUUGUUGAGUU   | 30.35268995  |
| plate 20 | E05 | hsa-miR-3665     | MIMAT0018087 | AGCAGGUGCGGGGCGGCG      | 16.92830177  |
| plate 20 | E06 | hsa-miR-4689     | MIMAT0019778 | UUGAGGAGACAUGGUGGGGGCC  | 30.09476975  |
| plate 20 | E07 | hsa-miR-4785     | MIMAT0019949 | AGAGUCGGCGACGCCCCAGC    | 32.57008723  |
| plate 20 | E08 | hsa-miR-1273h-3p | MIMAT0030416 | CUGCAGACUCGACCUCCCAGGC  | -65.75661567 |
| plate 20 | E09 | hsa-miR-3621     | MIMAT0018002 | CGCGGGUCGGGGUCUGCAGG    | 35.75647636  |
| plate 20 | E10 | hsa-miR-3926     | MIMAT0018201 | UGGCCAAAAGCAGGCAGAGA    | 16.32648797  |
| plate 20 | E11 | hsa-miR-4512     | MIMAT0019049 | CAGGGCCUCACUGUAUCGCCCA  | 14.30969529  |
| plate 20 | E12 |                  |              |                         |              |
| plate 20 | F01 |                  |              |                         |              |
| plate 20 | F02 | hsa-miR-4708-3p  | MIMAT0019810 | AGCAAGGCGGCAUCUCUCUGAU  | -16.6837154  |
| plate 20 | F03 | hsa-miR-4781-3p  | MIMAT0019943 | AAUGUUGGAAUCCUCGCUAGAG  | 17.9940137   |
| plate 20 | F04 | hsa-miR-5684     | MIMAT0022473 | AACUCUAGCCUGAGCAACAG    | -77.84841616 |
| plate 20 | F05 | hsa-miR-6124     | MIMAT0024597 | GGGAAAAGGAAGGGGGAGGA    | -30.97321093 |
| plate 20 | F06 | hsa-miR-134-3p   | MIMAT0026481 | CCUGUGGGCCACCUAGUCACCAA | 22.78523964  |
| plate 20 | F07 | hsa-miR-4442     | MIMAT0018960 | GCCGGACAAGAGGGAGG       | 23.12017768  |
| plate 20 | F08 | hsa-miR-6740-5p  | MIMAT0027381 | AGUUUGGGAUGGAGAGAGGAGA  | 33.15578101  |
| plate 20 | F09 | hsa-miR-4477b    | MIMAT0019005 | AUUAAGGACAUUUGUGAUUGAU  | -6.923943393 |
| plate 20 | F10 | hsa-miR-3125     | MIMAT0014988 | UAGAGGAAGCUGUGGAGAGA    | -25.75032688 |
| plate 20 | F11 | hsa-miR-4772-3p  | MIMAT0019927 | CCUGCAACUUUGCCUGAUCAGA  | -65.31779311 |
| plate 20 | F12 |                  |              |                         |              |
| plate 20 | G01 |                  |              |                         |              |
| plate 20 | G02 | hsa-miR-548aq-3p | MIMAT0022264 | CAAAAACUGCAAUUACUUUUGC  | -23.73532532 |
| plate 20 | G03 | hsa-miR-2467-3p  | MIMAT0019953 | AGCAGAGGCAGAGAGGCUCAGG  | -35.44561884 |
| plate 20 | G04 | hsa-miR-3116     | MIMAT0014978 | UGCCUGGAACAUAGUAGGGACU  | -13.29313944 |
| plate 20 | G05 | hsa-miR-3911     | MIMAT0018185 | UGUGUGGAUCCUGGAGGAGGCA  | -24.84044173 |
| plate 20 | G06 | hsa-miR-4539     | MIMAT0019082 | GCUGAACUGGGCUGAGCUGGGC  | -29.25195182 |
| plate 20 | G07 | hsa-miR-4709-3p  | MIMAT0019812 | UUGAAGAGGAGGUGCUCUGUAGC | -77.06749111 |
| plate 20 | G08 | hsa-miR-4742-5p  | MIMAT0019872 | UCAGGCAAAGGGAUUUUACAGA  | -45.53495555 |
| plate 20 | G09 | hsa-miR-556-5p   | MIMAT0003220 | GAUGAGCUCAUUGUAAUAUGAG  | 32.63635839  |
| plate 20 | G10 | hsa-miR-585-5p   | MIMAT0026618 | CUAGCACACAGAUACGCCCAGA  | -39.90190674 |
| plate 20 | G11 | hsa-miR-653-5p   | MIMAT0003328 | GUGUUGAAACAAUCUCUACUG   | 9.015166743  |
| plate 20 | G12 |                  |              |                         |              |

|          |     |                 |              |                            |              |
|----------|-----|-----------------|--------------|----------------------------|--------------|
| plate 20 | H01 |                 |              |                            |              |
| plate 20 | H02 |                 |              |                            |              |
| plate 20 | H03 |                 |              |                            |              |
| plate 20 | H04 |                 |              |                            |              |
| plate 20 | H05 |                 |              |                            |              |
| plate 20 | H06 |                 |              |                            |              |
| plate 20 | H07 |                 |              |                            |              |
| plate 20 | H08 |                 |              |                            |              |
| plate 20 | H09 |                 |              |                            |              |
| plate 20 | H10 |                 |              |                            |              |
| plate 20 | H11 |                 |              |                            |              |
| plate 20 | H12 |                 |              |                            |              |
| plate 21 | A01 |                 |              |                            |              |
| plate 21 | A02 |                 |              |                            |              |
| plate 21 | A03 |                 |              |                            |              |
| plate 21 | A04 |                 |              |                            |              |
| plate 21 | A05 |                 |              |                            |              |
| plate 21 | A06 |                 |              |                            |              |
| plate 21 | A07 |                 |              |                            |              |
| plate 21 | A08 |                 |              |                            |              |
| plate 21 | A09 |                 |              |                            |              |
| plate 21 | A10 |                 |              |                            |              |
| plate 21 | A11 |                 |              |                            |              |
| plate 21 | A12 |                 |              |                            |              |
| plate 21 | B01 |                 |              |                            |              |
| plate 21 | B02 |                 |              |                            |              |
| plate 21 | B03 |                 |              |                            |              |
| plate 21 | B04 | hsa-miR-5701    | MIMAT0022494 | UUAUUGUCACGUUCUGAUU        | 6.519877104  |
| plate 21 | B05 | hsa-miR-1281    | MIMAT0005939 | UCGCCUCCUCCUCUCCC          | -11.11562601 |
| plate 21 | B06 | hsa-miR-3607-3p | MIMAT0017985 | ACUGUAAACGCUUUCUGAUG       | 25.02623678  |
| plate 21 | B07 | hsa-miR-4677-3p | MIMAT0019761 | UCUGUGAGACCAAAGAACUACU     | -33.63292475 |
| plate 21 | B08 | hsa-miR-6789-5p | MIMAT0027478 | GUAGGGGCGUCCCGGGCGCGCGGG   | 9.121922842  |
| plate 21 | B09 | hsa-miR-3128    | MIMAT0014991 | UCUGGCAAGUAAAAAACUCUCAU    | -0.041803454 |
| plate 21 | B10 | hsa-miR-4536-5p | MIMAT0019078 | UGUGGUAGAUUAUUGCACGAU      | 10.23746116  |
| plate 21 | B11 | hsa-miR-4646-5p | MIMAT0019707 | ACUGGGAAGAGGAGCUGAGGGA     | -32.88046259 |
| plate 21 | B12 |                 |              |                            |              |
| plate 21 | C01 |                 |              |                            |              |
| plate 21 | C02 | hsa-miR-4732-5p | MIMAT0019855 | UGUAGAGCAGGGAGCAGGAAGCU    | -36.95586081 |
| plate 21 | C03 | hsa-miR-6512-5p | MIMAT0025480 | UACCAUUAGAAGAGCUGGAAGA     | 2.13928443   |
| plate 21 | C04 | hsa-miR-626     | MIMAT0003295 | AGCUGUCUGAAAAUGUCUU        | 5.224116208  |
| plate 21 | C05 | hsa-miR-1909-3p | MIMAT0007883 | CGCAGGGGCCGGGUGCUCACCG     | -43.40046247 |
| plate 21 | C06 | hsa-miR-4518    | MIMAT0019055 | GCUCAGGGAUGAUAACUGUGCUGAGA | -36.06658735 |
| plate 21 | C07 | hsa-miR-6516-3p | MIMAT0030418 | AUCAUGUAUGAUACUGCAAACA     | 2.106397098  |
| plate 21 | C08 | hsa-miR-219b-5p | MIMAT0019747 | AGAUGUCCAGCCACAAUUCUCG     | -6.132537411 |
| plate 21 | C09 | hsa-miR-511-3p  | MIMAT0026606 | AAUGUGUAGCAAAGACAGA        | 11.13331209  |
| plate 21 | C10 | hsa-miR-548aw   | MIMAT0022471 | GUGCAAAAGUCAUCACGGUU       | 19.16045218  |
| plate 21 | C11 | hsa-miR-1287-3p | MIMAT0026738 | CUCUAGCCACAGAUGCAGUGAU     | -47.60872552 |
| plate 21 | C12 |                 |              |                            |              |
| plate 21 | D01 |                 |              |                            |              |

|          |     |                   |              |                         |              |
|----------|-----|-------------------|--------------|-------------------------|--------------|
| plate 21 | D02 | hsa-miR-3134      | MIMAT0015000 | UGAUGGAUAAAAGACUACAUUU  | -1.4257024   |
| plate 21 | D03 | hsa-miR-3915      | MIMAT0018189 | UUGAGGAAAAGAUGGUCUUAUU  | 6.679051792  |
| plate 21 | D04 | hsa-miR-4691-3p   | MIMAT0019782 | CCAGCCACGGACUGAGAGUGCAU | 7.69198163   |
| plate 21 | D05 | hsa-miR-6513-5p   | MIMAT0025482 | UUUGGGAUUGACGCCACAUGUCU | -49.93977964 |
| plate 21 | D06 | hsa-miR-548ax     | MIMAT0022474 | AGAAGUAAUUGCGGUUUUGCCA  | -2.109758914 |
| plate 21 | D07 | hsa-miR-550b-2-5p | MIMAT0022737 | AUGUGCCUGAGGGAGUAAGACA  | -31.16505933 |
| plate 21 | D08 | hsa-miR-2392      | MIMAT0019043 | UAGGAUGGGGGUGAGAGGUG    | 4.321687807  |
| plate 21 | D09 | hsa-miR-3064-5p   | MIMAT0019864 | UCUGGCUGUUGUGGUGUGCAA   | 0.808005215  |
| plate 21 | D10 | hsa-miR-4636      | MIMAT0019693 | AACUCGUGUCAAAGCCUUUAG   | 2.620754976  |
| plate 21 | D11 | hsa-miR-4738-3p   | MIMAT0019867 | UGAAACUGGAGCGCCUGGAGGA  | 6.243623512  |
| plate 21 | D12 |                   |              |                         |              |
| plate 21 | E01 |                   |              |                         |              |
| plate 21 | E02 | hsa-miR-5188      | MIMAT0021119 | AAUCGGACCCAUUUAAACCGGAG | 7.322328014  |
| plate 21 | E03 | hsa-miR-6880-5p   | MIMAT0027660 | UGGUGGAGGAAGAGGGCAGCUC  | -15.57383279 |
| plate 21 | E04 | hsa-miR-5193      | MIMAT0021124 | UCCUCCUCUACCUCAUCCCAGU  | -6.022035974 |
| plate 21 | E05 | hsa-miR-3688-3p   | MIMAT0018116 | UAUGGAAAGACUUUGCCACUCU  | -57.40520409 |
| plate 21 | E06 | hsa-miR-5001-3p   | MIMAT0021022 | UUCUGCCUCUGUCCAGGUCCUU  | -14.70297623 |
| plate 21 | E07 | hsa-miR-548al     | MIMAT0019024 | AACGGCAAUGACUUUUGUACCA  | -61.23986705 |
| plate 21 | E08 | hsa-miR-1296-3p   | MIMAT0026637 | GAGUGGGGCUUCGACCCUAACC  | 9.815187809  |
| plate 21 | E09 | hsa-miR-4657      | MIMAT0019724 | AAUGUGGAAGUGGUCUGAGGCAU | 3.700774972  |
| plate 21 | E10 | hsa-miR-4668-5p   | MIMAT0019745 | AGGGAAAAAAAAAAGGAUUUGUC | -1.494108052 |
| plate 21 | E11 | hsa-miR-597-3p    | MIMAT0026619 | UGGUUCUCUUGUGGCUCAAGCGU | -18.02591229 |
| plate 21 | E12 |                   |              |                         |              |
| plate 21 | F01 |                   |              |                         |              |
| plate 21 | F02 | hsa-miR-548v      | MIMAT0015020 | AGCUACAGUUACUUUJGCACCA  | -6.423261429 |
| plate 21 | F03 | hsa-miR-4644      | MIMAT0019704 | UGGAGAGAGAAAAGAGACAGAAG | -32.13457789 |
| plate 21 | F04 | hsa-miR-4707-5p   | MIMAT0019807 | GCCCCGGCGCGGGCGGUUCUGG  | 7.035550475  |
| plate 21 | F05 | hsa-miR-5582-3p   | MIMAT0022280 | UAAAACUUUAAGUGUGCCUAGG  | 12.49879413  |
| plate 21 | F06 | hsa-miR-95-5p     | MIMAT0026473 | UCAAUAAAUGUCUGUUGAAUU   | 18.71581545  |
| plate 21 | F07 | hsa-miR-3139      | MIMAT0015007 | UAGGAGCUCAACAGAUGCCUGUU | -47.44691985 |
| plate 21 | F08 | hsa-miR-3156-5p   | MIMAT0015030 | AAAGAUCUGGAAGUGGGAGACA  | -18.26796306 |
| plate 21 | F09 | hsa-miR-4496      | MIMAT0019031 | GAGGAAACUGAAGCUGAGAGGG  | -4.831514542 |
| plate 21 | F10 | hsa-miR-4748      | MIMAT0019884 | GAGGUUUGGGGAGGAUUUGCU   | -6.29565858  |
| plate 21 | F11 | hsa-miR-6501-3p   | MIMAT0025459 | CCAGAGCAGCCUGCGUAACAGU  | 6.490936251  |
| plate 21 | F12 |                   |              |                         |              |
| plate 21 | G01 |                   |              |                         |              |
| plate 21 | G02 | hsa-miR-6507-5p   | MIMAT0025470 | GAAGAAUAGGAGGGACUUUGU   | -2.382066026 |
| plate 21 | G03 | hsa-miR-4431      | MIMAT0018947 | GCGACUCUGAAAACUAGAAGGU  | -31.41631855 |
| plate 21 | G04 | hsa-miR-4464      | MIMAT0018988 | AAGGUUUGGAUAGAUGCAAUA   | 6.127860102  |
| plate 21 | G05 | hsa-miR-181d-3p   | MIMAT0026608 | CCACCGGGGAUGAAUGUCAC    | -14.945027   |
| plate 21 | G06 | hsa-miR-548az-5p  | MIMAT0025456 | CAAAGUGAUUGUGGUUUUUGC   | 10.6400021   |
| plate 21 | G07 | hsa-miR-3173-5p   | MIMAT0019214 | UGCCUGCCUGUUUUCUCCUUU   | -26.70685255 |
| plate 21 | G08 | hsa-miR-4640-5p   | MIMAT0019699 | UGGGCCAGGGAGCAGCUGGUGGG | 8.740429786  |
| plate 21 | G09 | hsa-miR-6859-5p   | MIMAT0027618 | GAGAGGAACAUGGGCUCAGGACA | -52.19190416 |
| plate 21 | G10 | hsa-miR-7110-5p   | MIMAT0028117 | UGGGGGUGUGGGGAGAGAGAG   | 5.962107946  |
| plate 21 | G11 | hsa-miR-6837-5p   | MIMAT0027576 | ACCAGGGCCAGCAGGGAAUGU   | -34.69978981 |
| plate 21 | G12 |                   |              |                         |              |
| plate 21 | H01 |                   |              |                         |              |
| plate 21 | H02 |                   |              |                         |              |

|          |     |                  |              |                          |              |
|----------|-----|------------------|--------------|--------------------------|--------------|
| plate 21 | H03 |                  |              |                          |              |
| plate 21 | H04 |                  |              |                          |              |
| plate 21 | H05 |                  |              |                          |              |
| plate 21 | H06 |                  |              |                          |              |
| plate 21 | H07 |                  |              |                          |              |
| plate 21 | H08 |                  |              |                          |              |
| plate 21 | H09 |                  |              |                          |              |
| plate 21 | H10 |                  |              |                          |              |
| plate 21 | H11 |                  |              |                          |              |
| plate 21 | H12 |                  |              |                          |              |
| plate 22 | A01 |                  |              |                          |              |
| plate 22 | A02 |                  |              |                          |              |
| plate 22 | A03 |                  |              |                          |              |
| plate 22 | A04 |                  |              |                          |              |
| plate 22 | A05 |                  |              |                          |              |
| plate 22 | A06 |                  |              |                          |              |
| plate 22 | A07 |                  |              |                          |              |
| plate 22 | A08 |                  |              |                          |              |
| plate 22 | A09 |                  |              |                          |              |
| plate 22 | A10 |                  |              |                          |              |
| plate 22 | A11 |                  |              |                          |              |
| plate 22 | A12 |                  |              |                          |              |
| plate 22 | B01 |                  |              |                          |              |
| plate 22 | B02 |                  |              |                          |              |
| plate 22 | B03 |                  |              |                          |              |
| plate 22 | B04 | hsa-miR-5009-5p  | MIMAT0021041 | UUGGACUUUUUCAGAUUUGGGGAU | 9.059137047  |
| plate 22 | B05 | hsa-miR-1208     | MIMAT0005873 | UCACUGUUCAGACAGGCGGA     | 9.4077492    |
| plate 22 | B06 | hsa-miR-3074-5p  | MIMAT0019208 | GUUCCUGCUGAACUGAGCCAG    | -66.53084375 |
| plate 22 | B07 | hsa-miR-4436b-3p | MIMAT0019941 | CAGGGCAGGAAGAAGUGGACAA   | -60.86476439 |
| plate 22 | B08 | hsa-miR-5588-5p  | MIMAT0022295 | ACUGGCAUUAGUGGGACUUUU    | 6.059714294  |
| plate 22 | B09 | hsa-miR-5787     | MIMAT0023252 | GGGCUGGGGCGCGGGGAGGU     | 7.506228361  |
| plate 22 | B10 | hsa-miR-2116-5p  | MIMAT0011160 | GGUUCUJAGCAUAGGAGGUCU    | 8.893885831  |
| plate 22 | B11 | hsa-miR-2681-3p  | MIMAT0013516 | UAUCAUGGAGUUGGUAAAGCAC   | -3.681052577 |
| plate 22 | B12 |                  |              |                          |              |
| plate 22 | C01 |                  |              |                          |              |
| plate 22 | C02 | hsa-miR-3150a-3p | MIMAT0015023 | CUGGGGAGAUCCUCGAGGUUGG   | -27.06070404 |
| plate 22 | C03 | hsa-miR-4632-3p  | MIMAT0019688 | UGCCGCCUCUCGCUCUCUAG     | 0.479656116  |
| plate 22 | C04 | hsa-miR-4766-5p  | MIMAT0019917 | UCUGAAAGAGCAGUUGGUGUU    | -13.99680313 |
| plate 22 | C05 | hsa-miR-548ac    | MIMAT0018938 | CAAAAACCGGCAAUUACUUUUG   | 4.038216544  |
| plate 22 | C06 | hsa-miR-6785-5p  | MIMAT0027470 | UGGGAGGGCGUGGAUGAUGGUG   | 4.586035643  |
| plate 22 | C07 | hsa-miR-6850-5p  | MIMAT0027600 | GUGCGGAACGCUGGCCGGGGCG   | -0.584290067 |
| plate 22 | C08 | hsa-miR-376c-5p  | MIMAT0022861 | GGUGGAUJUUCUUCUAUGUU     | 12.52488515  |
| plate 22 | C09 | hsa-miR-548j-3p  | MIMAT0026737 | CAAAAACUGCAUUACUUUUGC    | 14.64145894  |
| plate 22 | C10 | hsa-miR-3115     | MIMAT0014977 | AUAUGGGUUUACUAGUUGGU     | 3.816372447  |
| plate 22 | C11 | hsa-miR-4747-5p  | MIMAT0019882 | AGGGAAGGAGGCUUGGUCUAG    | -21.36066895 |
| plate 22 | C12 |                  |              |                          |              |
| plate 22 | D01 |                  |              |                          |              |
| plate 22 | D02 | hsa-miR-6747-5p  | MIMAT0027394 | AGGGGUGUGGAAAGAGGCAGAACA | 8.420769336  |
| plate 22 | D03 | hsa-miR-3660     | MIMAT0018081 | ACUGACAGGAGAGCAUUUUGA    | -29.54173599 |

|          |     |                  |              |                          |              |
|----------|-----|------------------|--------------|--------------------------|--------------|
| plate 22 | D04 | hsa-miR-4526     | MIMAT0019065 | GCUGACAGCAGGGCUGGCCGCU   | -40.74939037 |
| plate 22 | D05 | hsa-miR-4489     | MIMAT0019023 | UGGGGCUAGUGAUGCAGGACG    | 20.01325531  |
| plate 22 | D06 | hsa-miR-548an    | MIMAT0019079 | AAAAGGCAUUGUGUUUUUG      | 23.27753275  |
| plate 22 | D07 | hsa-miR-4507     | MIMAT0019044 | CUGGGUUGGGCUGGGCUGGG     | 11.29116032  |
| plate 22 | D08 | hsa-miR-943      | MIMAT0004986 | CUGACUGUUGCCGUCCUCCAG    | 2.702624526  |
| plate 22 | D09 | hsa-miR-6779-5p  | MIMAT0027458 | CUGGGAGGGCUGGGUUUGGC     | 9.04329104   |
| plate 22 | D10 | hsa-miR-6806-3p  | MIMAT0027513 | UGAAGCUCUGACAUUCCUGCAG   | -42.04876294 |
| plate 22 | D11 | hsa-miR-3132     | MIMAT0014997 | UGGGUAGAGAAGGAGCUCAGAGGA | 8.373231315  |
| plate 22 | D12 |                  |              |                          |              |
| plate 22 | E01 |                  |              |                          |              |
| plate 22 | E02 | hsa-miR-4669     | MIMAT0019749 | UGUGUCCGGAAGUGGAGGAGG    | 4.778451443  |
| plate 22 | E03 | hsa-miR-4787-3p  | MIMAT0019957 | GAUGC GCCCCACUGCCCCGCGC  | 1.849203864  |
| plate 22 | E04 | hsa-miR-526b-3p  | MIMAT0002836 | GAAAGUGCUUCCUUUAGAGGC    | 32.39577792  |
| plate 22 | E05 | hsa-miR-758-5p   | MIMAT0022929 | GAUGGUUGACCAGAGACACAC    | 18.36074315  |
| plate 22 | E06 | hsa-miR-4511     | MIMAT0019048 | GAAGAACUGUUGCAUUUGCCCU   | -19.84397971 |
| plate 22 | E07 | hsa-miR-6813-5p  | MIMAT0027526 | CAGGGCUGGGGUUCAGGUUCU    | 6.38342558   |
| plate 22 | E08 | hsa-miR-4437     | MIMAT0018953 | UGGGCUCAGGGUACAAAGGUU    | 11.49715841  |
| plate 22 | E09 | hsa-miR-939-3p   | MIMAT0022939 | CCUGGGCCUCUGCUCCCAG      | -52.22416315 |
| plate 22 | E10 | hsa-miR-1237-5p  | MIMAT0022946 | CGGGGGCGGGGCCGAAGCGCG    | 20.1739791   |
| plate 22 | E11 | hsa-miR-4536-3p  | MIMAT0020959 | UCGUGCAUAUAUCUACCACAU    | 0.411744658  |
| plate 22 | E12 |                  |              |                          |              |
| plate 22 | F01 |                  |              |                          |              |
| plate 22 | F02 | hsa-miR-4763-3p  | MIMAT0019913 | AGGCAGGGGCUGGUGCUGGGCGGG | -0.921583645 |
| plate 22 | F03 | hsa-miR-4789-3p  | MIMAT0019960 | CACACAUAGCAGGUGUAUAUA    | 6.768257178  |
| plate 22 | F04 | hsa-miR-518d-5p  | MIMAT0005456 | CUCUAGAGGGAAGCACUUUCUG   | -61.89022742 |
| plate 22 | F05 | hsa-miR-662      | MIMAT0003325 | UCCCACGUUGUGGCCAGCAG     | -70.30672084 |
| plate 22 | F06 | hsa-miR-323b-5p  | MIMAT0001630 | AGGUUGUCCGUGGUGAGUUCGCA  | -2.164363336 |
| plate 22 | F07 | hsa-miR-3186-3p  | MIMAT0015068 | UCACGCGGAGAGAUGGCUUUG    | -1.007604826 |
| plate 22 | F08 | hsa-miR-4470     | MIMAT0018997 | UGGCAAACGUGGAAGCCGAGA    | -7.47730311  |
| plate 22 | F09 | hsa-miR-4654     | MIMAT0019720 | UGUGGGAUCUGGAGGCAUCUGG   | -39.63337873 |
| plate 22 | F10 | hsa-miR-4685-3p  | MIMAT0019772 | UCUCCUUCUGCCCUGGCUAG     | -23.09241115 |
| plate 22 | F11 | hsa-miR-5006-3p  | MIMAT0021034 | UUUCCUUCUCCAUCCUGGCAG    | -62.38598106 |
| plate 22 | F12 |                  |              |                          |              |
| plate 22 | G01 |                  |              |                          |              |
| plate 22 | G02 | hsa-miR-5581-3p  | MIMAT0022276 | UUCCAUGCCUCCUAGAAGUUC    | -0.620509512 |
| plate 22 | G03 | hsa-miR-1233-5p  | MIMAT0022943 | AGUGGGAGGCCAGGGCACGGCA   | 7.900114821  |
| plate 22 | G04 | hsa-miR-4796-3p  | MIMAT0019971 | UAAAGUGGCAGAGUAUAGACAC   | -24.85810907 |
| plate 22 | G05 | hsa-miR-3181     | MIMAT0015061 | AUCGGGCCUCGGCGCCGG       | 26.72743485  |
| plate 22 | G06 | hsa-miR-6820-5p  | MIMAT0027540 | UGCGGCAGAGCUGGGGUCA      | 26.07774856  |
| plate 22 | G07 | hsa-miR-548ar-3p | MIMAT0022266 | UAAAACUGCAGUUAUUUUUGC    | 6.777312039  |
| plate 22 | G08 | hsa-miR-4687-5p  | MIMAT0019774 | CAGCCUCCUCCGCACCCAAA     | -33.48060059 |
| plate 22 | G09 | hsa-miR-6501-5p  | MIMAT0025458 | AGUUGCCAGGGCUGCCUUUGGU   | -52.28301975 |
| plate 22 | G10 | hsa-miR-5189-5p  | MIMAT0021120 | UCUGGGCACAGGCGGAUGGACAGG | -59.06963817 |
| plate 22 | G11 | hsa-miR-5706     | MIMAT0022500 | UUCUGGAUAACAUGCUGAAGCU   | -36.33967299 |
| plate 22 | G12 |                  |              |                          |              |
| plate 22 | H01 |                  |              |                          |              |
| plate 22 | H02 |                  |              |                          |              |
| plate 22 | H03 |                  |              |                          |              |
| plate 22 | H04 |                  |              |                          |              |

|          |     |                  |              |                         |              |
|----------|-----|------------------|--------------|-------------------------|--------------|
| plate 22 | H05 |                  |              |                         |              |
| plate 22 | H06 |                  |              |                         |              |
| plate 22 | H07 |                  |              |                         |              |
| plate 22 | H08 |                  |              |                         |              |
| plate 22 | H09 |                  |              |                         |              |
| plate 22 | H10 |                  |              |                         |              |
| plate 22 | H11 |                  |              |                         |              |
| plate 22 | H12 |                  |              |                         |              |
| plate 23 | A01 |                  |              |                         |              |
| plate 23 | A02 |                  |              |                         |              |
| plate 23 | A03 |                  |              |                         |              |
| plate 23 | A04 |                  |              |                         |              |
| plate 23 | A05 |                  |              |                         |              |
| plate 23 | A06 |                  |              |                         |              |
| plate 23 | A07 |                  |              |                         |              |
| plate 23 | A08 |                  |              |                         |              |
| plate 23 | A09 |                  |              |                         |              |
| plate 23 | A10 |                  |              |                         |              |
| plate 23 | A11 |                  |              |                         |              |
| plate 23 | A12 |                  |              |                         |              |
| plate 23 | B01 |                  |              |                         |              |
| plate 23 | B02 |                  |              |                         |              |
| plate 23 | B03 |                  |              |                         |              |
| plate 23 | B04 | hsa-miR-328-5p   | MIMAT0026486 | GGGGGGGCAGGAGGGGCUCAGGG | 3.681565555  |
| plate 23 | B05 | hsa-miR-374c-3p  | MIMAT0022735 | CACUUAGCAGGUUGUUAUUAU   | 20.17274193  |
| plate 23 | B06 | hsa-miR-3651     | MIMAT0018071 | CAUAGCCCGUCGUGGUACAUGA  | 17.92799906  |
| plate 23 | B07 | hsa-miR-4665-5p  | MIMAT0019739 | CUGGGGGACGCGUGAGCGCGAGC | 23.69353056  |
| plate 23 | B08 | hsa-miR-4728-5p  | MIMAT0019849 | UGGGAGGGGAGAGGCAGCAAGCA | 12.99258335  |
| plate 23 | B09 | hsa-miR-4772-5p  | MIMAT0019926 | UGAUCAGGCAAAAUUGCAGACU  | -14.91851655 |
| plate 23 | B10 | hsa-miR-4446-3p  | MIMAT0018965 | CAGGGCUGGCAGUGACAUGGGU  | 26.11664542  |
| plate 23 | B11 | hsa-miR-4476     | MIMAT0019003 | CAGGAAGGAUUUAGGGACAGGC  | 16.19367449  |
| plate 23 | B12 |                  |              |                         |              |
| plate 23 | C01 |                  |              |                         |              |
| plate 23 | C02 | hsa-miR-6131     | MIMAT0024615 | GGCUGGUCAGAUGGGAGUG     | 3.423612218  |
| plate 23 | C03 | hsa-miR-6842-3p  | MIMAT0027587 | UUGGCUUGUCUCUGCUCCGAG   | -39.97017628 |
| plate 23 | C04 | hsa-miR-3146     | MIMAT0015018 | CAUGCUGGUAUAGAAAGAAUGG  | -3.542499974 |
| plate 23 | C05 | hsa-miR-4498     | MIMAT0019033 | UGGGCUGGCAGGGCAAGUGCUG  | 17.25704596  |
| plate 23 | C06 | hsa-miR-6862-5p  | MIMAT0027625 | CGGGCAUGCUGGGAGAGACUUU  | 13.93932698  |
| plate 23 | C07 | hsa-miR-503-3p   | MIMAT0022925 | GGGGUAUUGUUUCCGUGCCAGG  | 26.21543606  |
| plate 23 | C08 | hsa-miR-3622a-3p | MIMAT0018004 | UCACCUGACCUCCAUGCCUGU   | -3.892383489 |
| plate 23 | C09 | hsa-miR-3940-5p  | MIMAT0019229 | GUGGGUUGGGGCGGGCUCUG    | 18.85278921  |
| plate 23 | C10 | hsa-miR-4633-3p  | MIMAT0019690 | AGGAGCUAGCCAGGCAUAUGCA  | -12.41307616 |
| plate 23 | C11 | hsa-miR-4634     | MIMAT0019691 | CGGCGCGACCGGCCCGGGG     | 50.09807321  |
| plate 23 | C12 |                  |              |                         |              |
| plate 23 | D01 |                  |              |                         |              |
| plate 23 | D02 | hsa-miR-5703     | MIMAT0022496 | AGGAGAAGUCGGGAAGGU      | 9.934189794  |
| plate 23 | D03 | hsa-miR-6513-3p  | MIMAT0025483 | UCAAGUGUCAUCUGUCCCUAG   | 15.69697711  |
| plate 23 | D04 | hsa-miR-3682-3p  | MIMAT0018110 | UGAUGAUACAGGUGGAGGUAG   | -11.16584434 |
| plate 23 | D05 | hsa-miR-4515     | MIMAT0019052 | AGGACUGGACUCCCGCAGCCC   | -9.987217123 |

|          |     |                  |              |                           |              |
|----------|-----|------------------|--------------|---------------------------|--------------|
| plate 23 | D06 | hsa-miR-6775-5p  | MIMAT0027450 | UCGGGGCAUGGGGGAGGGAGGCUGG | 11.20749137  |
| plate 23 | D07 | hsa-miR-1538     | MIMAT0007400 | CGGCCCGGGCUGCUGCUGUUCU    | 22.2926244   |
| plate 23 | D08 | hsa-miR-6090     | MIMAT0023715 | GGGGAGCGAGGGGCGGGGC       | 25.65973871  |
| plate 23 | D09 | hsa-miR-7110-3p  | MIMAT0028118 | UCUCUCUCCCACUUCCCUGCAG    | -22.41425634 |
| plate 23 | D10 | hsa-miR-937-3p   | MIMAT0004980 | AUCCGCGCUCUGACUCUCUGCC    | 8.636190555  |
| plate 23 | D11 | hsa-miR-3194-5p  | MIMAT0015078 | GGCCAGCCACCAGGAGGGCUG     | 9.021748469  |
| plate 23 | D12 |                  |              |                           |              |
| plate 23 | E01 |                  |              |                           |              |
| plate 23 | E02 | hsa-miR-6511b-5p | MIMAT0025847 | CUGCAGGCAGAAGUGGGGCUGACA  | 15.03288448  |
| plate 23 | E03 | hsa-miR-7845-5p  | MIMAT0030420 | AAGGGACAGGGAGGGUCGUGG     | 8.201237322  |
| plate 23 | E04 | hsa-miR-541-5p   | MIMAT0004919 | AAAGGAUUCUGCUGUCGGUCCCACU | 13.05158331  |
| plate 23 | E05 | hsa-miR-2114-5p  | MIMAT0011156 | UAGUCCCUUCCUUGAAGCGGUC    | 15.19753554  |
| plate 23 | E06 | hsa-miR-3622b-3p | MIMAT0018006 | UCACCUAGAGCUCCGUGCCUG     | -35.67552763 |
| plate 23 | E07 | hsa-miR-3652     | MIMAT0018072 | CGGCUUGAGGUGUGAGGA        | 13.62923414  |
| plate 23 | E08 | hsa-miR-6729-5p  | MIMAT0027359 | UGGGCGAGGGCGGCUGAGCGGC    | 6.118401335  |
| plate 23 | E09 | hsa-miR-6894-5p  | MIMAT0027688 | AGGAGGAUGGAGAGCUGGGCCAGA  | -4.527662186 |
| plate 23 | E10 | hsa-miR-7846-3p  | MIMAT0030421 | CAGCGGAGCCUGGAGAGAAGG     | 13.41793194  |
| plate 23 | E11 | hsa-miR-875-3p   | MIMAT0004923 | CCUGGAAACACUGAGGUUGUG     | 11.21846811  |
| plate 23 | E12 |                  |              |                           |              |
| plate 23 | F01 |                  |              |                           |              |
| plate 23 | F02 | hsa-miR-3158-5p  | MIMAT0019211 | CCUGCAGAGAGGAAGCCCUUC     | -55.53930668 |
| plate 23 | F03 | hsa-miR-4463     | MIMAT0018987 | GAGACUGGGGUGGGGCC         | 9.304399466  |
| plate 23 | F04 | hsa-miR-4775     | MIMAT0019931 | UUAAUUUUUUGUUUCGGUCACU    | 12.14051408  |
| plate 23 | F05 | hsa-miR-5689     | MIMAT0022481 | AGCAUACACCUUGUAGUCCUAGA   | -16.08342285 |
| plate 23 | F06 | hsa-miR-1180-5p  | MIMAT0026735 | GGACCCACCCGGCCGGGAAUA     | 16.13193034  |
| plate 23 | F07 | hsa-miR-4426     | MIMAT0018941 | GAAGAUGGACGUACUUU         | 17.6563248   |
| plate 23 | F08 | hsa-miR-4645-3p  | MIMAT0019706 | AGACAGUAGUUCUUGCCUGGUU    | 7.561842349  |
| plate 23 | F09 | hsa-miR-1322     | MIMAT0005953 | GAUGAUGCUGCUGAUGCUG       | 15.34023313  |
| plate 23 | F10 | hsa-miR-4436a    | MIMAT0018952 | GCAGGACAGGCAGAAGUGGAU     | -6.39782388  |
| plate 23 | F11 | hsa-miR-3619-5p  | MIMAT0017999 | UCAGCAGGCAGGCUGGUGCAGC    | 14.9574194   |
| plate 23 | F12 |                  |              |                           |              |
| plate 23 | G01 |                  |              |                           |              |
| plate 23 | G02 | hsa-miR-4786-5p  | MIMAT0019954 | UGAGACCAGGACUGGAUGCACC    | -24.60685971 |
| plate 23 | G03 | hsa-miR-6761-5p  | MIMAT0027422 | UCUGAGAGAGCUCGAUGGCAG     | -9.44112442  |
| plate 23 | G04 | hsa-miR-3118     | MIMAT0014980 | UGUGACUGCAUUAUGAAAUUCU    | -10.33298436 |
| plate 23 | G05 | hsa-miR-548as-5p | MIMAT0022267 | AAAAGUAAUUGCGGUUUUGCC     | 16.74662766  |
| plate 23 | G06 | hsa-miR-3913-3p  | MIMAT0019225 | AGACAUCAAGAUCAGUCCCAA     | -4.438476192 |
| plate 23 | G07 | hsa-miR-4420     | MIMAT0018933 | GUCACUGAUGUCUGUAGCUGAG    | 1.800427124  |
| plate 23 | G08 | hsa-miR-3165     | MIMAT0015039 | AGGUGGAUGCAAUGUGACCUCA    | -4.176406578 |
| plate 23 | G09 | hsa-miR-631      | MIMAT0003300 | AGACCUUGGCCAGACCUCAGC     | 22.93064728  |
| plate 23 | G10 | hsa-miR-1273g-5p | MIMAT0020602 | GGUGGUUGAGGCUGCAGUAAGU    | -2.066128747 |
| plate 23 | G11 | hsa-miR-3197     | MIMAT0015082 | GGAGGCGCAGGCUCGAAAGGCG    | 12.74286256  |
| plate 23 | G12 |                  |              |                           |              |
| plate 23 | H01 |                  |              |                           |              |
| plate 23 | H02 |                  |              |                           |              |
| plate 23 | H03 |                  |              |                           |              |
| plate 23 | H04 |                  |              |                           |              |
| plate 23 | H05 |                  |              |                           |              |
| plate 23 | H06 |                  |              |                           |              |

|          |     |                  |              |                            |              |
|----------|-----|------------------|--------------|----------------------------|--------------|
| plate 23 | H07 |                  |              |                            |              |
| plate 23 | H08 |                  |              |                            |              |
| plate 23 | H09 |                  |              |                            |              |
| plate 23 | H10 |                  |              |                            |              |
| plate 23 | H11 |                  |              |                            |              |
| plate 23 | H12 |                  |              |                            |              |
| plate 24 | A01 |                  |              |                            |              |
| plate 24 | A02 |                  |              |                            |              |
| plate 24 | A03 |                  |              |                            |              |
| plate 24 | A04 |                  |              |                            |              |
| plate 24 | A05 |                  |              |                            |              |
| plate 24 | A06 |                  |              |                            |              |
| plate 24 | A07 |                  |              |                            |              |
| plate 24 | A08 |                  |              |                            |              |
| plate 24 | A09 |                  |              |                            |              |
| plate 24 | A10 |                  |              |                            |              |
| plate 24 | A11 |                  |              |                            |              |
| plate 24 | A12 |                  |              |                            |              |
| plate 24 | B01 |                  |              |                            |              |
| plate 24 | B02 |                  |              |                            |              |
| plate 24 | B03 |                  |              |                            |              |
| plate 24 | B04 | hsa-miR-7850-5p  | MIMAT0030425 | GUUUGGACAUAGUGUGGCUGG      | 4.542553201  |
| plate 24 | B05 | hsa-miR-4749-5p  | MIMAT0019885 | UGCGGGGACAGGCCAGGGCAUC     | -4.581872918 |
| plate 24 | B06 | hsa-miR-3678-3p  | MIMAT0018103 | CUGCAGAGUUUGUACGGACCGG     | 13.58747381  |
| plate 24 | B07 | hsa-miR-378j     | MIMAT0024612 | ACUGGAUUUGGAGCCAGAA        | 11.92409389  |
| plate 24 | B08 | hsa-miR-3064-3p  | MIMAT0019865 | UUGCCACACUGCAACACCUUACA    | -43.46630153 |
| plate 24 | B09 | hsa-miR-3074-3p  | MIMAT0015027 | GAUAUCAGCUCAGUAGGCACCG     | -56.25733456 |
| plate 24 | B10 | hsa-miR-6075     | MIMAT0023700 | ACGGCCCAGGCGGCAUUGGUG      | -1.986251956 |
| plate 24 | B11 | hsa-miR-4505     | MIMAT0019041 | AGGCUGGGCUGGGACGGA         | 22.86467522  |
| plate 24 | B12 |                  |              |                            |              |
| plate 24 | C01 |                  |              |                            |              |
| plate 24 | C02 | hsa-miR-1253     | MIMAT0005904 | AGAGAAGAAGAUACAGCCUGCA     | -58.92310744 |
| plate 24 | C03 | hsa-miR-3612     | MIMAT0017989 | AGGAGGCAUCUUGAGAAAUGGA     | 9.91619011   |
| plate 24 | C04 | hsa-miR-6753-3p  | MIMAT0027407 | UGGUCUGUCUCUGCCCUGGCAC     | 18.87069269  |
| plate 24 | C05 | hsa-miR-6866-5p  | MIMAT0027632 | UUAGAGGCUGGAUAGAGAUUCU     | -12.72417219 |
| plate 24 | C06 | hsa-miR-2277-3p  | MIMAT0011777 | UGACAGCGCCUCGCCUGGCUC      | 11.99892261  |
| plate 24 | C07 | hsa-miR-4270     | MIMAT0016900 | UCAGGGAGUCAGGGGAGGGC       | 7.842811204  |
| plate 24 | C08 | hsa-miR-4473     | MIMAT0019000 | CUAGUGCUCUCGUUACAAGUA      | 20.43741886  |
| plate 24 | C09 | hsa-miR-6088     | MIMAT0023713 | AGAGAUGAAGCGGGGGGCG        | 14.01773891  |
| plate 24 | C10 | hsa-miR-6817-3p  | MIMAT0027535 | UCUCUCUGACUCCAUGGCA        | -54.17771992 |
| plate 24 | C11 | hsa-miR-504-3p   | MIMAT0026612 | GGGAGUGCAGGGCAGGGUUUC      | 12.25146951  |
| plate 24 | C12 |                  |              |                            |              |
| plate 24 | D01 |                  |              |                            |              |
| plate 24 | D02 | hsa-miR-4440     | MIMAT0018958 | UGUCGUGGGGCUUGCUGGCUUG     | 6.199697394  |
| plate 24 | D03 | hsa-miR-4433-3p  | MIMAT0018949 | ACAGGAGUGGGGGUGGGACAU      | 12.45568954  |
| plate 24 | D04 | hsa-miR-4778-5p  | MIMAT0019936 | AAUUCUGUAAAGGAAGAAGAGG     | 8.226308355  |
| plate 24 | D05 | hsa-miR-4524a-5p | MIMAT0019062 | AUAGCAGCAUGAACCUUCUCA      | -21.64437828 |
| plate 24 | D06 | hsa-miR-1288-3p  | MIMAT0005942 | UGGACUGCCUGAUCUGGAGA       | -17.61765819 |
| plate 24 | D07 | hsa-miR-4685-5p  | MIMAT0019771 | CCCAGGGCUUGGAGUGGGGCAAGGUU | 9.805505973  |

|          |     |                  |              |                          |              |
|----------|-----|------------------|--------------|--------------------------|--------------|
| plate 24 | D08 | hsa-miR-5698     | MIMAT0022491 | UGGGGGAGUGCAGUGAUUGUGG   | 17.71240658  |
| plate 24 | D09 | hsa-miR-4520a-3p | MIMAT0019057 | UUGGACAGAAAACACGCAGGAA   | -57.82717859 |
| plate 24 | D10 | hsa-miR-4731-5p  | MIMAT0019853 | UGCUGGGGGCCACAUGAGUGUG   | 12.23588019  |
| plate 24 | D11 | hsa-miR-3155a    | MIMAT0015029 | CCAGGCUCUGCAGUGGGAACU    | 2.975827035  |
| plate 24 | D12 |                  |              |                          |              |
| plate 24 | E01 |                  |              |                          |              |
| plate 24 | E02 | hsa-miR-3155a    | MIMAT0015029 | CCAGGCUCUGCAGUGGGAACU    | -13.77956882 |
| plate 24 | E03 | hsa-miR-4638-3p  | MIMAT0019696 | CCUGGACACCGCUCAGCCGGCCG  | -46.11804403 |
| plate 24 | E04 | hsa-miR-4734     | MIMAT0019859 | GCUGCGGGCUCGGUCAGGGCG    | 15.88689779  |
| plate 24 | E05 | hsa-miR-5004-5p  | MIMAT0021027 | UGAGGACAGGGCAAUUCACGA    | -47.97317252 |
| plate 24 | E06 | hsa-miR-6891-5p  | MIMAT0027682 | UAAGGAGGGGGAUGAGGGG      | 15.07313554  |
| plate 24 | E07 | hsa-miR-4769-5p  | MIMAT0019922 | GGUGGGAUGGAGAGAAGGUUAGAG | 27.17979763  |
| plate 24 | E08 | hsa-miR-1587     | MIMAT0019077 | UUGGGCUGGGCUGGGUUGGG     | 11.06512263  |
| plate 24 | E09 | hsa-miR-4660     | MIMAT0019728 | UGCAGCUCUGGUGGAAAUGGAG   | -15.55830967 |
| plate 24 | E10 | hsa-miR-4705     | MIMAT0019805 | UCAAUCACUUGGUAAUUGCUGU   | 12.6318488   |
| plate 24 | E11 | hsa-miR-564      | MIMAT0003228 | AGGCACGGUGUCAGCAGGC      | 20.56369231  |
| plate 24 | E12 |                  |              |                          |              |
| plate 24 | F01 |                  |              |                          |              |
| plate 24 | F02 | hsa-miR-1910-5p  | MIMAT0007884 | CCAGUCCUGUGCCUGCCGCCU    | 13.01222809  |
| plate 24 | F03 | hsa-miR-3191-3p  | MIMAT0015075 | UGGGGACGUAGCUGGCCAGACAG  | 14.70834557  |
| plate 24 | F04 | hsa-miR-5695     | MIMAT0022488 | ACUCCAAGAAGAAUCUAGACAG   | -48.45644129 |
| plate 24 | F05 | hsa-miR-6085     | MIMAT0023710 | AAGGGCUGGGGGAGCACA       | 15.61720264  |
| plate 24 | F06 | hsa-miR-6086     | MIMAT0023711 | GGAGGUUGGGAAGGGCAGAG     | 11.44238406  |
| plate 24 | F07 | hsa-miR-770-5p   | MIMAT0003948 | UCCAGUACCACGUGUCAGGGCCA  | 30.20724262  |
| plate 24 | F08 | hsa-miR-1182     | MIMAT0005827 | GAGGGUCUUGGGAGGGAUGUGAC  | 13.92887981  |
| plate 24 | F09 | hsa-miR-2115-5p  | MIMAT0011158 | AGCUUCCAUGACUCCUGAUGGA   | 12.98728518  |
| plate 24 | F10 | hsa-miR-3185     | MIMAT0015065 | AGAAGAAGGCGGUCGGUCUGCGG  | 1.971875143  |
| plate 24 | F11 | hsa-miR-6799-5p  | MIMAT0027498 | GGGGAGGUGUGCAGGGCUGG     | 5.903500407  |
| plate 24 | F12 |                  |              |                          |              |
| plate 24 | G01 |                  |              |                          |              |
| plate 24 | G02 | hsa-miR-3657     | MIMAT0018077 | UGUGUCCAUUUAUUGGUGAUU    | -47.84066334 |
| plate 24 | G03 | hsa-miR-6810-5p  | MIMAT0027520 | AUGGGGACAGGGAUCAGCAUGGC  | -12.83329739 |
| plate 24 | G04 | hsa-miR-4755-5p  | MIMAT0019895 | UUUCCCUUCAGAGCCUGGCUUU   | -69.57684536 |
| plate 24 | G05 | hsa-miR-6763-5p  | MIMAT0027426 | CUGGGGAGUGGCUGGGGAG      | 7.63235545   |
| plate 24 | G06 | hsa-miR-1245b-5p | MIMAT0019950 | UAGGCCUUUAGAUCACUUAAA    | 24.01828453  |
| plate 24 | G07 | hsa-miR-5194     | MIMAT0021125 | UGAGGGGUUUGGAAUGGGAUGG   | -16.51237575 |
| plate 24 | G08 | hsa-miR-7974     | MIMAT0031177 | AGGCUGUGAUGCUCUCCUGAGCCC | -1.85530171  |
| plate 24 | G09 | hsa-miR-1343-3p  | MIMAT0019776 | CUCCUGGGGCCCGCACUCUCGC   | 8.631630547  |
| plate 24 | G10 | hsa-miR-3914     | MIMAT0018188 | AAGGAACCAGAAAUGAGAAGU    | 10.40881247  |
| plate 24 | G11 | hsa-miR-4311     | MIMAT0016863 | GAAAGAGAGCUGAGUGUG       | 9.697939699  |
| plate 24 | G12 |                  |              |                          |              |
| plate 24 | H01 |                  |              |                          |              |
| plate 24 | H02 |                  |              |                          |              |
| plate 24 | H03 |                  |              |                          |              |
| plate 24 | H04 |                  |              |                          |              |
| plate 24 | H05 |                  |              |                          |              |
| plate 24 | H06 |                  |              |                          |              |
| plate 24 | H07 |                  |              |                          |              |
| plate 24 | H08 |                  |              |                          |              |

|          |     |                  |              |                           |              |
|----------|-----|------------------|--------------|---------------------------|--------------|
| plate 24 | H09 |                  |              |                           |              |
| plate 24 | H10 |                  |              |                           |              |
| plate 24 | H11 |                  |              |                           |              |
| plate 24 | H12 |                  |              |                           |              |
| plate 25 | A01 |                  |              |                           |              |
| plate 25 | A02 |                  |              |                           |              |
| plate 25 | A03 |                  |              |                           |              |
| plate 25 | A04 |                  |              |                           |              |
| plate 25 | A05 |                  |              |                           |              |
| plate 25 | A06 |                  |              |                           |              |
| plate 25 | A07 |                  |              |                           |              |
| plate 25 | A08 |                  |              |                           |              |
| plate 25 | A09 |                  |              |                           |              |
| plate 25 | A10 |                  |              |                           |              |
| plate 25 | A11 |                  |              |                           |              |
| plate 25 | A12 |                  |              |                           |              |
| plate 25 | B01 |                  |              |                           |              |
| plate 25 | B02 |                  |              |                           |              |
| plate 25 | B03 |                  |              |                           |              |
| plate 25 | B04 | hsa-miR-6514-3p  | MIMAT0025485 | CUGCCUGUUCUUCCACUCCAG     | 15.34065422  |
| plate 25 | B05 | hsa-miR-3129-3p  | MIMAT0019202 | AAACUAAUCUCUACACUGCUGC    | 13.08606348  |
| plate 25 | B06 | hsa-miR-6832-5p  | MIMAT0027564 | AGUAGAGAGGAAAAGUUAGGGUC   | 1.875079107  |
| plate 25 | B07 | hsa-miR-7851-3p  | MIMAT0030426 | UACCUGGGGAGACUGAGGUUGGA   | -4.697317193 |
| plate 25 | B08 | hsa-miR-5708     | MIMAT0022502 | AUGAGCGACUGUGCCUGACC      | 15.5156265   |
| plate 25 | B09 | hsa-miR-6507-3p  | MIMAT0025471 | CAAAGUCCUUCUUAUUUUUCCC    | 8.108466613  |
| plate 25 | B10 | hsa-miR-6840-5p  | MIMAT0027582 | ACCCCGGGCAAAGACCUGCAGAU   | -32.88608069 |
| plate 25 | B11 | hsa-miR-6842-5p  | MIMAT0027586 | UGGGGGUGGUCUCUAGCCAAGG    | 11.53136186  |
| plate 25 | B12 |                  |              |                           |              |
| plate 25 | C01 |                  |              |                           |              |
| plate 25 | C02 | hsa-miR-4639-5p  | MIMAT0019697 | UUGCUAAGUAGGCUGAGAUUGA    | -22.72310738 |
| plate 25 | C03 | hsa-miR-4650-5p  | MIMAT0019713 | UCAGGCCUCUUUCUACCUU       | -16.77951771 |
| plate 25 | C04 | hsa-miR-1245b-3p | MIMAT0019951 | UCAGAUGAUCUAAAGGCCUAUA    | -12.57289246 |
| plate 25 | C05 | hsa-miR-3944-3p  | MIMAT0018360 | UUCGGGCUGGCCUGCUCUCCGG    | -9.82254692  |
| plate 25 | C06 | hsa-miR-4469     | MIMAT0018996 | GCUCCUCUAGGGUCGCUCGGA     | 21.77999868  |
| plate 25 | C07 | hsa-miR-3170     | MIMAT0015045 | CUGGGGUUCUGAGACAGACAGU    | -22.0851876  |
| plate 25 | C08 | hsa-miR-7852-3p  | MIMAT0030427 | UAUGUAGUAGUCAAGGCAUUU     | 3.777902662  |
| plate 25 | C09 | hsa-miR-4530     | MIMAT0019069 | CCCAGCAGGACGGGAGCG        | 6.834449693  |
| plate 25 | C10 | hsa-miR-548ar-5p | MIMAT0022265 | AAAAGUAAUUGCAGUUUUUGC     | 9.459033906  |
| plate 25 | C11 | hsa-miR-3187-5p  | MIMAT0019216 | CCUGGGCAGCGUGUGGCUGAAGG   | -15.89007528 |
| plate 25 | C12 |                  |              |                           |              |
| plate 25 | D01 |                  |              |                           |              |
| plate 25 | D02 | hsa-miR-6797-5p  | MIMAT0027494 | AGGAGGGAAGGGGCUGAGAACAGGA | -39.75738797 |
| plate 25 | D03 | hsa-miR-3122     | MIMAT0014984 | GUUGGGACAAGAGGACGGUCUU    | -2.987692199 |
| plate 25 | D04 | hsa-miR-4506     | MIMAT0019042 | AAUUGGGUGGUCUGAGGCAA      | -24.15569293 |
| plate 25 | D05 | hsa-miR-4513     | MIMAT0019050 | AGACUGACGGCUGGAGGCCAU     | 2.591371882  |
| plate 25 | D06 | hsa-miR-4635     | MIMAT0019692 | UCUUGAAGUCAGAACCCGCAA     | 18.94581226  |
| plate 25 | D07 | hsa-miR-4762-3p  | MIMAT0019911 | CUUCUGAUAAGAUUUGUGGUG     | 1.002040331  |
| plate 25 | D08 | hsa-miR-6505-5p  | MIMAT0025466 | UUGGAAUAGGGGAUAUCUCAGC    | -40.33151577 |
| plate 25 | D09 | hsa-miR-6727-5p  | MIMAT0027355 | CUCGGGGCAGGCGCUGGGAGCG    | -0.018631308 |

|          |     |                  |              |                          |              |
|----------|-----|------------------|--------------|--------------------------|--------------|
| plate 25 | D10 | hsa-miR-6720-5p  | MIMAT0027345 | UUCCAGCCCUGGUAGGCGCCGCG  | 0.981991424  |
| plate 25 | D11 | hsa-miR-1915-5p  | MIMAT0007891 | ACCUUGCCUUGCUGCCCCGGGCC  | -29.66185189 |
| plate 25 | D12 |                  |              |                          |              |
| plate 25 | E01 |                  |              |                          |              |
| plate 25 | E02 | hsa-miR-2114-3p  | MIMAT0011157 | CGAGCCUCAAGCAAGGGACUU    | -44.94276442 |
| plate 25 | E03 | hsa-miR-3194-3p  | MIMAT0019218 | AGCUCUGCUCACUGGCAGU      | -31.09261481 |
| plate 25 | E04 | hsa-miR-3922-3p  | MIMAT0018197 | UCUGGCCUUGACUUGACUUUU    | -23.99165641 |
| plate 25 | E05 | hsa-miR-4523     | MIMAT0019061 | GACCGAGAGGGCCUCGGCUGU    | 14.68086291  |
| plate 25 | E06 | hsa-miR-4784     | MIMAT0019948 | UGAGGAGAUGCUGGGACUGA     | -43.51929201 |
| plate 25 | E07 | hsa-miR-5699-3p  | MIMAT0022492 | UCCUGUCUUCCUUGUUGGAGC    | 3.706820172  |
| plate 25 | E08 | hsa-miR-6746-5p  | MIMAT0027392 | CCGGGAGAAGGAGGUGGCCUGG   | 5.476591888  |
| plate 25 | E09 | hsa-miR-4700-5p  | MIMAT0019796 | UCUGGGGAUGAGGACAGUGUGU   | -18.61490403 |
| plate 25 | E10 | hsa-miR-3680-5p  | MIMAT0018106 | GACUCACUCACAGGAUUGUGCA   | -24.96858498 |
| plate 25 | E11 | hsa-miR-6165     | MIMAT0024782 | CAGCAGGAGGUGAGGGGAG      | 6.581104411  |
| plate 25 | E12 |                  |              |                          |              |
| plate 25 | F01 |                  |              |                          |              |
| plate 25 | F02 | hsa-miR-6736-5p  | MIMAT0027373 | CUGGGUGAGGGCAUCUGUGGU    | -12.92830491 |
| plate 25 | F03 | hsa-miR-3150b-5p | MIMAT0019226 | CAACCUCGAGGAUCUCCCCAGC   | -4.547861703 |
| plate 25 | F04 | hsa-miR-3171     | MIMAT0015046 | AGAUGUAUGGAAUCUGUAUAUAUC | 3.201952237  |
| plate 25 | F05 | hsa-miR-635      | MIMAT0003305 | ACUUGGGCACUGAAACAAUGUCC  | -30.55493957 |
| plate 25 | F06 | hsa-miR-593-3p   | MIMAT0004802 | UGUCUCUGCUGGGGUUUUCU     | 11.16136839  |
| plate 25 | F07 | hsa-miR-519e-5p  | MIMAT0002828 | UUCUCCAAAAGGGAGCACUUUC   | -41.69848671 |
| plate 25 | F08 | hsa-miR-3659     | MIMAT0018080 | UGAGUGUUGUCUACGAGGGCA    | 4.494195436  |
| plate 25 | F09 | hsa-miR-4754     | MIMAT0019894 | AUGCGGACCUGGGUUAGCGGAGU  | 5.192261932  |
| plate 25 | F10 | hsa-miR-6509-5p  | MIMAT0025474 | AUUAGGUAGUGGCAGUGGAAC    | -35.86607735 |
| plate 25 | F11 | hsa-miR-891a-3p  | MIMAT0026717 | AGUGGCACAUGUUUGUUGUGAG   | 2.263298855  |
| plate 25 | F12 |                  |              |                          |              |
| plate 25 | G01 |                  |              |                          |              |
| plate 25 | G02 | hsa-miR-937-5p   | MIMAT0022938 | GUGAGUCAGGGUGGGGCUGG     | 1.018443982  |
| plate 25 | G03 | hsa-miR-5006-5p  | MIMAT0021033 | UUGCCAGGGCAGGAGGUGGAA    | -11.49936461 |
| plate 25 | G04 | hsa-miR-5739     | MIMAT0023116 | GCGGAGAGAGAAUGGGGAGC     | 23.66459596  |
| plate 25 | G05 | hsa-miR-6849-5p  | MIMAT0027598 | GAGUGGAUAGGGGAGUGUGUGGA  | 4.825913719  |
| plate 25 | G06 | hsa-miR-548aj-3p | MIMAT0018990 | UAAAAACUGCAAUUACUUUA     | 0.529979698  |
| plate 25 | G07 | hsa-miR-548x-3p  | MIMAT0015081 | UAAAAACUGCAAUUACUUUC     | -26.64540267 |
| plate 25 | G08 | hsa-miR-3617-5p  | MIMAT0017997 | AAAGACAUAGUUGCAAGAUGGG   | -5.717988831 |
| plate 25 | G09 | hsa-miR-4649-5p  | MIMAT0019711 | UGGGCGAGGGGUGGGCUCUCAGAG | -4.666332518 |
| plate 25 | G10 | hsa-miR-4659a-3p | MIMAT0019727 | UUUCUUCUAGACAUGGCAACG    | 6.686816831  |
| plate 25 | G11 | hsa-miR-761      | MIMAT0010364 | GCAGCAGGGUGAAACUGACACA   | -21.3014576  |
| plate 25 | G12 |                  |              |                          |              |
| plate 25 | H01 |                  |              |                          |              |
| plate 25 | H02 |                  |              |                          |              |
| plate 25 | H03 |                  |              |                          |              |
| plate 25 | H04 |                  |              |                          |              |
| plate 25 | H05 |                  |              |                          |              |
| plate 25 | H06 |                  |              |                          |              |
| plate 25 | H07 |                  |              |                          |              |
| plate 25 | H08 |                  |              |                          |              |
| plate 25 | H09 |                  |              |                          |              |
| plate 25 | H10 |                  |              |                          |              |

|          |     |                  |              |                            |              |
|----------|-----|------------------|--------------|----------------------------|--------------|
| plate 25 | H11 |                  |              |                            |              |
| plate 25 | H12 |                  |              |                            |              |
| plate 26 | A01 |                  |              |                            |              |
| plate 26 | A02 |                  |              |                            |              |
| plate 26 | A03 |                  |              |                            |              |
| plate 26 | A04 |                  |              |                            |              |
| plate 26 | A05 |                  |              |                            |              |
| plate 26 | A06 |                  |              |                            |              |
| plate 26 | A07 |                  |              |                            |              |
| plate 26 | A08 |                  |              |                            |              |
| plate 26 | A09 |                  |              |                            |              |
| plate 26 | A10 |                  |              |                            |              |
| plate 26 | A11 |                  |              |                            |              |
| plate 26 | A12 |                  |              |                            |              |
| plate 26 | B01 |                  |              |                            |              |
| plate 26 | B02 |                  |              |                            |              |
| plate 26 | B03 |                  |              |                            |              |
| plate 26 | B04 | hsa-miR-1244     | MIMAT0005896 | AAGUAGUUGGUUUGUAUGAGAUGGUU | 0.976675848  |
| plate 26 | B05 | hsa-miR-548y     | MIMAT0018354 | AAAAGUAAUCACUGUUUUUGCC     | -8.290704028 |
| plate 26 | B06 | hsa-miR-4662a-3p | MIMAT0019732 | AAAGAUAGACAAUUGGCUAAAU     | 5.240078247  |
| plate 26 | B07 | hsa-miR-4728-3p  | MIMAT0019850 | CAUGCUGACCUCCUCCUGCCCCAG   | -28.96226068 |
| plate 26 | B08 | hsa-miR-4755-3p  | MIMAT0019896 | AGCCAGGCUCUGAAGGGAAAGU     | 5.663021354  |
| plate 26 | B09 | hsa-miR-6879-5p  | MIMAT0027658 | CAGGGCAGGGAAGGUGGGAGAG     | -8.256732694 |
| plate 26 | B10 | hsa-miR-6500-3p  | MIMAT0025455 | ACACUUGUUGGAUGACCUGC       | -4.367014967 |
| plate 26 | B11 | hsa-miR-6778-5p  | MIMAT0027456 | AGUGGGAGGACAGGAGGCAGGU     | -1.656102525 |
| plate 26 | B12 |                  |              |                            |              |
| plate 26 | C01 |                  |              |                            |              |
| plate 26 | C02 | hsa-miR-6838-5p  | MIMAT0027578 | AAGCAGCAGUGGCAAGACUCCU     | -28.44419784 |
| plate 26 | C03 | hsa-miR-3529-5p  | MIMAT0019828 | AGGUAGACUGGGAUUUGUUGUU     | 0.24119647   |
| plate 26 | C04 | hsa-miR-4479     | MIMAT0019011 | CGCGCGGCCGUGCUCGGAGCAG     | 14.93889406  |
| plate 26 | C05 | hsa-miR-4674     | MIMAT0019756 | CUGGGCUCGGGACGCGCGGCU      | -2.80433361  |
| plate 26 | C06 | hsa-miR-6887-5p  | MIMAT0027674 | UGGGGGGACAGAUGGAGAGGACA    | -1.156723918 |
| plate 26 | C07 | hsa-miR-920      | MIMAT0004970 | GGGGAGCUGUGGAAGCAGUA       | 2.838304944  |
| plate 26 | C08 | hsa-miR-3620-3p  | MIMAT0018001 | UCACCCUGCAUCCCGACCCAG      | -49.23805129 |
| plate 26 | C09 | hsa-miR-3942-5p  | MIMAT0018358 | AAGCAAUACUGUUACCUGAAAU     | -0.866269013 |
| plate 26 | C10 | hsa-miR-6771-5p  | MIMAT0027442 | CUCGGGAGGGCAUGGGCCAGGC     | -10.25254856 |
| plate 26 | C11 | hsa-miR-3689f    | MIMAT0019010 | UGUGAUAUUCGUGCUUCCUGGGA    | -4.708426872 |
| plate 26 | C12 |                  |              |                            |              |
| plate 26 | D01 |                  |              |                            |              |
| plate 26 | D02 | hsa-miR-1912     | MIMAT0007887 | UACCCAGAGCAUGCAGUGUGAA     | -49.50982196 |
| plate 26 | D03 | hsa-miR-3126-5p  | MIMAT0014989 | UGAGGGACAGAUGCCAGAAGCA     | -6.530988934 |
| plate 26 | D04 | hsa-miR-3186-5p  | MIMAT0015067 | CAGGCGUCUGUCUACGUGGCUU     | 12.23137875  |
| plate 26 | D05 | hsa-miR-676-5p   | MIMAT0018203 | UCUUAACCUACAGGACUUGCA      | -41.0730412  |
| plate 26 | D06 | hsa-miR-1913     | MIMAT0007888 | UCUGCCCCUCCGUCUGCCA        | 3.490554554  |
| plate 26 | D07 | hsa-miR-4447     | MIMAT0018966 | GGUGGGGGCUGUUGUUU          | 6.553070301  |
| plate 26 | D08 | hsa-miR-4766-3p  | MIMAT0019918 | AUAGCAAUUGCUCUUUUGGAA      | -12.41822109 |
| plate 26 | D09 | hsa-miR-5579-3p  | MIMAT0022270 | UUAGCUUAAGGAGUACCAGAUC     | -39.77193911 |
| plate 26 | D10 | hsa-miR-6833-5p  | MIMAT0027566 | GUGUGGAAGAUGGGAGGAGAAA     | -4.801848041 |
| plate 26 | D11 | hsa-miR-1914-5p  | MIMAT0007889 | CCCUGUGCCCGGCCACUUCUG      | -58.09437803 |

|          |     |                 |              |                          |              |
|----------|-----|-----------------|--------------|--------------------------|--------------|
| plate 26 | D12 |                 |              |                          |              |
| plate 26 | E01 |                 |              |                          |              |
| plate 26 | E02 | hsa-miR-4529-3p | MIMAT0019068 | AUUGGACUGCUGAUGGCCCGU    | -17.33047597 |
| plate 26 | E03 | hsa-miR-6747-3p | MIMAT0027395 | UCCUGCCUCCUCUGCACCAG     | -59.67574362 |
| plate 26 | E04 | hsa-miR-6751-5p | MIMAT0027402 | UUGGGGGUGAGGUUGGUGUCUGG  | -5.010771744 |
| plate 26 | E05 | hsa-miR-1252-3p | MIMAT0026744 | CAAUUGAGCUUAAUUUCCUUUU   | 3.155936915  |
| plate 26 | E06 | hsa-miR-6758-3p | MIMAT0027417 | ACUCAUUCUCCUCUGUCCAG     | -54.005928   |
| plate 26 | E07 | hsa-miR-2682-5p | MIMAT0013517 | CAGGCAGUGACUGUUCAGACGUC  | -13.37621271 |
| plate 26 | E08 | hsa-miR-3137    | MIMAT0015005 | UCUGUAGCCUGGGAGCAAUGGGGU | -12.33329276 |
| plate 26 | E09 | hsa-miR-6774-3p | MIMAT0027449 | UCGUGUCCUCUUGUCCACAG     | -30.69819584 |
| plate 26 | E10 | hsa-miR-6802-5p | MIMAT0027504 | CUAGGUGGGGGCUUGAAGC      | -11.96810092 |
| plate 26 | E11 | hsa-miR-6858-5p | MIMAT0027616 | GUGAGGAGGGGCUGGCAGGGAC   | -2.101126999 |
| plate 26 | E12 |                 |              |                          |              |
| plate 26 | F01 |                 |              |                          |              |
| plate 26 | F02 | hsa-miR-875-5p  | MIMAT0004922 | UAUACCUCAGUUUUAUCAGGUG   | -6.765391137 |
| plate 26 | F03 | hsa-miR-4424    | MIMAT0018939 | AGAGUUAACUCAAAAUGGACUA   | 2.911343311  |
| plate 26 | F04 | hsa-miR-4533    | MIMAT0019072 | UGGAAGGAGGUUGCCGGACGCU   | -10.00625639 |
| plate 26 | F05 | hsa-miR-4649-3p | MIMAT0019712 | UCUGAGGCCUGCCUCUCCCA     | -58.6413165  |
| plate 26 | F06 | hsa-miR-4722-5p | MIMAT0019836 | GGCAGGAGGGCUGUGCCAGGUUG  | -26.89510501 |
| plate 26 | F07 | hsa-miR-4783-3p | MIMAT0019947 | CCCCGGUGUUGGGGCGGUCUGC   | -2.656558308 |
| plate 26 | F08 | hsa-miR-6739-5p | MIMAT0027379 | UGGAAAGAGAAAGAACAAGUA    | -56.62002214 |
| plate 26 | F09 | hsa-miR-6847-5p | MIMAT0027594 | ACAGAGGACAGUGGAGUGUGAGC  | -20.55265698 |
| plate 26 | F10 | hsa-miR-495-5p  | MIMAT0022924 | GAAGUUGCCCAUGUUUUUUCG    | -20.76327925 |
| plate 26 | F11 | hsa-miR-6751-3p | MIMAT0027403 | ACUGAGCCUCUCUCUCCAG      | -30.86295681 |
| plate 26 | F12 |                 |              |                          |              |
| plate 26 | G01 |                 |              |                          |              |
| plate 26 | G02 | hsa-miR-6865-5p | MIMAT0027630 | UAGGUGGCAGAGGAGGGACUUCA  | -4.485914636 |
| plate 26 | G03 | hsa-miR-6763-3p | MIMAT0027427 | CUCCCCGGCCUCUGCCCCCAG    | -11.22582727 |
| plate 26 | G04 | hsa-miR-6811-5p | MIMAT0027522 | AUGCAGGCCUGUGUACAGCACU   | -5.294432381 |
| plate 26 | G05 | hsa-miR-6738-5p | MIMAT0027377 | CGAGGGGUAGAAGAGCACAGGGG  | -1.141436818 |
| plate 26 | G06 | hsa-miR-8085    | MIMAT0031012 | UGGGAGAGAGGACUGUGAGGC    | -9.270777009 |
| plate 26 | G07 | hsa-miR-548f-5p | MIMAT0026739 | UGCAAAGUAAUCACAGUUUUU    | -9.340418244 |
| plate 26 | G08 | hsa-miR-4468    | MIMAT0018995 | AGAGCAGAAGGAUGAGAU       | -2.592012773 |
| plate 26 | G09 | hsa-miR-4723-3p | MIMAT0019839 | CCCUCUCUGGUCCUCCCAAA     | -60.25665343 |
| plate 26 | G10 | hsa-miR-4758-5p | MIMAT0019903 | GUGAGUGGGAGCCGGUGGGGUG   | -20.34203471 |
| plate 26 | G11 | hsa-miR-6741-5p | MIMAT0027383 | GUGGGUGCUGGUGGGAGCCGUG   | -7.774339753 |
| plate 26 | G12 |                 |              |                          |              |
| plate 26 | H01 |                 |              |                          |              |
| plate 26 | H02 |                 |              |                          |              |
| plate 26 | H03 |                 |              |                          |              |
| plate 26 | H04 |                 |              |                          |              |
| plate 26 | H05 |                 |              |                          |              |
| plate 26 | H06 |                 |              |                          |              |
| plate 26 | H07 |                 |              |                          |              |
| plate 26 | H08 |                 |              |                          |              |
| plate 26 | H09 |                 |              |                          |              |
| plate 26 | H10 |                 |              |                          |              |
| plate 26 | H11 |                 |              |                          |              |
| plate 26 | H12 |                 |              |                          |              |

|          |     |                 |              |                         |              |
|----------|-----|-----------------|--------------|-------------------------|--------------|
| plate 27 | A01 |                 |              |                         |              |
| plate 27 | A02 |                 |              |                         |              |
| plate 27 | A03 |                 |              |                         |              |
| plate 27 | A04 |                 |              |                         |              |
| plate 27 | A05 |                 |              |                         |              |
| plate 27 | A06 |                 |              |                         |              |
| plate 27 | A07 |                 |              |                         |              |
| plate 27 | A08 |                 |              |                         |              |
| plate 27 | A09 |                 |              |                         |              |
| plate 27 | A10 |                 |              |                         |              |
| plate 27 | A11 |                 |              |                         |              |
| plate 27 | A12 |                 |              |                         |              |
| plate 27 | B01 |                 |              |                         |              |
| plate 27 | B02 |                 |              |                         |              |
| plate 27 | B03 |                 |              |                         |              |
| plate 27 | B04 | hsa-miR-6758-5p | MIMAT0027416 | UAGAGAGGGGAAGGAUGUGAUGU | -3.537264602 |
| plate 27 | B05 | hsa-miR-518d-3p | MIMAT0002864 | CAAAGCGCUUCCUUUGGAGC    | 29.64544696  |
| plate 27 | B06 | hsa-miR-4761-3p | MIMAT0019909 | GAGGGCAUGCGCACUUUGUCC   | 6.591131276  |
| plate 27 | B07 | hsa-miR-7854-3p | MIMAT0030429 | UGAGGUGACCCGACAGAUGGGAA | -12.56171309 |
| plate 27 | B08 | hsa-miR-4776-5p | MIMAT0019932 | GUGGACCAGGAUGGCAAGGGCU  | 8.363692397  |
| plate 27 | B09 | hsa-miR-499a-3p | MIMAT0004772 | AACAUCACAGCAAGUCUGUGCU  | 15.78457004  |
| plate 27 | B10 | hsa-miR-1914-3p | MIMAT0007890 | GGAGGGGUCCCGCACUGGGAGG  | 25.43354784  |
| plate 27 | B11 | hsa-miR-4279    | MIMAT0016909 | CUCUCCUCCCGGCUUC        | 22.0078209   |
| plate 27 | B12 |                 |              |                         |              |
| plate 27 | C01 |                 |              |                         |              |
| plate 27 | C02 | hsa-miR-4300    | MIMAT0016853 | UGGGAGCUGGACUACUUC      | 16.53951577  |
| plate 27 | C03 | hsa-miR-4638-5p | MIMAT0019695 | ACUCGGCUGCGGUGGACAAGU   | 14.54836939  |
| plate 27 | C04 | hsa-miR-4658    | MIMAT0019725 | GUGAGUGUGGAUCCUGGAGGAAU | 5.321867302  |
| plate 27 | C05 | hsa-miR-4695-5p | MIMAT0019788 | CAGGAGGCAGUGGGCGAGCAGG  | -16.3584839  |
| plate 27 | C06 | hsa-miR-5584-5p | MIMAT0022283 | CAGGGAAAUGGGAAGAACUAGA  | -62.37159902 |
| plate 27 | C07 | hsa-miR-5680    | MIMAT0022468 | GAGAAAUGCUGGACUAAUCUGC  | -31.36371893 |
| plate 27 | C08 | hsa-miR-6502-5p | MIMAT0025460 | AGCUCUAGAAAGAUUGUUGACC  | -25.47844864 |
| plate 27 | C09 | hsa-miR-4483    | MIMAT0019017 | GGGGUGGUCUGUUGUUG       | 25.72744398  |
| plate 27 | C10 | hsa-miR-370-5p  | MIMAT0026483 | CAGGUCACGUCUCUGCAGUUAC  | 47.48310607  |
| plate 27 | C11 | hsa-miR-3939    | MIMAT0018355 | UACGCGCAGACCACAGGAUGUC  | 4.937965463  |
| plate 27 | C12 |                 |              |                         |              |
| plate 27 | D01 |                 |              |                         |              |
| plate 27 | D02 | hsa-miR-451b    | MIMAT0019840 | UAGCAAGAGAACCAUUACCAU   | 32.16193269  |
| plate 27 | D03 | hsa-miR-3678-5p | MIMAT0018102 | UCCGUACAAACUCUGCUGUG    | 9.989305446  |
| plate 27 | D04 | hsa-miR-4453    | MIMAT0018975 | GAGCUUGGUCUGUAGCGGUU    | 22.03353682  |
| plate 27 | D05 | hsa-miR-4670-5p | MIMAT0019750 | AAGCGACCAUGAUGUAACUUCA  | -23.95937294 |
| plate 27 | D06 | hsa-miR-4743-5p | MIMAT0019874 | UGGCCGGAUGGGACAGGAGGCAU | 19.07804371  |
| plate 27 | D07 | hsa-miR-4762-5p | MIMAT0019910 | CCAAUUCUUGAUCAGAAGCCU   | -37.9120924  |
| plate 27 | D08 | hsa-miR-4774-5p | MIMAT0019929 | UCUGGUAUGUAGUAGGUAAUAA  | 28.13004496  |
| plate 27 | D09 | hsa-miR-6132    | MIMAT0024616 | AGCAGGGCUGGGGAUUGCA     | 13.51789603  |
| plate 27 | D10 | hsa-miR-6748-5p | MIMAT0027396 | UGUGGGUGGGAAGGACUGGAU   | 14.61816972  |
| plate 27 | D11 | hsa-miR-6793-3p | MIMAT0027487 | UCCCAACCCUGCCCGCAG      | -21.71290429 |
| plate 27 | D12 |                 |              |                         |              |
| plate 27 | E01 |                 |              |                         |              |

|          |     |                  |              |                          |              |
|----------|-----|------------------|--------------|--------------------------|--------------|
| plate 27 | E02 | hsa-miR-6829-5p  | MIMAT0027558 | UGGGCUGCUGAGAAGGGGCA     | -44.28412818 |
| plate 27 | E03 | hsa-miR-6848-5p  | MIMAT0027596 | UGGGGGCUGGGGAUGGGCCAUGGU | 1.034657295  |
| plate 27 | E04 | hsa-miR-4457     | MIMAT0018979 | UCACAAGGUAAUUGACUGGCGUA  | 31.90844727  |
| plate 27 | E05 | hsa-miR-6802-3p  | MIMAT0027505 | UUCACCCUCUCACCUAAGCAG    | -96.13108176 |
| plate 27 | E06 | hsa-miR-670-3p   | MIMAT0026640 | UUUCCUCAUAUUCAUUCAGGA    | 17.70775294  |
| plate 27 | E07 | hsa-miR-3618     | MIMAT0017998 | UGUCUACAUUAAUGAAAAGAGC   | -52.92651168 |
| plate 27 | E08 | hsa-miR-4655-5p  | MIMAT0019721 | CACCGGGGAUGGCAGAGGGUCG   | 19.58501456  |
| plate 27 | E09 | hsa-miR-4745-3p  | MIMAT0019879 | UGGCCCGGCGACGUCUCACGGUC  | 37.88739696  |
| plate 27 | E10 | hsa-miR-5008-3p  | MIMAT0021040 | CCUGUGCUCACAGGGCCUCGC    | 26.63301148  |
| plate 27 | E11 | hsa-miR-6781-5p  | MIMAT0027462 | CGGGCCGGAGGUCAAGGGCGU    | 13.04949905  |
| plate 27 | E12 |                  |              |                          |              |
| plate 27 | F01 |                  |              |                          |              |
| plate 27 | F02 | hsa-miR-6788-5p  | MIMAT0027476 | CUGGGAGAAGAGUGGUGAAGA    | 21.78188824  |
| plate 27 | F03 | hsa-miR-6881-5p  | MIMAT0027662 | UGGGGUAAGGAUAGGAGGGUCA   | 9.868073286  |
| plate 27 | F04 | hsa-miR-3144-3p  | MIMAT0015015 | AUAUACUGUUCGGUCUCUUUA    | 8.025711831  |
| plate 27 | F05 | hsa-miR-3161     | MIMAT0015035 | CUGAUAAAGAACAGAGGCCAGAU  | -103.2690844 |
| plate 27 | F06 | hsa-miR-4713-5p  | MIMAT0019820 | UUCUCCCACUACCAGGCUCCCA   | -111.1638696 |
| plate 27 | F07 | hsa-miR-4782-5p  | MIMAT0019944 | UUCUGGAUAUGAAGACAAUCAA   | -16.57890601 |
| plate 27 | F08 | hsa-miR-619-3p   | MIMAT0003288 | GACCUGGACAUGUUUGUGCCAGU  | -11.92799953 |
| plate 27 | F09 | hsa-miR-302d-5p  | MIMAT0004685 | ACUUUAACAUGGAGGCACUUGC   | -68.67750817 |
| plate 27 | F10 | hsa-miR-1236-5p  | MIMAT0022945 | UGAGUGACAGGGGAAUUGGGGA   | 1.927366833  |
| plate 27 | F11 | hsa-miR-3150a-5p | MIMAT0019206 | CAACCUCGACGAUCUCCUCAGC   | 4.160977531  |
| plate 27 | F12 |                  |              |                          |              |
| plate 27 | G01 |                  |              |                          |              |
| plate 27 | G02 | hsa-miR-3912-5p  | MIMAT0027036 | AUGUCCAUAUUAUGGGUUAGU    | 9.730309469  |
| plate 27 | G03 | hsa-miR-3941     | MIMAT0018357 | UUACACACAACUGAGGAUCAUA   | -47.14961559 |
| plate 27 | G04 | hsa-miR-4534     | MIMAT0019073 | GGAUGGAGGAGGGGUCU        | 14.99839786  |
| plate 27 | G05 | hsa-miR-4640-3p  | MIMAT0019700 | CACCCCUUUUCCUGGCCAC      | -61.83707541 |
| plate 27 | G06 | hsa-miR-4726-5p  | MIMAT0019845 | AGGGCCAGAGGAGCCUGGAGUGG  | -57.47088081 |
| plate 27 | G07 | hsa-miR-5581-5p  | MIMAT0022275 | AGCCUUCAGGAGAAAUGGAGA    | -32.00661675 |
| plate 27 | G08 | hsa-miR-5586-3p  | MIMAT0022288 | CAGAGUGACAAGCUGGUUAAAG   | 5.191450888  |
| plate 27 | G09 | hsa-miR-6076     | MIMAT0023701 | AGCAUGACAGAGGAGAGGUGG    | 18.12288124  |
| plate 27 | G10 | hsa-miR-6733-5p  | MIMAT0027367 | UGGGAAAGACAAACUCAGAGUU   | -37.8073919  |
| plate 27 | G11 | hsa-miR-6800-3p  | MIMAT0027501 | CACCUCUCCUGGCAUCGCCCC    | 13.20930508  |
| plate 27 | G12 |                  |              |                          |              |
| plate 27 | H01 |                  |              |                          |              |
| plate 27 | H02 |                  |              |                          |              |
| plate 27 | H03 |                  |              |                          |              |
| plate 27 | H04 |                  |              |                          |              |
| plate 27 | H05 |                  |              |                          |              |
| plate 27 | H06 |                  |              |                          |              |
| plate 27 | H07 |                  |              |                          |              |
| plate 27 | H08 |                  |              |                          |              |
| plate 27 | H09 |                  |              |                          |              |
| plate 27 | H10 |                  |              |                          |              |
| plate 27 | H11 |                  |              |                          |              |
| plate 27 | H12 |                  |              |                          |              |
| plate 28 | A01 |                  |              |                          |              |
| plate 28 | A02 |                  |              |                          |              |

|          |     |                  |              |                          |              |
|----------|-----|------------------|--------------|--------------------------|--------------|
| plate 28 | A03 |                  |              |                          |              |
| plate 28 | A04 |                  |              |                          |              |
| plate 28 | A05 |                  |              |                          |              |
| plate 28 | A06 |                  |              |                          |              |
| plate 28 | A07 |                  |              |                          |              |
| plate 28 | A08 |                  |              |                          |              |
| plate 28 | A09 |                  |              |                          |              |
| plate 28 | A10 |                  |              |                          |              |
| plate 28 | A11 |                  |              |                          |              |
| plate 28 | A12 |                  |              |                          |              |
| plate 28 | B01 |                  |              |                          |              |
| plate 28 | B02 |                  |              |                          |              |
| plate 28 | B03 |                  |              |                          |              |
| plate 28 | B04 | hsa-miR-4450     | MIMAT0018971 | UGGGGAUUUGGAGAAGUGGUGA   | -22.32424502 |
| plate 28 | B05 | hsa-miR-1229-5p  | MIMAT0022942 | GUGGGUAGGGUUUGGGGGAGAGCG | 4.268525768  |
| plate 28 | B06 | hsa-miR-1257     | MIMAT0005908 | AGUGAAUGAUGGGUUCUGACC    | 3.361759251  |
| plate 28 | B07 | hsa-miR-3617-3p  | MIMAT0022966 | CAUCAGCACCCUAUGUCCUUUCU  | -61.14207969 |
| plate 28 | B08 | hsa-miR-4499     | MIMAT0019035 | AAGACUGAGAGGAGGGA        | 0.24035693   |
| plate 28 | B09 | hsa-miR-4676-5p  | MIMAT0019758 | GAGCCAGUGGUGAGACAGUGA    | -6.790940334 |
| plate 28 | B10 | hsa-miR-4690-5p  | MIMAT0019779 | GAGCAGGCGAGGCUGGGCUGAA   | 1.712781199  |
| plate 28 | B11 | hsa-miR-6073     | MIMAT0023698 | GGUAGUGAGUUAUCAGCUAC     | 7.888735378  |
| plate 28 | B12 |                  |              |                          |              |
| plate 28 | C01 |                  |              |                          |              |
| plate 28 | C02 | hsa-miR-6716-3p  | MIMAT0025845 | UCCGAACUCUCCAUCCUCUGC    | 10.43248115  |
| plate 28 | C03 | hsa-miR-6764-5p  | MIMAT0027428 | UCCCAGGGUCUGGUCAGAGUUG   | -35.43036371 |
| plate 28 | C04 | hsa-miR-6803-3p  | MIMAT0027507 | UCCUCGCCUUCUCACCCUCAG    | -16.97963632 |
| plate 28 | C05 | hsa-miR-152-5p   | MIMAT0026479 | AGGUUCUGUGAUACACUCCGACU  | 18.98934023  |
| plate 28 | C06 | hsa-miR-4764-5p  | MIMAT0019914 | UGGAUGUGGAAGGAGUUAUCU    | -14.30904609 |
| plate 28 | C07 | hsa-miR-6769b-3p | MIMAT0027621 | CCCUCUCUGUCCCACCCAUAG    | -22.29681919 |
| plate 28 | C08 | hsa-miR-7111-5p  | MIMAT0028119 | UGGGGGAGGAAGGACAGGCCAU   | -53.53998233 |
| plate 28 | C09 | hsa-miR-510-3p   | MIMAT0026613 | AUUGAAACCUCUAAGAGUGGA    | 2.693254635  |
| plate 28 | C10 | hsa-miR-1301-5p  | MIMAT0026639 | CGCUCUAGGCACCCGAGCA      | 10.73587939  |
| plate 28 | C11 | hsa-miR-4637     | MIMAT0019694 | UACUACUGCAGAUUCAAGUGA    | 3.40461211   |
| plate 28 | C12 |                  |              |                          |              |
| plate 28 | D01 |                  |              |                          |              |
| plate 28 | D02 | hsa-miR-4683     | MIMAT0019768 | UGGAGAUCCAGUGCUCGCCGAU   | 3.402897996  |
| plate 28 | D03 | hsa-miR-548ay-3p | MIMAT0025453 | CAAACCGCGAUUACUCUUGCA    | 18.74079364  |
| plate 28 | D04 | hsa-miR-3654     | MIMAT0018074 | GACUGGACAAGCUGAGGAA      | -1.547464388 |
| plate 28 | D05 | hsa-miR-4645-5p  | MIMAT0019705 | ACCAGGCAAGAAAUAUUGU      | 9.969670258  |
| plate 28 | D06 | hsa-miR-4668-3p  | MIMAT0019746 | GAAAAUCCUUUUUGUUUUUCCAG  | 11.17983502  |
| plate 28 | D07 | hsa-miR-4673     | MIMAT0019755 | UCCAGGCAGGAGCCGGACUGGA   | 4.983311472  |
| plate 28 | D08 | hsa-miR-4714-5p  | MIMAT0019822 | AACUCUGACCCCUUAGGUUGAU   | -13.2274399  |
| plate 28 | D09 | hsa-miR-4781-5p  | MIMAT0019942 | UAGCGGGGAUCCAAUAUUGG     | 10.71359591  |
| plate 28 | D10 | hsa-miR-4788     | MIMAT0019958 | UUACGGACCAGCUAAGGGAGGC   | -44.59230517 |
| plate 28 | D11 | hsa-miR-4795-3p  | MIMAT0019969 | AUAUUAUAGCCACUUCUGGAU    | -3.818665966 |
| plate 28 | D12 |                  |              |                          |              |
| plate 28 | E01 |                  |              |                          |              |
| plate 28 | E02 | hsa-miR-4803     | MIMAT0019983 | UAACAUAUAGUGUGGAUUGA     | 1.729922343  |
| plate 28 | E03 | hsa-miR-5190     | MIMAT0021121 | CCAGUGACUGAGCUGGAGCCA    | -23.03388838 |

|          |     |                 |              |                          |              |
|----------|-----|-----------------|--------------|--------------------------|--------------|
| plate 28 | E04 | hsa-miR-5690    | MIMAT0022482 | UCAGCUACUACCUCUAUUAGG    | -12.76977136 |
| plate 28 | E05 | hsa-miR-5692c   | MIMAT0022476 | AAUAAUAUCACAGUAGGUGUAC   | 14.32523495  |
| plate 28 | E06 | hsa-miR-6077    | MIMAT0023702 | GGGAAGAGCUGUACGGCCUUC    | -46.61324605 |
| plate 28 | E07 | hsa-miR-6718-5p | MIMAT0025849 | UAGUGGUCAGAGGGCUUAUGA    | -26.1192943  |
| plate 28 | E08 | hsa-miR-6722-3p | MIMAT0025854 | UGCAGGGGUCGGGUGGGCCAGG   | 2.797815613  |
| plate 28 | E09 | hsa-miR-1911-5p | MIMAT0007885 | UGAGUACCGCCAUGUCUGUUGGG  | -18.70232129 |
| plate 28 | E10 | hsa-miR-329-5p  | MIMAT0026555 | GAGGUUUUCUGGGUUUCUGUUUC  | 3.180063124  |
| plate 28 | E11 | hsa-miR-4758-3p | MIMAT0019904 | UGCCCCACCUUGCUGACCACCCUC | -13.41942071 |
| plate 28 | E12 |                 |              |                          |              |
| plate 28 | F01 |                 |              |                          |              |
| plate 28 | F02 | hsa-miR-4776-3p | MIMAT0019933 | CUUGCCAUCCUGGUCCACUGCAU  | -13.54969341 |
| plate 28 | F03 | hsa-miR-6791-5p | MIMAT0027482 | CCCCUGGGGCGUGGGCAGGCGGA  | -3.87865997  |
| plate 28 | F04 | hsa-miR-6855-3p | MIMAT0027611 | AGACUGACCUUCAACCCACAG    | -63.2384416  |
| plate 28 | F05 | hsa-miR-7107-5p | MIMAT0028111 | UCGGCCUGGGGAGGAGGAAGGG   | -3.273577588 |
| plate 28 | F06 | hsa-miR-7113-5p | MIMAT0028123 | UCCAGGGAGACAGUGUGUGAG    | -29.12070861 |
| plate 28 | F07 | hsa-miR-1193    | MIMAT0015049 | GGGAUGGUAGACCGGUGACGUGC  | -2.62392823  |
| plate 28 | F08 | hsa-miR-494-5p  | MIMAT0026607 | AGGUUGUCCGUGUUGUCUUCUCU  | 0.302065049  |
| plate 28 | F09 | hsa-miR-3152-3p | MIMAT0015025 | UGUGUUAGAAUAGGGGCAUAA    | -39.69336622 |
| plate 28 | F10 | hsa-miR-609     | MIMAT0003277 | AGGGUGUUUCUCUCAUCUCU     | 8.99605328   |
| plate 28 | F11 | hsa-miR-649     | MIMAT0003319 | AAACCUGUGUUGUUCAAGAGUC   | 4.81875649   |
| plate 28 | F12 |                 |              |                          |              |
| plate 28 | G01 |                 |              |                          |              |
| plate 28 | G02 | hsa-miR-3140-5p | MIMAT0019204 | ACCUGAAUUACCAAAAGCUUU    | 5.4032695    |
| plate 28 | G03 | hsa-miR-3152-5p | MIMAT0019207 | AUUGCCUCUGUUCUAACACAAG   | -2.687350463 |
| plate 28 | G04 | hsa-miR-3663-5p | MIMAT0018084 | GCUGGUCUGCGUGGUGCUCGG    | 3.121783235  |
| plate 28 | G05 | hsa-miR-3944-5p | MIMAT0019231 | UGUGCAGCAGGCCAACCGAGA    | -63.11331125 |
| plate 28 | G06 | hsa-miR-4475    | MIMAT0019002 | CAAGGGACCAAGCAUUAUUAU    | -1.691449997 |
| plate 28 | G07 | hsa-miR-4519    | MIMAT0019056 | CAGCAGUGCGCAGGGCUG       | -37.61414545 |
| plate 28 | G08 | hsa-miR-4538    | MIMAT0019081 | GAGCUUGGAUGAGCUGGGCUGA   | -0.131605894 |
| plate 28 | G09 | hsa-miR-5697    | MIMAT0022490 | UCAAGUAGUUCAUGAUAAAGG    | 10.08794415  |
| plate 28 | G10 | hsa-miR-6759-5p | MIMAT0027418 | UUGUGGGUGGGCAGAAGUCUGU   | -23.357856   |
| plate 28 | G11 | hsa-miR-6773-5p | MIMAT0027446 | UUGGGCCAGGAGUAAACAGGAU   | -0.37158191  |
| plate 28 | G12 |                 |              |                          |              |
| plate 28 | H01 |                 |              |                          |              |
| plate 28 | H02 |                 |              |                          |              |
| plate 28 | H03 |                 |              |                          |              |
| plate 28 | H04 |                 |              |                          |              |
| plate 28 | H05 |                 |              |                          |              |
| plate 28 | H06 |                 |              |                          |              |
| plate 28 | H07 |                 |              |                          |              |
| plate 28 | H08 |                 |              |                          |              |
| plate 28 | H09 |                 |              |                          |              |
| plate 28 | H10 |                 |              |                          |              |
| plate 28 | H11 |                 |              |                          |              |
| plate 28 | H12 |                 |              |                          |              |
| plate 29 | A01 |                 |              |                          |              |
| plate 29 | A02 |                 |              |                          |              |
| plate 29 | A03 |                 |              |                          |              |
| plate 29 | A04 |                 |              |                          |              |

|          |     |                  |              |                           |              |
|----------|-----|------------------|--------------|---------------------------|--------------|
| plate 29 | A05 |                  |              |                           |              |
| plate 29 | A06 |                  |              |                           |              |
| plate 29 | A07 |                  |              |                           |              |
| plate 29 | A08 |                  |              |                           |              |
| plate 29 | A09 |                  |              |                           |              |
| plate 29 | A10 |                  |              |                           |              |
| plate 29 | A11 |                  |              |                           |              |
| plate 29 | A12 |                  |              |                           |              |
| plate 29 | B01 |                  |              |                           |              |
| plate 29 | B02 |                  |              |                           |              |
| plate 29 | B03 |                  |              |                           |              |
| plate 29 | B04 | hsa-miR-3119     | MIMAT0014981 | UGGCUUUUAACUUUGAUGGC      | 26.45138846  |
| plate 29 | B05 | hsa-miR-3189-3p  | MIMAT0015071 | CCCUUGGGUCUGAUGGGGUAG     | 7.321214758  |
| plate 29 | B06 | hsa-miR-371b-5p  | MIMAT0019892 | ACUCAAAAGAUGGCGGCACUUU    | -35.16709036 |
| plate 29 | B07 | hsa-miR-432-3p   | MIMAT0002815 | CUGGAUGGCUCUCCAUGUCU      | -51.90093595 |
| plate 29 | B08 | hsa-miR-1267     | MIMAT0005921 | CCUGUUGAAGUGUAAUCCCA      | -4.59246781  |
| plate 29 | B09 | hsa-miR-4664-5p  | MIMAT0019737 | UGGGGUGCCACUCCGCAAGUU     | -25.74034655 |
| plate 29 | B10 | hsa-miR-4680-3p  | MIMAT0019765 | UCUGAAUUGUAAGAGUUGUUA     | 19.01322484  |
| plate 29 | B11 | hsa-miR-4732-3p  | MIMAT0019856 | GCCUGACCUGUCCUGUUCUG      | -51.22782826 |
| plate 29 | B12 |                  |              |                           |              |
| plate 29 | C01 |                  |              |                           |              |
| plate 29 | C02 | hsa-miR-5579-5p  | MIMAT0022269 | UAUGGUACUCCUUAAGCUAAC     | 13.91313962  |
| plate 29 | C03 | hsa-miR-5696     | MIMAT0022489 | CUCAUUUAAGUAGUCUGAUGCC    | 15.03606448  |
| plate 29 | C04 | hsa-miR-6757-5p  | MIMAT0027414 | UAGGGAUGGGAGGCCAGGAUGA    | -5.548733788 |
| plate 29 | C05 | hsa-miR-6801-5p  | MIMAT0027502 | UGGUCAGAGGCAGCAGGAAAUGA   | -19.227706   |
| plate 29 | C06 | hsa-miR-6881-3p  | MIMAT0027663 | AUCCUCUUUCGUCCUUCCACU     | -28.54280454 |
| plate 29 | C07 | hsa-miR-642b-5p  | MIMAT0022736 | GGUUCCUCUCCAAAUGUGUCU     | -8.555065747 |
| plate 29 | C08 | hsa-miR-6812-5p  | MIMAT0027524 | AUGGGGUGAGAUGGGGAGGAGCAGC | 10.76765559  |
| plate 29 | C09 | hsa-miR-548aq-5p | MIMAT0022263 | GAAAGUAAUUGCUGUUUUUGCC    | 15.04415471  |
| plate 29 | C10 | hsa-miR-6851-5p  | MIMAT0027602 | AGGAGGUGGUACUAGGGGCCAGC   | 12.26920353  |
| plate 29 | C11 | hsa-miR-153-5p   | MIMAT0026480 | UCAUUUUUGUGAUGUUGCAGCU    | 16.76899318  |
| plate 29 | C12 |                  |              |                           |              |
| plate 29 | D01 |                  |              |                           |              |
| plate 29 | D02 | hsa-miR-548at-5p | MIMAT0022277 | AAAAGUUAUUGCGGUUUUGGCU    | 14.79982957  |
| plate 29 | D03 | hsa-miR-597-5p   | MIMAT0003265 | UGUGUCACUCGAUGACCACUGU    | -13.38331901 |
| plate 29 | D04 | hsa-miR-3145-5p  | MIMAT0019205 | AACUCCAAACACUCAAACUCA     | -58.55758271 |
| plate 29 | D05 | hsa-miR-3616-5p  | MIMAT0017995 | AUGAAGUGCACUCAUGAUUUGU    | 3.331110016  |
| plate 29 | D06 | hsa-miR-3667-3p  | MIMAT0018090 | ACCUUCCUCUCCAUGGGUCUUU    | -20.51728973 |
| plate 29 | D07 | hsa-miR-3943     | MIMAT0018359 | UAGCCCCAGGCUUCACUUGGCG    | -61.55906053 |
| plate 29 | D08 | hsa-miR-4436b-5p | MIMAT0019940 | GUCCACUUCUGCCUGCCUGCC     | -25.00575306 |
| plate 29 | D09 | hsa-miR-4537     | MIMAT0019080 | UGAGCCGAGCUGAGCUUAGCUG    | -0.647668394 |
| plate 29 | D10 | hsa-miR-4681     | MIMAT0019766 | AACGGGAAUGCAGGCUGUAUCU    | -10.50319474 |
| plate 29 | D11 | hsa-miR-4698     | MIMAT0019793 | UCAAAAUGUAGAGGAAGACCCCA   | -67.85811882 |
| plate 29 | D12 |                  |              |                           |              |
| plate 29 | E01 |                  |              |                           |              |
| plate 29 | E02 | hsa-miR-4770     | MIMAT0019924 | UGAGAUGACACUGUAGCU        | 5.54945292   |
| plate 29 | E03 | hsa-miR-6515-3p  | MIMAT0025487 | UCUCUUAUCUACCCCCAG        | -42.469338   |
| plate 29 | E04 | hsa-miR-6728-5p  | MIMAT0027357 | UUGGGAUGGUAGGACCAGAGGGG   | -35.27711757 |
| plate 29 | E05 | hsa-miR-6756-5p  | MIMAT0027412 | AGGGUGGGGCUUGGAGGUGGGGCU  | 6.240359135  |

|          |     |                  |              |                          |              |
|----------|-----|------------------|--------------|--------------------------|--------------|
| plate 29 | E06 | hsa-miR-6770-5p  | MIMAT0027440 | UGAGAAGGCACAGCUUGCACGUGA | -18.58695926 |
| plate 29 | E07 | hsa-miR-6783-5p  | MIMAT0027466 | UAGGGGAAAAGUCCUGAUCCGG   | -34.94056373 |
| plate 29 | E08 | hsa-miR-6807-5p  | MIMAT0027514 | GUGAGCCAGUGGAAUGGAGAGG   | -23.73558589 |
| plate 29 | E09 | hsa-miR-6818-5p  | MIMAT0027536 | UUGUGUGAGUACAGAGAGCAUC   | -25.23713383 |
| plate 29 | E10 | hsa-miR-6819-5p  | MIMAT0027538 | UUGGGGUGGAGGGCCAAGGAGC   | -37.01651847 |
| plate 29 | E11 | hsa-miR-6824-5p  | MIMAT0027548 | GUAGGGGAGGUUGGGCCAGGGA   | -40.15067616 |
| plate 29 | E12 |                  |              |                          |              |
| plate 29 | F01 |                  |              |                          |              |
| plate 29 | F02 | hsa-miR-6867-5p  | MIMAT0027634 | UGUGUGUGUAGAGGAAGAAGGGA  | -6.047092369 |
| plate 29 | F03 | hsa-miR-6893-5p  | MIMAT0027686 | CAGGCAGGUGUAGGGUGGAGC    | 5.889242862  |
| plate 29 | F04 | hsa-miR-128-2-5p | MIMAT0031095 | GGGGGCCGAUACACUGUACGAGA  | 17.64597484  |
| plate 29 | F05 | hsa-miR-3681-5p  | MIMAT0018108 | UAGUGGAUGAUGCACUCUGUGC   | 5.30027363   |
| plate 29 | F06 | hsa-miR-6726-5p  | MIMAT0027353 | CGGGAGCUGGGGUCUGCAGGU    | 7.154555882  |
| plate 29 | F07 | hsa-miR-6823-5p  | MIMAT0027546 | UCAGGGUUGGUAGGGGUUGCU    | 10.85826624  |
| plate 29 | F08 | hsa-miR-216a-3p  | MIMAT0022844 | UCACAGUGGUCUCUGGGAUUUAU  | -4.241351537 |
| plate 29 | F09 | hsa-miR-1298-5p  | MIMAT0005800 | UUCAUUCGGCUGUCCAGAUGUA   | -59.86011082 |
| plate 29 | F10 | hsa-miR-4312     | MIMAT0016864 | GGCCUUGUUCUGUCCCA        | -54.03675844 |
| plate 29 | F11 | hsa-miR-6509-3p  | MIMAT0025475 | UUCCACUGCCACUACCUAUUUU   | -43.72817883 |
| plate 29 | F12 |                  |              |                          |              |
| plate 29 | G01 |                  |              |                          |              |
| plate 29 | G02 | hsa-miR-6889-5p  | MIMAT0027678 | UCGGGGAGUCUGGGGUCCGAAU   | -3.026197984 |
| plate 29 | G03 | hsa-miR-3157-3p  | MIMAT0019210 | CUGCCCUAGUCUAGCUGAAGCU   | 4.850456469  |
| plate 29 | G04 | hsa-miR-3677-5p  | MIMAT0019221 | CAGUGGCCAGAGCCCUGCAGUG   | -22.35377347 |
| plate 29 | G05 | hsa-miR-3925-5p  | MIMAT0018200 | AAGAGAACUGAAAGUGGAGCCU   | -19.42348973 |
| plate 29 | G06 | hsa-miR-3934-3p  | MIMAT0022975 | UGCUCAGGUUGCACAGCUGGGA   | -30.20777526 |
| plate 29 | G07 | hsa-miR-3945     | MIMAT0018361 | AGGGCAUAGGAGAGGGUUGAUUAU | 5.711257654  |
| plate 29 | G08 | hsa-miR-4418     | MIMAT0018930 | CACUGCAGGACUCAGCAG       | -20.91209329 |
| plate 29 | G09 | hsa-miR-4434     | MIMAT0018950 | AGGAGAAGUAAAGUAGAA       | -3.367605973 |
| plate 29 | G10 | hsa-miR-4471     | MIMAT0018998 | UGGGAACUAGUAGAGGUUUAA    | -13.84608055 |
| plate 29 | G11 | hsa-miR-4481     | MIMAT0019015 | GGAGUGGGCUGGUGGUU        | 6.330969786  |
| plate 29 | G12 |                  |              |                          |              |
| plate 29 | H01 |                  |              |                          |              |
| plate 29 | H02 |                  |              |                          |              |
| plate 29 | H03 |                  |              |                          |              |
| plate 29 | H04 |                  |              |                          |              |
| plate 29 | H05 |                  |              |                          |              |
| plate 29 | H06 |                  |              |                          |              |
| plate 29 | H07 |                  |              |                          |              |
| plate 29 | H08 |                  |              |                          |              |
| plate 29 | H09 |                  |              |                          |              |
| plate 29 | H10 |                  |              |                          |              |
| plate 29 | H11 |                  |              |                          |              |
| plate 29 | H12 |                  |              |                          |              |
| plate 30 | A01 |                  |              |                          |              |
| plate 30 | A02 |                  |              |                          |              |
| plate 30 | A03 |                  |              |                          |              |
| plate 30 | A04 |                  |              |                          |              |
| plate 30 | A05 |                  |              |                          |              |
| plate 30 | A06 |                  |              |                          |              |

|          |     |                  |              |                         |              |
|----------|-----|------------------|--------------|-------------------------|--------------|
| plate 30 | A07 |                  |              |                         |              |
| plate 30 | A08 |                  |              |                         |              |
| plate 30 | A09 |                  |              |                         |              |
| plate 30 | A10 |                  |              |                         |              |
| plate 30 | A11 |                  |              |                         |              |
| plate 30 | A12 |                  |              |                         |              |
| plate 30 | B01 |                  |              |                         |              |
| plate 30 | B02 |                  |              |                         |              |
| plate 30 | B03 |                  |              |                         |              |
| plate 30 | B04 | hsa-miR-4522     | MIMAT0019060 | UGACUCUGCCUGUAGGCCGGU   | 2.605666363  |
| plate 30 | B05 | hsa-miR-4632-5p  | MIMAT0022977 | GAGGGCAGCGUGGGUGUGGCCGA | 8.069696908  |
| plate 30 | B06 | hsa-miR-4646-3p  | MIMAT0019708 | AUUGUCCUCUCCUUCCAG      | -21.07563778 |
| plate 30 | B07 | hsa-miR-4656     | MIMAT0019723 | UGGGCUGAGGGCAGGAGGCCUGU | 10.41115011  |
| plate 30 | B08 | hsa-miR-4677-5p  | MIMAT0019760 | UUGUUCUUUGGUCUUUCAGCCA  | 7.405645426  |
| plate 30 | B09 | hsa-miR-4717-3p  | MIMAT0019830 | ACACAUGGGUGGCUGUGGCCU   | 14.78889991  |
| plate 30 | B10 | hsa-miR-4749-3p  | MIMAT0019886 | CGCCCCUCCUGCCCCACAG     | -0.716510269 |
| plate 30 | B11 | hsa-miR-4777-5p  | MIMAT0019934 | UUCUAGAUGAGAGAUUAUAUA   | 21.25284612  |
| plate 30 | B12 |                  |              |                         |              |
| plate 30 | C01 |                  |              |                         |              |
| plate 30 | C02 | hsa-miR-4799-5p  | MIMAT0019976 | AUCUAAAUGCAGCAUGCCAGUC  | -16.54818851 |
| plate 30 | C03 | hsa-miR-4804-3p  | MIMAT0019985 | UGCUUAACCUUGCCCUCGAAA   | 12.35148551  |
| plate 30 | C04 | hsa-miR-6716-5p  | MIMAT0025844 | UGGGAAUGGGGGUAAGGGCC    | 1.139379276  |
| plate 30 | C05 | hsa-miR-6732-3p  | MIMAT0027366 | UAACCCUGUCCUCUCCUCCAG   | -16.70556488 |
| plate 30 | C06 | hsa-miR-6822-5p  | MIMAT0027544 | CAGGGAACCAGUUGGGGCUU    | 4.54984021   |
| plate 30 | C07 | hsa-miR-203b-3p  | MIMAT0019814 | UUGAACUGUUAAGAACCACUGGA | -15.27958149 |
| plate 30 | C08 | hsa-miR-3166     | MIMAT0015040 | CGCAGACAAUGCCUACUGGCCUA | 1.091398678  |
| plate 30 | C09 | hsa-miR-4456     | MIMAT0018978 | CCUGGUGGCUUCCUUUU       | 3.388709729  |
| plate 30 | C10 | hsa-miR-4670-3p  | MIMAT0019751 | UGAAGUUACAUCAUGGUCGCUU  | 6.701290242  |
| plate 30 | C11 | hsa-miR-4679     | MIMAT0019763 | UCUGUGAUAGAGAUUCUUUGCU  | 7.035235207  |
| plate 30 | C12 |                  |              |                         |              |
| plate 30 | D01 |                  |              |                         |              |
| plate 30 | D02 | hsa-miR-4778-3p  | MIMAT0019937 | UCUUCUCCUUGCAGAGUUGA    | -1.637737758 |
| plate 30 | D03 | hsa-miR-6738-3p  | MIMAT0027378 | CUUCUGCCUGCAUUCUACUCCAG | -55.41631166 |
| plate 30 | D04 | hsa-miR-7844-5p  | MIMAT0030419 | AAAACUAGGACUGUGUGGUGUA  | -1.177124014 |
| plate 30 | D05 | hsa-miR-3167     | MIMAT0015042 | AGGAUUUCAGAAUACUGGUGU   | 6.494014057  |
| plate 30 | D06 | hsa-miR-3622b-5p | MIMAT0018005 | AGGCAUGGGAGGUCAGGUGA    | 4.592063137  |
| plate 30 | D07 | hsa-miR-4289     | MIMAT0016920 | GCAUUGUGCAGGGCUAUCA     | 4.91065431   |
| plate 30 | D08 | hsa-miR-4504     | MIMAT0019040 | UGUGACAAUAGAGAUGAACAUG  | -0.394080648 |
| plate 30 | D09 | hsa-miR-6752-5p  | MIMAT0027404 | GGGGGUGUGGAGCCAGGGGGC   | -1.474603724 |
| plate 30 | D10 | hsa-miR-6769b-5p | MIMAT0027620 | UGGUGGGUGGGGAGGAGAAGUGC | -5.203655831 |
| plate 30 | D11 | hsa-miR-6796-5p  | MIMAT0027492 | UUGUGGGUUGGAGAGCUGGCUG  | 5.179345661  |
| plate 30 | D12 |                  |              |                         |              |
| plate 30 | E01 |                  |              |                         |              |
| plate 30 | E02 | hsa-miR-6816-3p  | MIMAT0027533 | GAAGGACCUGCACCUUCG      | -5.585581394 |
| plate 30 | E03 | hsa-miR-6835-5p  | MIMAT0027570 | AGGGGGUAGAAAGUGGCUGAAG  | 0.133705934  |
| plate 30 | E04 | hsa-miR-7976     | MIMAT0031179 | UGCCUGAGACUUUUGCUC      | -18.01639483 |
| plate 30 | E05 | hsa-miR-555      | MIMAT0003219 | AGGGUAAGCUGAACCUCUGAU   | 2.46748224   |
| plate 30 | E06 | hsa-miR-2682-3p  | MIMAT0013518 | CGCCUCUUCAGCGUCUCUCC    | 3.822454338  |
| plate 30 | E07 | hsa-miR-548ad    | MIMAT0018946 | GAAAACGACAAUGACUUUUGCA  | 8.751021405  |

|          |     |                 |              |                            |              |
|----------|-----|-----------------|--------------|----------------------------|--------------|
| plate 30 | E08 | hsa-miR-1537-5p | MIMAT0026765 | AGCUGUAAUUAGUCAGUUUUCU     | 3.07203778   |
| plate 30 | E09 | hsa-miR-1909-5p | MIMAT0007882 | UGAGUGCCGGUGCCUGCCUG       | -25.98501261 |
| plate 30 | E10 | hsa-miR-3691-3p | MIMAT0019224 | ACCAAGUCUGCGUCAUCCUCUC     | -11.45072974 |
| plate 30 | E11 | hsa-miR-3919    | MIMAT0018193 | GCAGAGAACAAAGGACUCAGU      | -6.076902722 |
| plate 30 | E12 |                 |              |                            |              |
| plate 30 | F01 |                 |              |                            |              |
| plate 30 | F02 | hsa-miR-4428    | MIMAT0018943 | CAAGGAGACGGGAACAUGGAGC     | -4.305459029 |
| plate 30 | F03 | hsa-miR-4438    | MIMAT0018956 | CACAGGCUUAGAAAAGACAGU      | -3.052205799 |
| plate 30 | F04 | hsa-miR-4661-5p | MIMAT0019729 | AACUAGCUCUGUGGAUCCUGAC     | 2.294752086  |
| plate 30 | F05 | hsa-miR-4703-3p | MIMAT0019802 | UGUAGUUGUUAUUGUAUUGCCAC    | 3.672754871  |
| plate 30 | F06 | hsa-miR-4713-3p | MIMAT0019821 | UGGGAUCCAGACAGUGGGAGAA     | 10.2096316   |
| plate 30 | F07 | hsa-miR-4729    | MIMAT0019851 | UCAUUUAUCUGUUGGGAAGCUA     | 9.100320161  |
| plate 30 | F08 | hsa-miR-4797-3p | MIMAT0019973 | UCUCAGUAAGUGGCACUCUGU      | 13.39746255  |
| plate 30 | F09 | hsa-miR-5000-3p | MIMAT0021020 | UCAGGACACUUCUGAACUUGGA     | 0.665330964  |
| plate 30 | F10 | hsa-miR-5197-3p | MIMAT0021131 | AAGAAGAGACUGAGUCAUCGAAU    | -3.51090032  |
| plate 30 | F11 | hsa-miR-6753-5p | MIMAT0027406 | CACCAGGGCAGAGCAGGGCUGA     | 2.653646962  |
| plate 30 | F12 |                 |              |                            |              |
| plate 30 | G01 |                 |              |                            |              |
| plate 30 | G02 | hsa-miR-6765-3p | MIMAT0027431 | UCACCUGGCUGGCCCGCCAG       | -3.343927837 |
| plate 30 | G03 | hsa-miR-6766-5p | MIMAT0027432 | CGGGUGGGAGCAGAUCUUAUUGAG   | -2.441892587 |
| plate 30 | G04 | hsa-miR-6821-5p | MIMAT0027542 | GUGCGUGGUGGCUCGAGGCGGGG    | -0.910351887 |
| plate 30 | G05 | hsa-miR-6864-5p | MIMAT0027628 | UUGAAGGGACAAGUCAGAUUUGCC   | -37.03014636 |
| plate 30 | G06 | hsa-miR-6885-5p | MIMAT0027670 | AGGGGGGCACUCGCGCAAGCAAAGCC | 10.46104993  |
| plate 30 | G07 | hsa-miR-6890-5p | MIMAT0027680 | CAUGGGGUAGGGCAGAGUAGG      | 12.16340156  |
| plate 30 | G08 | hsa-miR-7111-3p | MIMAT0028120 | AUCCUCUCUUCCCUCCUCCAG      | 6.188857451  |
| plate 30 | G09 | hsa-miR-7114-5p | MIMAT0028125 | UCUGUGGAGUGGGGUGCCUGU      | 12.49350808  |
| plate 30 | G10 | hsa-miR-323a-5p | MIMAT0004696 | AGGUGGUCCGUGGCGGUUCGC      | 5.542078985  |
| plate 30 | G11 | hsa-miR-520f-5p | MIMAT0026609 | CCUCUAAAGGGAAGCGCUUUCU     | 4.267714292  |
| plate 30 | G12 |                 |              |                            |              |
| plate 30 | H01 |                 |              |                            |              |
| plate 30 | H02 |                 |              |                            |              |
| plate 30 | H03 |                 |              |                            |              |
| plate 30 | H04 |                 |              |                            |              |
| plate 30 | H05 |                 |              |                            |              |
| plate 30 | H06 |                 |              |                            |              |
| plate 30 | H07 |                 |              |                            |              |
| plate 30 | H08 |                 |              |                            |              |
| plate 30 | H09 |                 |              |                            |              |
| plate 30 | H10 |                 |              |                            |              |
| plate 30 | H11 |                 |              |                            |              |
| plate 30 | H12 |                 |              |                            |              |
| plate 31 | A01 |                 |              |                            |              |
| plate 31 | A02 |                 |              |                            |              |
| plate 31 | A03 |                 |              |                            |              |
| plate 31 | A04 |                 |              |                            |              |
| plate 31 | A05 |                 |              |                            |              |
| plate 31 | A06 |                 |              |                            |              |
| plate 31 | A07 |                 |              |                            |              |
| plate 31 | A08 |                 |              |                            |              |

|          |     |                 |              |                          |              |
|----------|-----|-----------------|--------------|--------------------------|--------------|
| plate 31 | A09 |                 |              |                          |              |
| plate 31 | A10 |                 |              |                          |              |
| plate 31 | A11 |                 |              |                          |              |
| plate 31 | A12 |                 |              |                          |              |
| plate 31 | B01 |                 |              |                          |              |
| plate 31 | B02 |                 |              |                          |              |
| plate 31 | B03 |                 |              |                          |              |
| plate 31 | B04 | hsa-miR-3169    | MIMAT0015044 | UAGGACUGUGCUUGGCACAUAG   | -10.57687695 |
| plate 31 | B05 | hsa-miR-4680-5p | MIMAT0019764 | AGAACUCUUGCAGUCUUGAUGU   | 1.687874359  |
| plate 31 | B06 | hsa-miR-5587-3p | MIMAT0022290 | GCCCCGGGCAGUGUGAUCAUC    | -38.61580232 |
| plate 31 | B07 | hsa-miR-563     | MIMAT0003227 | AGGUUGACAUACGUUUC        | 3.859917301  |
| plate 31 | B08 | hsa-miR-578     | MIMAT0003243 | CUUCUUGUGCUCUAGGAUUGU    | 0.442595323  |
| plate 31 | B09 | hsa-miR-4257    | MIMAT0016878 | CCAGAGGUGGGACUGAG        | -9.325841619 |
| plate 31 | B10 | hsa-miR-487b-5p | MIMAT0026614 | GUGGUUAUCCUGUCCUGUUCG    | -25.05972159 |
| plate 31 | B11 | hsa-miR-487a-5p | MIMAT0026559 | GUGGUUAUCCUGCUGUGUUCG    | -3.204978558 |
| plate 31 | B12 |                 |              |                          |              |
| plate 31 | C01 |                 |              |                          |              |
| plate 31 | C02 | hsa-miR-520g-5p | MIMAT0026611 | UCUAGAGGAAGCACUUCUGUUU   | 6.14900496   |
| plate 31 | C03 | hsa-miR-1266-3p | MIMAT0026742 | CCUGUUCUAUGCCCUGAGGGA    | -7.662271627 |
| plate 31 | C04 | hsa-miR-3136-3p | MIMAT0019203 | UGGCCCAACCUAUUCAGUUGU    | 4.140057115  |
| plate 31 | C05 | hsa-miR-3591-5p | MIMAT0019876 | UUUAGUGUGAUAAUGGCGUUUGA  | -10.55385176 |
| plate 31 | C06 | hsa-miR-3680-3p | MIMAT0018107 | UUUUGCAUGACCCUGGGAGUAGG  | -48.8255554  |
| plate 31 | C07 | hsa-miR-3685    | MIMAT0018113 | UUUCCUACCCUACCUGAAGACU   | -43.63529378 |
| plate 31 | C08 | hsa-miR-3907    | MIMAT0018179 | AGGUGCUCCAGGCUGGCUCACA   | 10.36837106  |
| plate 31 | C09 | hsa-miR-3921    | MIMAT0018196 | UCUCUGAGUACCAUUGCCUUGU   | -56.00365845 |
| plate 31 | C10 | hsa-miR-3922-5p | MIMAT0019227 | UCAAGGCCAGAGGUCCCACAGCA  | -16.2487488  |
| plate 31 | C11 | hsa-miR-3927-3p | MIMAT0018202 | CAGGUAGAUUUUGAUAGGCAU    | -15.52729285 |
| plate 31 | C12 |                 |              |                          |              |
| plate 31 | D01 |                 |              |                          |              |
| plate 31 | D02 | hsa-miR-4288    | MIMAT0016918 | UUGUCUGCUGAGUUUCC        | -1.762066639 |
| plate 31 | D03 | hsa-miR-4433-5p | MIMAT0020956 | CGUCCACCCCCACUCCUGU      | -32.57936495 |
| plate 31 | D04 | hsa-miR-4452    | MIMAT0018974 | UUGAAUUCUUGGCCUUAAGUGAU  | -9.224147029 |
| plate 31 | D05 | hsa-miR-4662b   | MIMAT0019736 | AAAGAUGGACAAUUGGCUAAAU   | -4.358156834 |
| plate 31 | D06 | hsa-miR-4676-3p | MIMAT0019759 | CACUGUUUACACCUGGCUCUU    | -48.78142379 |
| plate 31 | D07 | hsa-miR-4684-3p | MIMAT0019770 | UGUUGCAAGUCGGUGGAGACGU   | -11.81064339 |
| plate 31 | D08 | hsa-miR-4712-3p | MIMAT0019819 | AAUGAGAGACCUGUACUGUAU    | 0.772623049  |
| plate 31 | D09 | hsa-miR-4714-3p | MIMAT0019823 | CCAACCUAGGUGGUCAGAGUUG   | -32.64844052 |
| plate 31 | D10 | hsa-miR-4725-5p | MIMAT0019843 | AGACCCUGCAGCCUUCACC      | -11.36548972 |
| plate 31 | D11 | hsa-miR-4730    | MIMAT0019852 | CUGGCGGAGCCAUUCAUGCCA    | -8.166907045 |
| plate 31 | D12 |                 |              |                          |              |
| plate 31 | E01 |                 |              |                          |              |
| plate 31 | E02 | hsa-miR-4751    | MIMAT0019888 | AGAGGACCCGUAGCUGCUAGAAGG | -48.91189987 |
| plate 31 | E03 | hsa-miR-4757-3p | MIMAT0019902 | CAUGACGUCACAGAGGCUUCGC   | -23.40958296 |
| plate 31 | E04 | hsa-miR-4779    | MIMAT0019938 | UAGGAGGGAAUAGUAAAAGCAG   | -23.82403638 |
| plate 31 | E05 | hsa-miR-4793-3p | MIMAT0019966 | UCUGCACUGUGAGUUGGCUGGCU  | -7.982705524 |
| plate 31 | E06 | hsa-miR-4795-5p | MIMAT0019968 | AGAAGUGGCUAAUAAUUAUGA    | -0.111928008 |
| plate 31 | E07 | hsa-miR-4999-3p | MIMAT0021018 | UCACUACCUGACAAUACAGU     | -30.09456318 |
| plate 31 | E08 | hsa-miR-5094    | MIMAT0021086 | AAUCAGUGAAUGCCUUGAACCU   | -29.37694475 |
| plate 31 | E09 | hsa-miR-5186    | MIMAT0021116 | AGAGAUUGGUAGAAAUCAGGU    | -1.950105692 |

|          |     |                  |              |                           |              |
|----------|-----|------------------|--------------|---------------------------|--------------|
| plate 31 | E10 | hsa-miR-5192     | MIMAT0021123 | AGGAGAGUGGAUUCAGGUGGU     | -13.12307924 |
| plate 31 | E11 | hsa-miR-5195-3p  | MIMAT0021127 | AUCCAGUUCUCUGAGGGGGCU     | 2.854483996  |
| plate 31 | E12 |                  |              |                           |              |
| plate 31 | F01 |                  |              |                           |              |
| plate 31 | F02 | hsa-miR-5682     | MIMAT0022470 | GUAGCACCUUGCAGGAUAAGGU    | -41.95253613 |
| plate 31 | F03 | hsa-miR-5694     | MIMAT0022487 | CAGAUCAUGGGACUGUCUCAG     | -49.09993892 |
| plate 31 | F04 | hsa-miR-6081     | MIMAT0023706 | AGGAGCAGUGCCGGCCAAGGCGCC  | -21.36225979 |
| plate 31 | F05 | hsa-miR-6717-5p  | MIMAT0025846 | AGGCGAUGUGGGGAUGUAGAGA    | 3.556752297  |
| plate 31 | F06 | hsa-miR-6719-3p  | MIMAT0025850 | UCUGACAUCAGUGAUUCUCCUG    | -62.40466132 |
| plate 31 | F07 | hsa-miR-6743-5p  | MIMAT0027387 | AAGGGGCAGGGACGGGUGGCC     | -1.992318541 |
| plate 31 | F08 | hsa-miR-6768-5p  | MIMAT0027436 | CACACAGGAAAAGCGGGGCCUG    | -16.45597552 |
| plate 31 | F09 | hsa-miR-6774-5p  | MIMAT0027448 | ACUUGGGCAGGAGGGACCCUGUAUG | -11.14675041 |
| plate 31 | F10 | hsa-miR-6780b-3p | MIMAT0027573 | UCCCUUGUCUCCUUUCCCUAG     | -11.83174982 |
| plate 31 | F11 | hsa-miR-6795-5p  | MIMAT0027490 | UGGGGGGACAGGAUGAGAGGCUGU  | -9.544580926 |
| plate 31 | F12 |                  |              |                           |              |
| plate 31 | G01 |                  |              |                           |              |
| plate 31 | G02 | hsa-miR-6797-3p  | MIMAT0027495 | UGCAUGACCCUUCCCUCCCCAC    | -18.1425707  |
| plate 31 | G03 | hsa-miR-6810-3p  | MIMAT0027521 | UCCCUUGCUCCCUUGUCCCCAG    | -33.64811753 |
| plate 31 | G04 | hsa-miR-6815-5p  | MIMAT0027530 | UAGGUGGCGCCGGAGGAGUCAUU   | -10.40994432 |
| plate 31 | G05 | hsa-miR-6830-5p  | MIMAT0027560 | CCAAGGAAGGAGGCUGGACAUC    | -37.11340866 |
| plate 31 | G06 | hsa-miR-6836-3p  | MIMAT0027575 | AUGCCUCCCCGGCCCCGAG       | -16.12978532 |
| plate 31 | G07 | hsa-miR-6850-3p  | MIMAT0027601 | CCCGGCCGGAACGCCGCACU      | 0.404220006  |
| plate 31 | G08 | hsa-miR-6857-3p  | MIMAT0027615 | UGACUGAGCUUCUCCCCACAG     | -42.20773199 |
| plate 31 | G09 | hsa-miR-6870-5p  | MIMAT0027640 | UGGGGGAGAUGGGGGUUGA       | -4.189305439 |
| plate 31 | G10 | hsa-miR-1251-5p  | MIMAT0005903 | ACUCUAGCUGCCAAAGGCGCU     | -34.82623976 |
| plate 31 | G11 | hsa-miR-3689a-3p | MIMAT0018118 | CUGGGAGGUGUGAUUCGUGGU     | -19.74665895 |
| plate 31 | G12 |                  |              |                           |              |
| plate 31 | H01 |                  |              |                           |              |
| plate 31 | H02 |                  |              |                           |              |
| plate 31 | H03 |                  |              |                           |              |
| plate 31 | H04 |                  |              |                           |              |
| plate 31 | H05 |                  |              |                           |              |
| plate 31 | H06 |                  |              |                           |              |
| plate 31 | H07 |                  |              |                           |              |
| plate 31 | H08 |                  |              |                           |              |
| plate 31 | H09 |                  |              |                           |              |
| plate 31 | H10 |                  |              |                           |              |
| plate 31 | H11 |                  |              |                           |              |
| plate 31 | H12 |                  |              |                           |              |
| plate 32 | A01 |                  |              |                           |              |
| plate 32 | A02 |                  |              |                           |              |
| plate 32 | A03 |                  |              |                           |              |
| plate 32 | A04 |                  |              |                           |              |
| plate 32 | A05 |                  |              |                           |              |
| plate 32 | A06 |                  |              |                           |              |
| plate 32 | A07 |                  |              |                           |              |
| plate 32 | A08 |                  |              |                           |              |
| plate 32 | A09 |                  |              |                           |              |
| plate 32 | A10 |                  |              |                           |              |

|          |     |                  |              |                          |              |
|----------|-----|------------------|--------------|--------------------------|--------------|
| plate 32 | A11 |                  |              |                          |              |
| plate 32 | A12 |                  |              |                          |              |
| plate 32 | B01 |                  |              |                          |              |
| plate 32 | B02 |                  |              |                          |              |
| plate 32 | B03 |                  |              |                          |              |
| plate 32 | B04 | hsa-miR-4467     | MIMAT0018994 | UGGCGGCGGUAGUUAUGGGCUU   | 6.143216834  |
| plate 32 | B05 | hsa-miR-6745     | MIMAT0027391 | UGGGUGGAAGAAGGUCUGGUU    | 8.679036029  |
| plate 32 | B06 | hsa-miR-6861-3p  | MIMAT0027624 | UGGACCUCUCCUCCCCAG       | 4.438283077  |
| plate 32 | B07 | hsa-miR-548at-3p | MIMAT0022278 | CAAACCGCAGUAACUUUUUGU    | 15.8206942   |
| plate 32 | B08 | hsa-miR-548ao-3p | MIMAT0021030 | AAAGACCGUGACUACUUUUGCA   | 10.86235837  |
| plate 32 | B09 | hsa-miR-3193     | MIMAT0015077 | UCCUGCGUAGGAUCUGAGGAGU   | -11.03740783 |
| plate 32 | B10 | hsa-miR-3681-3p  | MIMAT0018109 | ACACAGUGCUUCAUCCACUACU   | 12.43060968  |
| plate 32 | B11 | hsa-miR-4446-5p  | MIMAT0019233 | AUUUCCCUGCCAUUCCCUUGGC   | -2.286133925 |
| plate 32 | B12 |                  |              |                          |              |
| plate 32 | C01 |                  |              |                          |              |
| plate 32 | C02 | hsa-miR-4477a    | MIMAT0019004 | CUAUUAAGGACAUUUGUGAUUC   | 19.22516636  |
| plate 32 | C03 | hsa-miR-4641     | MIMAT0019701 | UGCCCAUGCCAUACUUUUGCCUCA | -53.89814759 |
| plate 32 | C04 | hsa-miR-5191     | MIMAT0021122 | AGGAUAGGAAGAAUGAAGUGCU   | 11.40908818  |
| plate 32 | C05 | hsa-miR-5195-5p  | MIMAT0021126 | AACCCCUAAGGCAACUGGAUGG   | -59.69456268 |
| plate 32 | C06 | hsa-miR-6508-3p  | MIMAT0025473 | UGGGCCAUGCAUUUCUAGAACU   | -50.42713267 |
| plate 32 | C07 | hsa-miR-6780b-5p | MIMAT0027572 | UGGGGAAGGCUUGGCAGGGAAGA  | 10.76704035  |
| plate 32 | C08 | hsa-miR-6814-5p  | MIMAT0027528 | UCCCAAGGGUGAGAUGCUGCCA   | -27.31341047 |
| plate 32 | C09 | hsa-miR-6820-3p  | MIMAT0027541 | UGUGACUUCUCCCCUGCCACAG   | -52.00077933 |
| plate 32 | C10 | hsa-miR-410-5p   | MIMAT0026558 | AGGUUGUCUGUGAUGAGAUUCG   | 13.0115101   |
| plate 32 | C11 | hsa-miR-513b-3p  | MIMAT0026749 | AAAUGUCACCUUUUUGAGAGGA   | 11.86409688  |
| plate 32 | C12 |                  |              |                          |              |
| plate 32 | D01 |                  |              |                          |              |
| plate 32 | D02 | hsa-miR-552-5p   | MIMAT0026615 | GUUUAAACUUUUGCCUGUUGG    | 15.90522151  |
| plate 32 | D03 | hsa-miR-1321     | MIMAT0005952 | CAGGGAGGUGAAUGUGAU       | 11.74539896  |
| plate 32 | D04 | hsa-miR-3189-5p  | MIMAT0019217 | UGCCCAUCUGUGCCCUGGGUAGGA | 9.520712188  |
| plate 32 | D05 | hsa-miR-3191-5p  | MIMAT0022732 | CUCUCUGGCCGUCUACCUUCCA   | -38.11312271 |
| plate 32 | D06 | hsa-miR-3201     | MIMAT0015086 | GGGAUAUGAAGAAAAAU        | 8.218631977  |
| plate 32 | D07 | hsa-miR-3689d    | MIMAT0019008 | GGGAGGUGUGAUCUCACACUCG   | 14.4143037   |
| plate 32 | D08 | hsa-miR-3908     | MIMAT0018182 | GAGCAUUGUAGGUAGACUGUUU   | 15.0617469   |
| plate 32 | D09 | hsa-miR-3935     | MIMAT0018350 | UGUAGAUACGAGCACCAGCCAC   | -54.42509442 |
| plate 32 | D10 | hsa-miR-4309     | MIMAT0016859 | CUGGAGUCUAGGAUUCCA       | -38.02859541 |
| plate 32 | D11 | hsa-miR-4474-3p  | MIMAT0019001 | UUGUGGCUGGUCAUGAGGCUAA   | -53.57082909 |
| plate 32 | D12 |                  |              |                          |              |
| plate 32 | E01 |                  |              |                          |              |
| plate 32 | E02 | hsa-miR-4642     | MIMAT0019702 | AUGGCAUCGUCCCCUGGUGGCU   | -18.56933038 |
| plate 32 | E03 | hsa-miR-4693-3p  | MIMAT0019785 | UGAGAGUGGAAUUCACAGUAUUU  | 9.536898267  |
| plate 32 | E04 | hsa-miR-4699-3p  | MIMAT0019795 | AAUUUACUCUGCAAUCUUCUCC   | -5.820094719 |
| plate 32 | E05 | hsa-miR-4699-5p  | MIMAT0019794 | AGAAGAUUGCAGAGUAAGUUC    | 6.483124513  |
| plate 32 | E06 | hsa-miR-4733-5p  | MIMAT0019857 | AAUCCCAUUGCUAGACCCGGUG   | -44.31598825 |
| plate 32 | E07 | hsa-miR-4765     | MIMAT0019916 | UGAGUGAUUGAUAGCUAUGUUC   | 16.30447815  |
| plate 32 | E08 | hsa-miR-4773     | MIMAT0019928 | CAGAACAGGAGCAUAGAAAGGC   | -13.47970745 |
| plate 32 | E09 | hsa-miR-5004-3p  | MIMAT0021028 | CUUGGAUUUUCUGGGCCUCAG    | -52.45398957 |
| plate 32 | E10 | hsa-miR-5093     | MIMAT0021085 | AGGAAAUGAGGCUGGCUAGGAGC  | -12.58587615 |
| plate 32 | E11 | hsa-miR-6499-3p  | MIMAT0025451 | AGCAGUGUUUGUUUUGCCACA    | 0.623763563  |

|          |     |                  |              |                          |              |
|----------|-----|------------------|--------------|--------------------------|--------------|
| plate 32 | E12 |                  |              |                          |              |
| plate 32 | F01 |                  |              |                          |              |
| plate 32 | F02 | hsa-miR-6726-3p  | MIMAT0027354 | CUCGCCCUGUCUCCCGCUAG     | -8.258797434 |
| plate 32 | F03 | hsa-miR-6731-3p  | MIMAT0027364 | UCUAUCCCCACUCUCCCCAG     | -26.791859   |
| plate 32 | F04 | hsa-miR-6732-5p  | MIMAT0027365 | UAGGGGGUGGCAGGCUGGCC     | -8.149091781 |
| plate 32 | F05 | hsa-miR-6750-5p  | MIMAT0027400 | CAGGGAACAGCUGGGUGAGCUGCU | -4.982015467 |
| plate 32 | F06 | hsa-miR-6754-5p  | MIMAT0027408 | CCAGGGAGGCUGGUUUGGAGGA   | -31.57574486 |
| plate 32 | F07 | hsa-miR-6762-3p  | MIMAT0027425 | UGGCUGCUUCCCUUGGUCUCCAG  | 29.83963791  |
| plate 32 | F08 | hsa-miR-6766-3p  | MIMAT0027433 | UGAUUGUCUUCCCCCACCCUCA   | -35.34170613 |
| plate 32 | F09 | hsa-miR-6782-5p  | MIMAT0027464 | UAGGGGUGGGGAAUUCAGGGGUGU | -20.43972184 |
| plate 32 | F10 | hsa-miR-6785-3p  | MIMAT0027471 | ACAUCGCCCCACCUUCCCCAG    | -31.79335771 |
| plate 32 | F11 | hsa-miR-6790-5p  | MIMAT0027480 | GUGAGUGUGGAUUUGGCGGGGUU  | 9.029734428  |
| plate 32 | F12 |                  |              |                          |              |
| plate 32 | G01 |                  |              |                          |              |
| plate 32 | G02 | hsa-miR-6794-5p  | MIMAT0027488 | CAGGGGGACUGGGGGUGAGC     | 5.914813261  |
| plate 32 | G03 | hsa-miR-6838-3p  | MIMAT0027579 | AAGUCCUGCUUCUGUUGCAG     | -36.89736826 |
| plate 32 | G04 | hsa-miR-6873-5p  | MIMAT0027646 | CAGAGGGAAUACAGAGGGCAAU   | -42.81248127 |
| plate 32 | G05 | hsa-miR-6895-5p  | MIMAT0027690 | CAGGGCCAGGCACAGAGUAAG    | -23.13920029 |
| plate 32 | G06 | hsa-miR-7106-5p  | MIMAT0028109 | UGGGAGGAGGGGAUCUUGGG     | -1.858102032 |
| plate 32 | G07 | hsa-miR-7151-3p  | MIMAT0028213 | CUACAGGCUGGAAUGGGCUCA    | -30.38157185 |
| plate 32 | G08 | hsa-miR-6886-5p  | MIMAT0027672 | CCC GCAGGUGAGAUGAGGGCU   | 3.551645585  |
| plate 32 | G09 | hsa-miR-489-5p   | MIMAT0026605 | GGUCGUAUGUGUGACGCCAUUU   | 6.538876566  |
| plate 32 | G10 | hsa-miR-548ah-5p | MIMAT0018972 | AAAAGUGAUUGCAGUGUUUG     | -1.09555782  |
| plate 32 | G11 | hsa-miR-548ao-5p | MIMAT0021029 | AGAAGUAACUACGGUUUUUGCA   | 7.675499071  |
| plate 32 | G12 |                  |              |                          |              |
| plate 32 | H01 |                  |              |                          |              |
| plate 32 | H02 |                  |              |                          |              |
| plate 32 | H03 |                  |              |                          |              |
| plate 32 | H04 |                  |              |                          |              |
| plate 32 | H05 |                  |              |                          |              |
| plate 32 | H06 |                  |              |                          |              |
| plate 32 | H07 |                  |              |                          |              |
| plate 32 | H08 |                  |              |                          |              |
| plate 32 | H09 |                  |              |                          |              |
| plate 32 | H10 |                  |              |                          |              |
| plate 32 | H11 |                  |              |                          |              |
| plate 32 | H12 |                  |              |                          |              |
| plate 33 | A01 |                  |              |                          |              |
| plate 33 | A02 |                  |              |                          |              |
| plate 33 | A03 |                  |              |                          |              |
| plate 33 | A04 |                  |              |                          |              |
| plate 33 | A05 |                  |              |                          |              |
| plate 33 | A06 |                  |              |                          |              |
| plate 33 | A07 |                  |              |                          |              |
| plate 33 | A08 |                  |              |                          |              |
| plate 33 | A09 |                  |              |                          |              |
| plate 33 | A10 |                  |              |                          |              |
| plate 33 | A11 |                  |              |                          |              |
| plate 33 | A12 |                  |              |                          |              |

|          |     |                  |              |                          |              |
|----------|-----|------------------|--------------|--------------------------|--------------|
| plate 33 | B01 |                  |              |                          |              |
| plate 33 | B02 |                  |              |                          |              |
| plate 33 | B03 |                  |              |                          |              |
| plate 33 | B04 | hsa-miR-548m     | MIMAT0005917 | CAAAGGUAAUUUGUGGUUUUUG   | 29.1789309   |
| plate 33 | B05 | hsa-miR-581      | MIMAT0003246 | UCUUGUGUUCUCUAGAUCAGU    | 25.93273197  |
| plate 33 | B06 | hsa-miR-598-5p   | MIMAT0026620 | GCGGUGAUCCCGAUGGUGUGAGC  | 31.88089151  |
| plate 33 | B07 | hsa-miR-670-5p   | MIMAT0010357 | GUCCUGAGUGUAUGUGGUG      | 11.20175814  |
| plate 33 | B08 | hsa-miR-1227-5p  | MIMAT0022941 | GUGGGGCCAGGCGGUGG        | 31.78858253  |
| plate 33 | B09 | hsa-miR-1292-3p  | MIMAT0022948 | UCGCGCCCCGGCUCCCGUUC     | 42.76950428  |
| plate 33 | B10 | hsa-miR-1976     | MIMAT0009451 | CCUCCUGCCCUCCUUGCUGU     | -77.02254412 |
| plate 33 | B11 | hsa-miR-2117     | MIMAT0011162 | UGUUCUCUUGCCAAGGACAG     | 18.67301576  |
| plate 33 | B12 |                  |              |                          |              |
| plate 33 | C01 |                  |              |                          |              |
| plate 33 | C02 | hsa-miR-2276-3p  | MIMAT0011775 | UCUGCAAGUGUCAGAGGCGAGG   | 13.19986282  |
| plate 33 | C03 | hsa-miR-3120-5p  | MIMAT0019198 | CCUGUCUGUGCCUGCUGUACA    | 38.38098179  |
| plate 33 | C04 | hsa-miR-3124-3p  | MIMAT0019200 | ACUUUCCUCACUCCCGUGAAGU   | 40.82716961  |
| plate 33 | C05 | hsa-miR-3127-3p  | MIMAT0019201 | UCCCUUUCUGCAGGCCUGCUGG   | -120.6885352 |
| plate 33 | C06 | hsa-miR-3190-5p  | MIMAT0015073 | UCUGGCCAGCUACGUCCCA      | -84.46495518 |
| plate 33 | C07 | hsa-miR-3682-5p  | MIMAT0019222 | CUACUUCUACCUGUGUUAUCAU   | 35.59055842  |
| plate 33 | C08 | hsa-miR-3692-3p  | MIMAT0018122 | GUUCCACACUGACACUGCAGAAGU | 5.328599649  |
| plate 33 | C09 | hsa-miR-3976     | MIMAT0019361 | UAUAGAGAGCAGGAAGAUUAUGU  | 25.81349955  |
| plate 33 | C10 | hsa-miR-4253     | MIMAT0016882 | AGGGCAUGUCCAGGGGGU       | 40.21562265  |
| plate 33 | C11 | hsa-miR-4256     | MIMAT0016877 | AUCUGACCUGAUGAAGGU       | 14.57295881  |
| plate 33 | C12 |                  |              |                          |              |
| plate 33 | D01 |                  |              |                          |              |
| plate 33 | D02 | hsa-miR-4266     | MIMAT0016892 | CUAGGAGGCCUUGGCC         | -12.33126101 |
| plate 33 | D03 | hsa-miR-4285     | MIMAT0016913 | GCGGCGAGUCCGACUCAU       | 45.19838417  |
| plate 33 | D04 | hsa-miR-4299     | MIMAT0016851 | GCUGGUGACAUGAGAGGC       | -27.12762036 |
| plate 33 | D05 | hsa-miR-4313     | MIMAT0016865 | AGCCCCUJGGCCCCAAACCC     | -13.34281352 |
| plate 33 | D06 | hsa-miR-4432     | MIMAT0018948 | AAAGACUCUGCAAGAUGCCU     | 60.92937188  |
| plate 33 | D07 | hsa-miR-4460     | MIMAT0018982 | AUAGUGGUUGUGAAUUUACCUU   | 35.22324562  |
| plate 33 | D08 | hsa-miR-4482-5p  | MIMAT0019016 | AACCCAGUGGGCUAUGGAAUUG   | 34.43092693  |
| plate 33 | D09 | hsa-miR-4482-3p  | MIMAT0020958 | UUUCUAUUUCUCAGUGGGGUC    | -19.80444173 |
| plate 33 | D10 | hsa-miR-4494     | MIMAT0019029 | CCAGACUGUGGCUGACCAGAGG   | -27.74301352 |
| plate 33 | D11 | hsa-miR-4501     | MIMAT0019037 | UAUGUGACCUCGGAUGAAUCA    | 32.91552126  |
| plate 33 | D12 |                  |              |                          |              |
| plate 33 | E01 |                  |              |                          |              |
| plate 33 | E02 | hsa-miR-4520a-5p | MIMAT0019235 | CCUGCGUGUUUCUGUCCAA      | 34.34823347  |
| plate 33 | E03 | hsa-miR-4655-3p  | MIMAT0019722 | ACCCUCGUCAGGUCCCCGGGG    | 29.21931608  |
| plate 33 | E04 | hsa-miR-4659b-5p | MIMAT0019733 | UUGCCAUGUCUAAGAAGAA      | 27.81352732  |
| plate 33 | E05 | hsa-miR-4659b-3p | MIMAT0019734 | UUUCUUCUAGACAUGGCAGCU    | -115.5673102 |
| plate 33 | E06 | hsa-miR-4663     | MIMAT0019735 | AGCUGAGCUCCAUGGACGUGCAGU | -95.12279551 |
| plate 33 | E07 | hsa-miR-4664-3p  | MIMAT0019738 | CUUCCGGUCUGUGAGCCCCGUC   | 43.09450879  |
| plate 33 | E08 | hsa-miR-4686     | MIMAT0019773 | UAUCUGCUGGGCUUUCUGGUGUU  | 29.51739714  |
| plate 33 | E09 | hsa-miR-4697-3p  | MIMAT0019792 | UGUCAGUGACUCCUGCCCCUUGGU | -96.72089463 |
| plate 33 | E10 | hsa-miR-4701-5p  | MIMAT0019798 | UUGGCCACCACACCUACCCCUU   | -111.6191785 |
| plate 33 | E11 | hsa-miR-4721     | MIMAT0019835 | UGAGGGCUCCAGGUGACGGUGG   | 13.97102738  |
| plate 33 | E12 |                  |              |                          |              |
| plate 33 | F01 |                  |              |                          |              |

|          |     |                  |              |                           |              |
|----------|-----|------------------|--------------|---------------------------|--------------|
| plate 33 | F02 | hsa-miR-4736     | MIMAT0019862 | AGGCAGGUUAUCUGGGCUG       | 13.10755384  |
| plate 33 | F03 | hsa-miR-4744     | MIMAT0019875 | UCUAAAGACUAGACUUCGCUAUG   | 23.31154172  |
| plate 33 | F04 | hsa-miR-4753-3p  | MIMAT0019891 | UUCUCUUUCUUUAGCCUUGUGU    | 30.9212628   |
| plate 33 | F05 | hsa-miR-4756-3p  | MIMAT0019900 | CCAGAGAUGGUUGCCUCCUAU     | -44.9855607  |
| plate 33 | F06 | hsa-miR-4761-5p  | MIMAT0019908 | ACAAGGUGUGCAUGCCUGACC     | -92.52083629 |
| plate 33 | F07 | hsa-miR-4768-3p  | MIMAT0019921 | CCAGGAGAUCCAGAGAGAAU      | 22.57499303  |
| plate 33 | F08 | hsa-miR-4796-5p  | MIMAT0019970 | UGUCUAUACUCUGUCACUUUAC    | 12.07292409  |
| plate 33 | F09 | hsa-miR-4797-5p  | MIMAT0019972 | GACAGAGUGCCACUUACUGAA     | 49.04843764  |
| plate 33 | F10 | hsa-miR-4802-3p  | MIMAT0019982 | UACAUGGAUGGAAACCUUCAAGC   | 17.28453493  |
| plate 33 | F11 | hsa-miR-5000-5p  | MIMAT0021019 | CAGUUCAGAAGUGUCCUGAGU     | 30.87895452  |
| plate 33 | F12 |                  |              |                           |              |
| plate 33 | G01 |                  |              |                           |              |
| plate 33 | G02 | hsa-miR-5002-5p  | MIMAT0021023 | AAUUUGGUUUUCUGAGGCACUUAGU | 7.492091236  |
| plate 33 | G03 | hsa-miR-5003-5p  | MIMAT0021025 | UCACAACAACCUUGCAGGGUAGA   | -46.53173602 |
| plate 33 | G04 | hsa-miR-5009-3p  | MIMAT0021042 | UCCUAAAUCUGAAAGUCCAAAA    | 26.5288941   |
| plate 33 | G05 | hsa-miR-6074     | MIMAT0023699 | GAUAUUCAGAGGCUAGGUGG      | 9.926740435  |
| plate 33 | G06 | hsa-miR-6505-3p  | MIMAT0025467 | UGACUUCUACCUCUCCAAAG      | 24.5192508   |
| plate 33 | G07 | hsa-miR-6506-5p  | MIMAT0025468 | ACUGGGAUGUCACUGAAUAUGGU   | 15.08258128  |
| plate 33 | G08 | hsa-miR-6512-3p  | MIMAT0025481 | UUCAGCCCUUCUAAUGGUAGG     | -72.43786506 |
| plate 33 | G09 | hsa-miR-6715a-3p | MIMAT0025841 | CCAACCAGUCGUGCCUGUGG      | 31.41742353  |
| plate 33 | G10 | hsa-miR-6733-3p  | MIMAT0027368 | UCAGUGUCUGGAUUCCUAG       | 35.38286322  |
| plate 33 | G11 | hsa-miR-6735-3p  | MIMAT0027372 | AGGCCUGUGGCCUCCUCCUCAG    | 23.8807804   |
| plate 33 | G12 |                  |              |                           |              |
| plate 33 | H01 |                  |              |                           |              |
| plate 33 | H02 |                  |              |                           |              |
| plate 33 | H03 |                  |              |                           |              |
| plate 33 | H04 |                  |              |                           |              |
| plate 33 | H05 |                  |              |                           |              |
| plate 33 | H06 |                  |              |                           |              |
| plate 33 | H07 |                  |              |                           |              |
| plate 33 | H08 |                  |              |                           |              |
| plate 33 | H09 |                  |              |                           |              |
| plate 33 | H10 |                  |              |                           |              |
| plate 33 | H11 |                  |              |                           |              |
| plate 33 | H12 |                  |              |                           |              |
| plate 34 | A01 |                  |              |                           |              |
| plate 34 | A02 |                  |              |                           |              |
| plate 34 | A03 |                  |              |                           |              |
| plate 34 | A04 |                  |              |                           |              |
| plate 34 | A05 |                  |              |                           |              |
| plate 34 | A06 |                  |              |                           |              |
| plate 34 | A07 |                  |              |                           |              |
| plate 34 | A08 |                  |              |                           |              |
| plate 34 | A09 |                  |              |                           |              |
| plate 34 | A10 |                  |              |                           |              |
| plate 34 | A11 |                  |              |                           |              |
| plate 34 | A12 |                  |              |                           |              |
| plate 34 | B01 |                  |              |                           |              |
| plate 34 | B02 |                  |              |                           |              |

|          |     |                 |              |                          |              |
|----------|-----|-----------------|--------------|--------------------------|--------------|
| plate 34 | B03 |                 |              |                          |              |
| plate 34 | B04 | hsa-miR-6737-3p | MIMAT0027376 | UCUGUGCUUCACCCCUACCCAG   | -54.84627629 |
| plate 34 | B05 | hsa-miR-6742-5p | MIMAT0027385 | AGUGGGGUGGGACCCAGCUGUU   | -34.87080784 |
| plate 34 | B06 | hsa-miR-6746-3p | MIMAT0027393 | CAGCCGCCGUCUGUCUCCACAG   | 2.776702022  |
| plate 34 | B07 | hsa-miR-6762-5p | MIMAT0027424 | CGGGGCAUGGAGCAGCCUGUGU   | 5.534752813  |
| plate 34 | B08 | hsa-miR-6786-3p | MIMAT0027473 | UGACGCCCUUCUGAUUCUGCCU   | -39.50097595 |
| plate 34 | B09 | hsa-miR-6789-3p | MIMAT0027479 | CGGCGCCCGUGUCUCCUCCAG    | -5.826178298 |
| plate 34 | B10 | hsa-miR-6798-3p | MIMAT0027497 | CUACCCCAUCCCUUGUAG       | -13.77393413 |
| plate 34 | B11 | hsa-miR-6799-3p | MIMAT0027499 | UGCCUGCAUGGUGUCCCCACAG   | -70.15427418 |
| plate 34 | B12 |                 |              |                          |              |
| plate 34 | C01 |                 |              |                          |              |
| plate 34 | C02 | hsa-miR-6801-3p | MIMAT0027503 | ACCCUGCCACUCACUGGCC      | -83.6857423  |
| plate 34 | C03 | hsa-miR-6809-5p | MIMAT0027518 | UGGCAAGGAAAGAAGAGGAUCA   | -78.99029488 |
| plate 34 | C04 | hsa-miR-6826-3p | MIMAT0027553 | CUCCCCUCUUUCCUGUUCAG     | -50.18113713 |
| plate 34 | C05 | hsa-miR-6836-5p | MIMAT0027574 | CGCAGGGCCUGGCGCAGGCAU    | -14.40341318 |
| plate 34 | C06 | hsa-miR-6840-3p | MIMAT0027583 | GCCCAGGACUUUGUGCGGGGUG   | -29.39667153 |
| plate 34 | C07 | hsa-miR-6853-3p | MIMAT0027607 | UGUUAUUGGAACCCUGCGCAG    | -73.14779676 |
| plate 34 | C08 | hsa-miR-6857-5p | MIMAT0027614 | UUGGGGAUUGGGUCAGGCCAGU   | -9.474825371 |
| plate 34 | C09 | hsa-miR-6859-3p | MIMAT0027619 | UGACCCCAUGUCGCCUCUGUAG   | -13.54312514 |
| plate 34 | C10 | hsa-miR-6860    | MIMAT0027622 | ACUGGGCAGGGCUGUGGUGAGU   | 2.779033426  |
| plate 34 | C11 | hsa-miR-6869-5p | MIMAT0027638 | GUGAGUAGUGGCGCGGGCGGC    | -3.256971221 |
| plate 34 | C12 |                 |              |                          |              |
| plate 34 | D01 |                 |              |                          |              |
| plate 34 | D02 | hsa-miR-6883-5p | MIMAT0027666 | AGGGAGGGUGUGGUAUGGAUGU   | 20.53733679  |
| plate 34 | D03 | hsa-miR-6887-3p | MIMAT0027675 | UCCCUCCACUUUCCUCCUAG     | -12.63854044 |
| plate 34 | D04 | hsa-miR-6891-3p | MIMAT0027683 | CCUCAUCUCCCCUCCUUUC      | -24.19764088 |
| plate 34 | D05 | hsa-miR-6892-3p | MIMAT0027685 | UCCCUCCCCACCCCUUGCAG     | -25.39831388 |
| plate 34 | D06 | hsa-miR-7109-3p | MIMAT0028116 | CAAGCCUCUCCUGCCUUCAG     | -73.20608186 |
| plate 34 | D07 | hsa-miR-7843-5p | MIMAT0030411 | GAGGGCAGAGCCAGCUCCUGA    | -2.844312735 |
| plate 34 | D08 | hsa-miR-8059    | MIMAT0030986 | GGGGAACUGUAGAUGAAAAGGC   | 7.940761618  |
| plate 34 | D09 | hsa-miR-8060    | MIMAT0030987 | CCAUGAAGCAGUGGGUAGGAGGAC | -4.753732513 |
| plate 34 | D10 | hsa-miR-8069    | MIMAT0030996 | GGAUGGUUGGGGCGGUCGGCGU   | 2.862963966  |
| plate 34 | D11 | hsa-miR-103b    | MIMAT0007402 | UCAUAGCCUGUACAAUGCUGCU   | -3.709263574 |
| plate 34 | D12 |                 |              |                          |              |
| plate 34 | E01 |                 |              |                          |              |
| plate 34 | E02 | hsa-miR-367-5p  | MIMAT0004686 | ACUGUUGCUGAAUAUGCAACUCU  | 29.83963827  |
| plate 34 | E03 | hsa-miR-499b-3p | MIMAT0019898 | AACAUCACUGCAAGUCUUAACA   | 26.86243551  |
| plate 34 | E04 | hsa-miR-554     | MIMAT0003217 | GCUAGUCCUGACUCAGCCAGU    | -47.58395321 |
| plate 34 | E05 | hsa-miR-1203    | MIMAT0005866 | CCCGGAGCCAGGAUGCAGCUC    | -32.03582073 |
| plate 34 | E06 | hsa-miR-1265    | MIMAT0005918 | CAGGAUGUGGUCAAGUGUUGUU   | 11.6523566   |
| plate 34 | E07 | hsa-miR-3184-5p | MIMAT0015064 | UGAGGGGCCUCAGACCGAGCUUUU | -5.67696845  |
| plate 34 | E08 | hsa-miR-6837-3p | MIMAT0027577 | CCUUCACUGUGACUCUGCUGCAG  | 2.648474809  |
| plate 34 | E09 | hsa-miR-372-5p  | MIMAT0026484 | CCUCAAUGUGGAGCACUAUUCU   | -6.532593674 |
| plate 34 | E10 | hsa-miR-548ba   | MIMAT0031175 | AAAGGUAACUGUGAUUUUUGCU   | 11.33994848  |
| plate 34 | E11 | hsa-miR-3646    | MIMAT0018065 | AAAUGAAAUGAGCCAGCCCA     | -80.2632414  |
| plate 34 | E12 |                 |              |                          |              |
| plate 34 | F01 |                 |              |                          |              |
| plate 34 | F02 | hsa-miR-3923    | MIMAT0018198 | AACUAGUAAUGUUGGAUUAGGG   | 20.9663151   |
| plate 34 | F03 | hsa-miR-3938    | MIMAT0018353 | AAUCCCUUGUAGUAACCCGG     | 37.22319436  |

|          |     |                 |              |                         |              |
|----------|-----|-----------------|--------------|-------------------------|--------------|
| plate 34 | F04 | hsa-miR-4283    | MIMAT0016914 | UGGGGCUCAGCGAGUUU       | -31.43198712 |
| plate 34 | F05 | hsa-miR-4427    | MIMAT0018942 | UCUGAAUAGAGUCUGAAGAGU   | -63.84782668 |
| plate 34 | F06 | hsa-miR-4462    | MIMAT0018986 | UGACACGGAGGGUGGCUUGGGAA | 3.737240421  |
| plate 34 | F07 | hsa-miR-4661-3p | MIMAT0019730 | CAGGAUCCACAGAGCUAGUCCA  | -51.69421825 |
| plate 34 | F08 | hsa-miR-4672    | MIMAT0019754 | UUACACAGCUGGACAGAGGCA   | -10.03669371 |
| plate 34 | F09 | hsa-miR-6734-3p | MIMAT0027370 | CCCUUCCUCACUCUUCUCUCAG  | -80.26557281 |
| plate 34 | F10 | hsa-miR-6754-3p | MIMAT0027409 | UCUUCACCUGCCUCUGCCUGCA  | -75.34397921 |
| plate 34 | F11 | hsa-miR-6786-5p | MIMAT0027472 | GCGGUGGGGCCGGAGGGGCGU   | 3.270959645  |
| plate 34 | F12 |                 |              |                         |              |
| plate 34 | G01 |                 |              |                         |              |
| plate 34 | G02 | hsa-miR-6814-3p | MIMAT0027529 | ACUCGCAUCCUUCUUUGGCAG   | -18.27587502 |
| plate 34 | G03 | hsa-miR-6818-3p | MIMAT0027537 | UUGUCUCUUGUUCUCACACAG   | 26.7365397   |
| plate 34 | G04 | hsa-miR-6846-5p | MIMAT0027592 | UGGGGGCUGGAUGGGGUAGAGU  | 1.862791701  |
| plate 34 | G05 | hsa-miR-6871-5p | MIMAT0027642 | CAUGGGAGUUCGGGGUGGUUGC  | 2.438648459  |
| plate 34 | G06 | hsa-miR-6883-3p | MIMAT0027667 | UUCCUAUCUCACUCUCCUCAG   | -71.79791391 |
| plate 34 | G07 | hsa-miR-6884-3p | MIMAT0027669 | CCCAUCACUUUCCGUCUCCCU   | 10.40272412  |
| plate 34 | G08 | hsa-miR-6892-5p | MIMAT0027684 | GUAAGGGACCGGAGAGUAGGA   | -8.815038073 |
| plate 34 | G09 | hsa-miR-7848-3p | MIMAT0030423 | CUACCCUCGGUCUGCUUACCACA | 8.565577858  |
| plate 34 | G10 | hsa-miR-8055    | MIMAT0030982 | CUUUGAGCAUGAGCAGACGGA   | -14.02339434 |
| plate 34 | G11 | hsa-miR-215-3p  | MIMAT0026476 | UCUGUCAUUUCUUUAGGCCAAUA | -9.237022176 |
| plate 34 | G12 |                 |              |                         |              |
| plate 34 | H01 |                 |              |                         |              |
| plate 34 | H02 |                 |              |                         |              |
| plate 34 | H03 |                 |              |                         |              |
| plate 34 | H04 |                 |              |                         |              |
| plate 34 | H05 |                 |              |                         |              |
| plate 34 | H06 |                 |              |                         |              |
| plate 34 | H07 |                 |              |                         |              |
| plate 34 | H08 |                 |              |                         |              |
| plate 34 | H09 |                 |              |                         |              |
| plate 34 | H10 |                 |              |                         |              |
| plate 34 | H11 |                 |              |                         |              |
| plate 34 | H12 |                 |              |                         |              |
